# Supplementary material for: Scalable convergent synthesis of therapeutic oligonucleotides
Source: Research Square preprint supplement (doi:10.21203/rs.3.rs-594481/v1), 2021-08-06
Supplement: Supplementary file 1 [file 9c240c438c70ebdd32ae68cd.pdf]

# Supplementary Materials Part I for

## Scalable convergent synthesis of therapeutic oligonucleotides

Xuan Zhou, Wuming Yan, William F. Kiesman, Yannick A. Fillon, Hong Jiang, Firoz D. Antia,  
Li Xiao, Jing Yang, Armin Delavari, Robert S. Gronke, Xianglin Shi\*

Correspondence to: [xianglin.shi@biogen.com](mailto:xianglin.shi@biogen.com)

### Table of Contents

|                                                                        |    |
|------------------------------------------------------------------------|----|
| <b>1. Synthesis of fragment I</b> .....                                | 4  |
| <b>2. Synthesis of fragment II</b> .....                               | 9  |
| <b>3. Synthesis of fragment III</b> .....                              | 13 |
| <b>4. Synthesis of fragment V</b> .....                                | 17 |
| <b>5. Synthesis of fragment VI</b> .....                               | 19 |
| <b>6. Synthesis of compounds IV, VII, VIII, and X</b> .....            | 24 |
| <b>7. Purification of DMTr-on (X) and DMTr-off 18-mer (ON-A)</b> ..... | 35 |
| <b>8. Analytical data and spectrums</b> .....                          | 38 |

### List of Schemes

|                                                        |    |
|--------------------------------------------------------|----|
| <b>Scheme 1.</b> Synthesis route of fragment I .....   | 4  |
| <b>Scheme 2.</b> Synthesis route of Fragment II .....  | 9  |
| <b>Scheme 3.</b> Synthesis route of fragment III ..... | 13 |
| <b>Scheme 4.</b> Synthesis route of fragment VI .....  | 19 |
| <b>Scheme 5.</b> Convergent assembly of ON-A .....     | 24 |

## Abbreviations

|                    |                                                                |
|--------------------|----------------------------------------------------------------|
| Ac                 | acetyl                                                         |
| ACN                | acetonitrile anhydrous                                         |
| AEX                | Anion-exchange chromatography                                  |
| ASOs               | antisense oligonucleotides                                     |
| Bz                 | benzoyl                                                        |
| CE                 | 2-cyanoethyl                                                   |
| DCA                | dichloroacetic acid                                            |
| DCC                | <i>N,N'</i> -dicyclohexylcarbodiimide                          |
| DCI                | 4,5-dicyanoimidazole                                           |
| DCM                | dichloromethane                                                |
| DDTT               | 3-[(Dimethylaminomethylene)amino]-3H-1,2,4-dithiazole-5-thione |
| DIPE               | Diisopropyl ether                                              |
| DMF                | <i>N,N</i> -dimethylformamide                                  |
| DMSO               | dimethylsulfoxide                                              |
| DMTr               | 4,4'-dimethoxytrityl                                           |
| DMTrCl             | 4,4'-dimethoxytrityl chloride                                  |
| EA/EtOAc           | ethyl acetate                                                  |
| EDTA               | Ethylenediamine tetra acetic acid                              |
| Eq.                | equivalents                                                    |
| ETT                | 5-ethylthio-1 <i>H</i> -tetrazole                              |
| h                  | hours                                                          |
| HIC                | Hydrophobic Interaction Chromatography                         |
| HF                 | hydrogen fluoride                                              |
| HPLC               | high-performance liquid chromatography                         |
| HRMS               | high resolution mass spectrometry                              |
| Im                 | imidazole                                                      |
| <i>i</i> -Pr       | isopropyl                                                      |
| IPA                | 2-Propanol                                                     |
| Kg                 | kilogram                                                       |
| LPOS               | Liquid phase oligonucleotide synthesis                         |
| MOE                | Methoxyethyl                                                   |
| Me                 | methyl                                                         |
| MeOH               | methanol                                                       |
| min                | Minutes                                                        |
| MS                 | mass spectrometry                                              |
| 3 Å MS             | 3 Å molecular sieves                                           |
| MTBE               | Methyl tert-butyl ether                                        |
| NH <sub>4</sub> OH | Ammonium hydroxide                                             |
| NMI                | <i>N</i> -methylimidazole                                      |
| NMI•TFA            | <i>N</i> -methylimidazole trifluoroacetate                     |
| NMR                | nuclear magnetic resonance                                     |
| Py                 | pyridine                                                       |
| Py•TFA             | pyridine trifluoroacetic acid                                  |
| <i>t</i> -Bu       | <i>tert</i> -butyl                                             |
| TBDPS              | <i>tert</i> -butyldiphenylsilyl                                |
| TBDPSCI            | <i>tert</i> -butyl(chloro)diphenylsilane                       |
| TBAH               | Tributyl Ammonium Acetate                                      |
| TCA                | trichloroacetic acid                                           |
| TEA                | triethylamine                                                  |

|     |                           |
|-----|---------------------------|
| TFA | trifluoroacetic acid      |
| THF | tetrahydrofuran           |
| TLC | thin layer chromatography |
| XH  | Xanthane hydride          |

# 1. Synthesis of fragment I and its amidite Ia

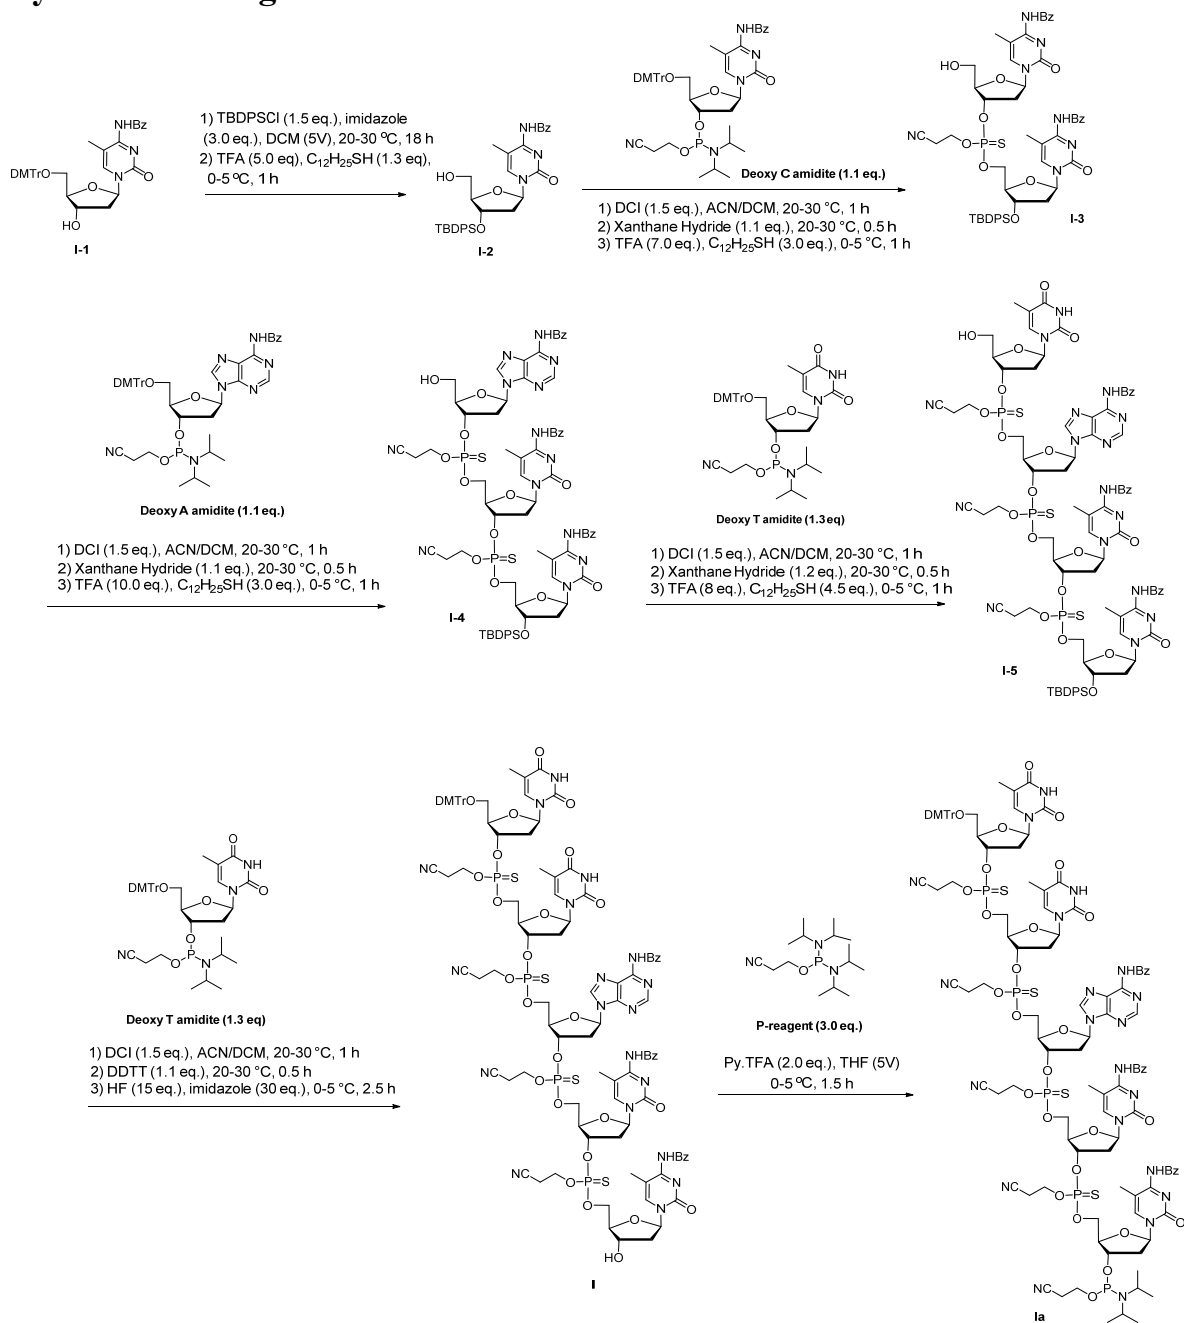

**Scheme 1.** Synthesis route of fragment I

## 5'-OH-Deoxy C-3'-TBDPS, I-2

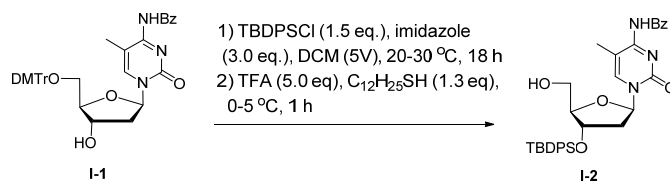

A mixture of **I-1** (150.2 g, 232.0 mmol, 1.00 eq), DCM (750 mL), imidazole (47.4 g, 696 mmol, 3.0 eq), TBDPSCl (95.0 g, 342.7 mmol, 1.49 eq) was stirred at 25 °C for 18 h (HPLC indicated compound **I-1** was consumed > 99.9%). After addition of IPA (14.0 g, 17.9 mL, 1.00 eq) the mixture was stirred at 25 °C for 0.5 h. The mixture was cooled to 0 °C and 1-dodecanethiol (60.8 g, 301.6 mmol, 1.30 eq) was added. TFA (132 g, 1160 mmol, 5.00 eq) was then added dropwise in 0.5 h and the mixture was stirred at 0 °C for 1 h (HPLC indicated the reaction conversion > 99.9%). The reaction mixture was added into Na<sub>2</sub>CO<sub>3</sub> solution (74.2 g Na<sub>2</sub>CO<sub>3</sub> dissolved in 750 mL DI water) in 30 min with vigorous stirring. The organic layer was separated, washed with brine (2 x 450 mL), dried over MgSO<sub>4</sub> (100 g), filtered, and concentrated in vacuo. The crude product was dissolved in DCM (375 mL) and added to a mixture of heptane/TBME (4.3 L, 18:1, v/v) with stirring. The precipitated product was filtered and washed with heptane (2 x 150 mL), dried under vacuum at 20-30 °C for 40 h to afford **I-2** as a white solid (128.2 g, 94.7% yield). HRMS calcd for C<sub>33</sub>H<sub>38</sub>N<sub>3</sub>O<sub>5</sub>Si<sup>+</sup> [M+H]<sup>+</sup>: 584.2581, found: 584.2656.

### 5'-OH-Deoxy CC-3'-TBDPS, **I-3**

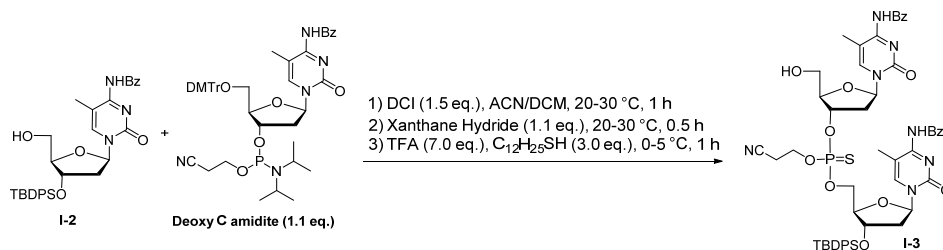

A mixture of **I-2** (100 g, 171.4 mmol, 1.00 eq), ACN/DCM (1000 mL, 1:1, v/v), deoxy C amidite (159.8 g, 188.5 mmol, 1.10 eq) and 3 Å MS (100.0 g) was stirred at 20-30 °C for 1 h. DCI (30.3 g, 257.1 mmol, 1.50 eq) was added and the reaction mixture was stirred at 20-30 °C for 1.0 h (HPLC indicated the conversion of **I-2** was > 99.9%). To the mixture was added xanthane hydride (28.3 g, 188.5 mmol, 1.10 eq) and the mixture was stirred at 20~30 °C for 0.5 h. The reaction mixture was cooled to 0 ± 5 °C and dodecane-1-thiol (105.7 g, 522.8 mmol, 3.05 eq) and TFA (137.8 g, 1.21 mol, 7.05 eq) were added slowly. The mixture was stirred at 0 ± 5 °C for 2 h (HPLC indicated the reaction conversion > 99.9%) and NMI (99.3 g, 1.21 mol, 7.0 eq) and EtOAc (3.0 L) were added and the mixture was stirred vigorously for 30 min at 20-30 °C.

The reaction mixture was filtered to remove 3 Å MS, washed with brine (5%wt, 1.0 L), aqueous NaHCO<sub>3</sub> solution (5%wt, 1.0 L), brine (2 x 1.0 L) and diluted with DCM (3.0 L). The solution was filtered through the silica gel pad (1500 g) and the pad was washed with a mixture of DCM/EtOAc (3.0 L, 1:1, v/v). The filtrate was concentrated, and the residue was dissolved in ACN (1000 mL) and then brine (5% wt, 0.5 L) was added. The mixture was extracted with heptane/TBME (2 x 2.5 L, 4:1, v/v). The bottom layers were collected and extracted with TBME

(720 mL) after addition of brine (1000 mL). The organic layer was separated and washed with brine (2 x 1.0 L) and then concentrated. The residue was dissolved in DCM azeotropically distilled and the **I-3** solution in DCM (600 mL) was used for the next step without further purification. HRMS calcd for  $C_{53}H_{59}N_7O_{11}PSSi^+$   $[M+H]^+$ : 1060.3500, found: 1060.3591.

### 5'-OH-Deoxy ACC-3'-TBDPS, I-4

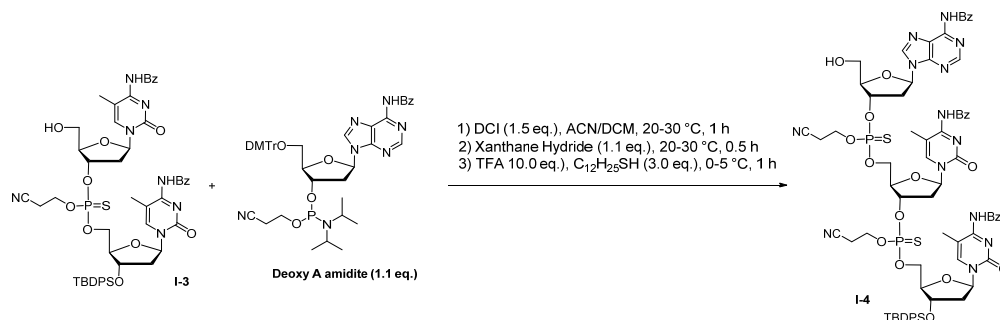

The DCM solution of **I-3** (181.6 g, 171.4 mmol, 1.00 eq) from the previous step was added to a mixture of deoxy A amidite (161.6 g, 188.5 mmol, 1.10 eq), 3 Å MS (120.0 g), and ACN (600 mL) and the mixture was stirred at 20-30 °C for 1 h. DCI (30.3 g, 257.1 mmol, 1.50 eq) was added and the mixture was stirred for 1.0 h at 20-30 °C (HPLC indicated the reaction conversion > 99.9%). Xanthane hydride (28.3 g, 188.5 mmol, 1.10 eq) was added, and the mixture was stirred at 20-30 °C for 0.5 h. The reaction mixture was cooled to  $0 \pm 5$  °C and dodecane-1-thiol (105.0 g, 519.4 mmol, 3.03 eq) and TFA (194.7 g, 1.71 mol, 9.97 eq) were added slowly, and stirred at  $0 \pm 5$  °C for 2 h (HPLC indicated the reaction conversion > 99.9%). NMI (155.1 g, 1.89 mol, 11.0 eq) and EtOAc/MTBE (3.0 L, 2:1, v/v) were added and the mixture was stirred vigorously for 30 min at 20-30 °C. The reaction mixture was filtered to remove 3 Å MS, washed with brine (5%wt, 2.0 L), aqueous  $NaHCO_3$  solution (5%wt, 2 x 2.0 L), and brine (2 x 2.0 L), dried over  $MgSO_4$  (100 gram), filtered, and concentrated in vacuo. The crude product was dissolved in DCM (1300 mL) and slowly added into MTBE (9.0 L). The precipitated product was filtered and washed with TBME (2 x 400 mL) and dried under vacuum at 20-30 °C for 40 h to yield **I-4** as a yellowish solid (219.6 g, 82.9% yield). HRMS calcd for  $C_{73}H_{78}N_{13}O_{16}P_2S_2Si^+$   $[M+H]^+$ : 1546.4375, found: 1546.4368.

### 5'-OH-Deoxy-TACC-3'-TBDPS, I-5

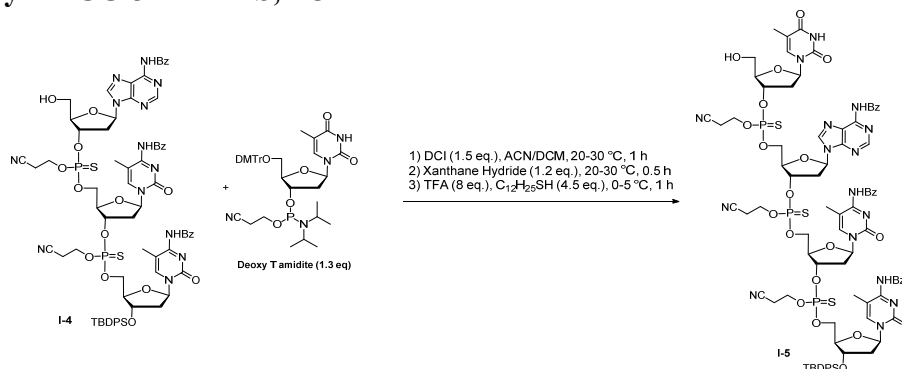

A mixture of **I-4** (212.0 g, 137.2 mmol, 1.00 eq), ACN/DCM (1280 mL, 1:1, v/v), deoxy T amidite (132.7 g, 178.3 mmol, 1.30 eq), 3 Å MS (128.0 g) was stirred at 20-30 °C for 1 h and then DCI (24.2 g, 205.8 mmol, 1.50 eq) was added. The reaction mixture was stirred for 1.0 h at 20-30 °C (HPLC indicated the reaction conversion > 99.9%). IPA (0.103 eq.) was added and stirred for 0.5 h at 20-30 °C to quench the excess amidite. Xanthane hydride (24.7 g, 164.6 mmol, 1.20 eq) was added and the mixture was stirred at 20-30 °C for 0.5 h. The reaction mixture was cooled to 0 ± 5 °C and dodecane-1-thiol (124.8 g, 617.4 mmol, 4.5 eq) and TFA (125.0 g, 1.10 mol, 8.0 eq) were added slowly and the reaction mixture was stirred at 0 ± 5 °C for 1 hour (HPLC indicated the reaction conversion > 99.9%). NMI (101.3 g, 1.23 mol, 9.0 eq) and EtOAc (6.4 L) were added and the mixture was stirred vigorously for 30 min at 20-30 °C. The reaction mixture was filtered to remove 3 Å MS, washed with brine (5%wt, 2.1 L), aqueous NaHCO<sub>3</sub> solution (5%wt, 2 x 4.2 L), brine (2 x 4.2 L), dried over MgSO<sub>4</sub> (100 gram), filtered, and concentrated in vacuo. The concentrated crude product was dissolved in DCM (1500 mL) and slowly added to MTBE (8.5 L) to precipitate the product, which was filtered, washed with TBME (2 x 400 mL), dried under vacuum at 20-30 °C for 40 h to afford **I-5** as a light-yellow solid (242.0 g, 92.0% yield). HRMS calcd for C<sub>86</sub>H<sub>94</sub>N<sub>16</sub>O<sub>22</sub>P<sub>3</sub>S<sub>3</sub>Si<sup>+</sup> [M+H]<sup>+</sup>: 1919.4873, found: 1919.4801.

### 5'-DMTr-Deoxy TTACC-3'-OH, **I**

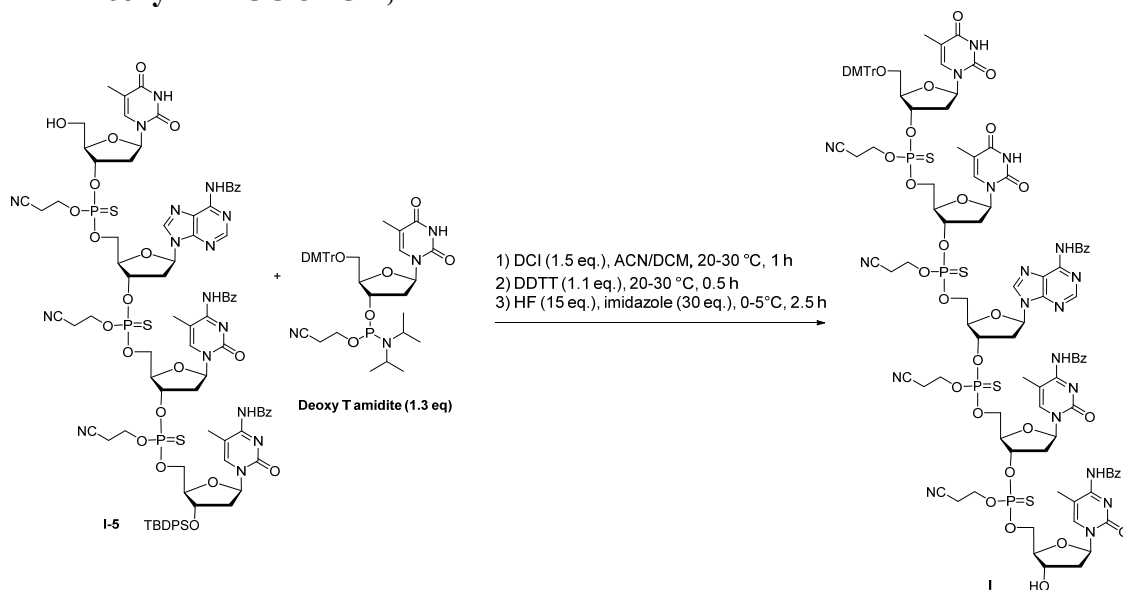

A mixture of **I-5** (235.0 g, 122.5 mmol, 1.00 eq), ACN/DCM (1600 mL, 3:1, v/v), deoxy T amidite (149.0 g, 159.3 mmol, 1.30 eq), and 3 Å MS (165.0 g) was stirred at 20-30 °C for 1 h and DCI (21.8 g, 183.8 mmol, 1.50 eq) was added, and the mixture was stirred for 0.5 h (HPLC indicated the reaction conversion > 99.8%). DDTT (27.8 g, 134.8 mmol, 1.10 eq) was added and the reaction mixture was stirred at 20-30 °C for 0.5 h.

To a separated reactor containing a solution of imidazole (188.4 g, 3.68 mol, 30.00 eq) in anhydrous THF (705 mL) at 0 ± 5 °C was added HF•Py (36.9 g, 15.0 eq, ~70% HF in pyridine) slowly and the mixture was stirred at 0 ± 5 °C for 30 min. The freshly prepared HF-imidazole solution was slowly added into the reaction mixture from above step and the resulting mixture was

stirred at  $0 \pm 5\text{ }^{\circ}\text{C}$  for 2.5 h (HPLC indicated the reaction conversion  $> 99.8\%$ ). EtOAc (5.4 L) was added and the reaction mixture was filtered to remove the 3 Å MS, washed with aqueous  $\text{NaHCO}_3$  solution (2.5%wt, 2 x 3.5 L), brine (2 x 2.8 L), dried over  $\text{MgSO}_4$  (100 gram), filtered, and concentrated in vacuo. The concentrated crude product was dissolved in DCM/ACN (2.5 L, 2:1, v/v) and was slowly added to MTBE (11.8 L). The precipitated product was filtered, washed with TBME (2 x 940 mL), and dried under vacuum at 20-30  $^{\circ}\text{C}$  for 40 h to yield **I** as a light-yellow solid (287.3 g, 99.6% yield). HRMS calcd for  $\text{C}_{104}\text{H}_{110}\text{N}_{19}\text{O}_{30}\text{P}_4\text{S}_4^+$   $[\text{M}+\text{H}]^+$ : 2357.5533, found: 2357.5610.

### 5'-DMTr-Deoxy-TTACC-3'-Phosphoramidite, **Ia**

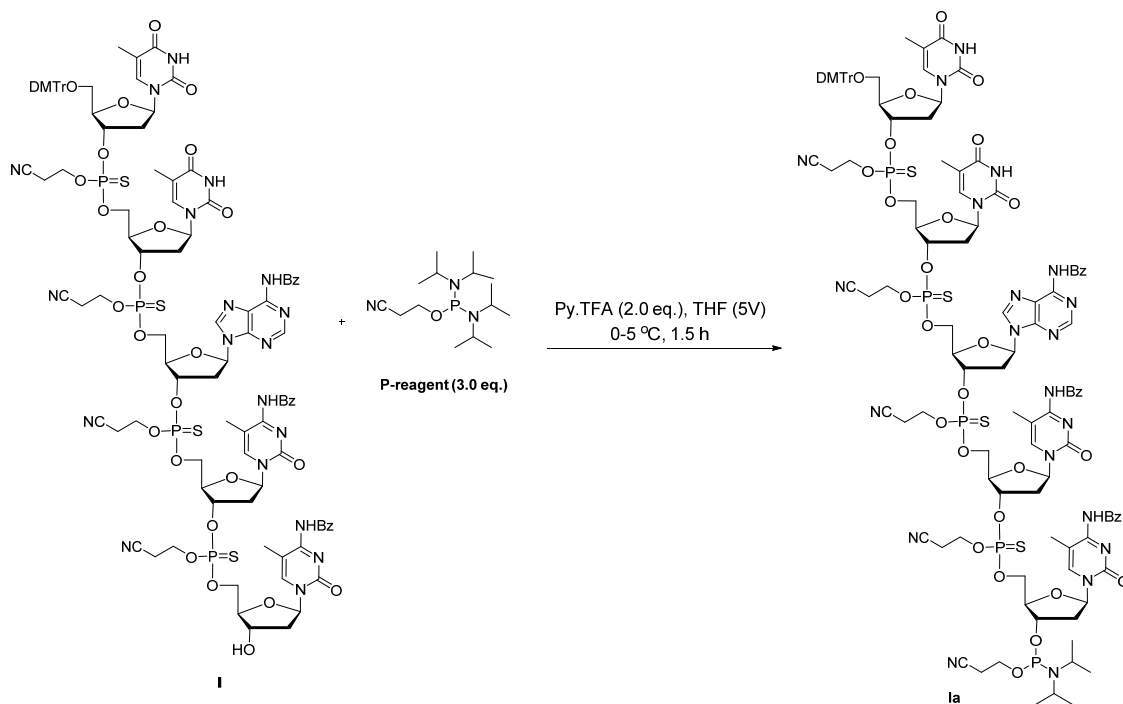

A solution of **I** (270 gram, 114.6 mmol) in DCM (1000 mL) was azeotropically distilled on a rotary evaporator with continuous addition of DCM ( $\sim 2$  L) until the water content of the solution was  $< 0.05\%$  by Karl Fischer analysis). After removal of most of the DCM on the rotary evaporator, THF (1350 mL) was added and the mixture was cooled to  $0 \pm 5\text{ }^{\circ}\text{C}$ . 2-Cyanoethyl tetraisopropylphosphorodiamidite (104 gram, 344 mmol) and TFA•Py (44.3 gram, 229.2 mmol) were added and the reaction mixture was stirred at  $0 \pm 5\text{ }^{\circ}\text{C}$  for 1 h until the conversion of compound **I** was  $> 99\%$  (monitored by HPLC).

The reaction mixture was added into TBME/heptane (13.5 L, 6:1, v/v)  $0 \pm 5\text{ }^{\circ}\text{C}$  in 30 min with vigorous stirring and agitation was continued at the same temperature for 30 min. The precipitated product was filtered, washed with heptane/TBME (2 x 675 mL, 6:1, v/v), dried under vacuum at 20-30  $^{\circ}\text{C}$  for 24 h to yield **Ia** as a white solid (283.0 gram, yield 96.6%).



## 2. Synthesis of fragment II

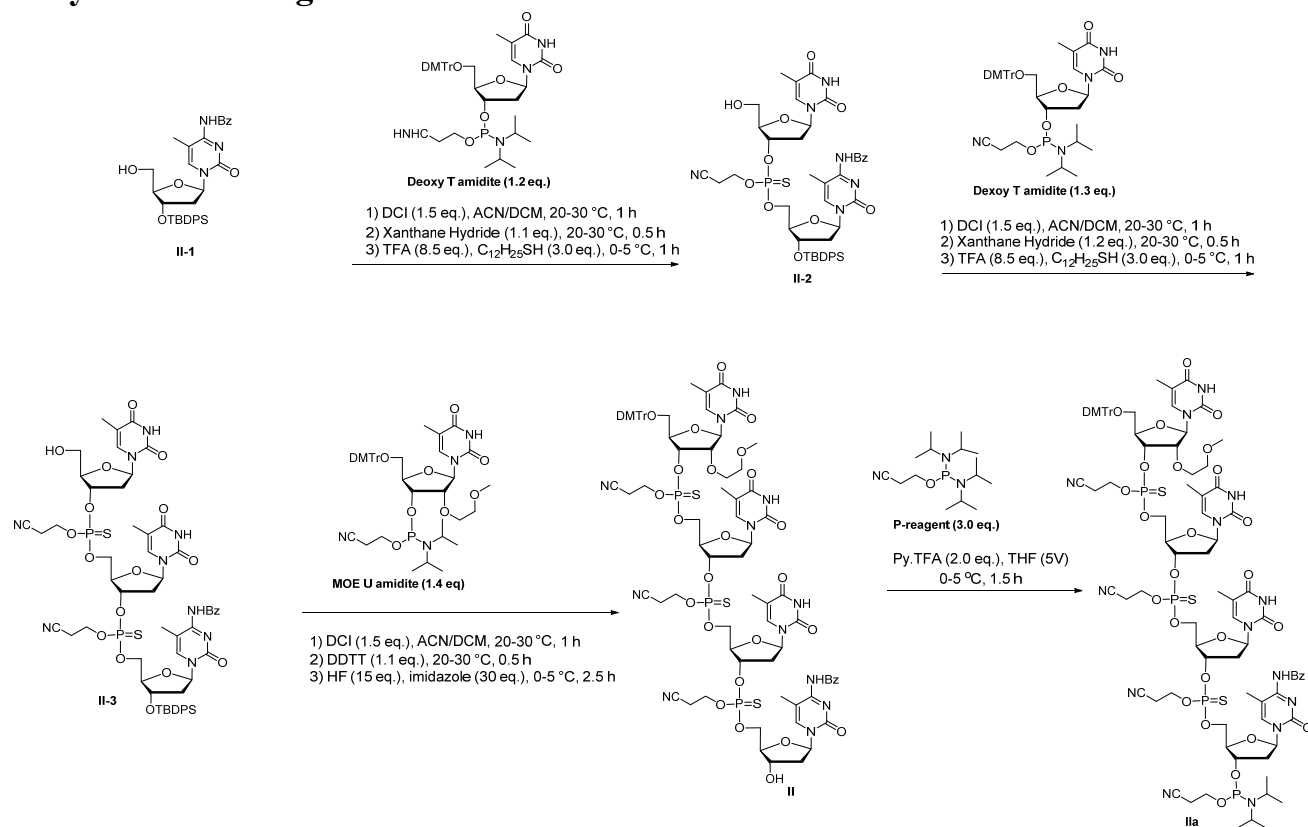

**Scheme 2.** Synthesis route of Fragment II

### 5'-OH-Deoxy-TC-3'-TBDPS, II-2

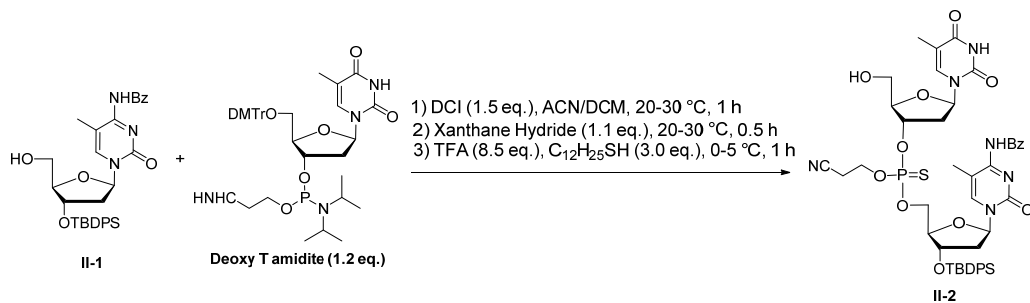

A mixture of **II-1** (171.5 g, 294.0 mmol, 1.00 eq), ACN/DCM (1700 mL, 1:1, v/v), deoxy T amidite (261.5 g, 352.8 mmol, 1.20 eq) and 3 Å MS (170.0 g) was stirred at 20-30 °C for 1 h and DCI (52.0 g, 441 mmol, 1.50 eq) was added. The reaction mixture was stirred for 1.0 h at 20-30 °C (HPLC indicated the reaction conversion > 99.9%). IPA (1.8 g, 30.3 mmol, 0.103 eq.) was added, and the reaction mixture was stirred for 0.5 h at 20~30 °C to quench the excess amidites. Xanthane hydride (49.0 g, 326.3 mmol, 1.11 eq) was added and the mixture was stirred at 20~30 °C for 0.5 h. The reaction mixture was cooled to 0 ± 5 °C and dodecane-1-thiol (182.2.8 g, 899.6 mmol, 3.06 eq) and TFA (283.5 g, 2.49 mol, 8.46 eq) were added slowly and the reaction mixture was stirred

at  $0 \pm 5$  °C for 1 h (HPLC indicated the reaction conversion > 99.9%). The reaction mixture was filtered to remove 3 Å MS and added into Na<sub>2</sub>CO<sub>3</sub> solution (163.5 g Na<sub>2</sub>CO<sub>3</sub> dissolved in 1.80 L DI water) in 30 min under vigorous stirring. EtOAc/TBME (5.1 L, 1:3, v/v) was added and stirred vigorously for 10 min. The organic layer was separated, washed with NaHCO<sub>3</sub> solution (3.5%wt, 2 x 1.7 L), brine (2 x 1.7 L), dried over MgSO<sub>4</sub> (170 gram), filtered, and concentrated in vacuo. The concentrated crude product was dissolved in EtOAc/DIPE (850 mL, 4:1, v/v) and slowly added to a mixture of DIPE/heptane (6.6 L, 7:32, v/v). The precipitated product was filtered, washed with heptane (2 x 170 mL) and dried under vacuum at 20-30 °C for 40 h to yield **II-2** as a yellowish solid (261.5 g, 93.0% yield). HRMS calcd for C<sub>46</sub>H<sub>54</sub>N<sub>6</sub>O<sub>11</sub>PSSi<sup>+</sup> [M+H]<sup>+</sup>: 957.3078, found: 957.3038.

### 5'-OH-Deoxy-TTC-3'-TBDPS, **II-3**

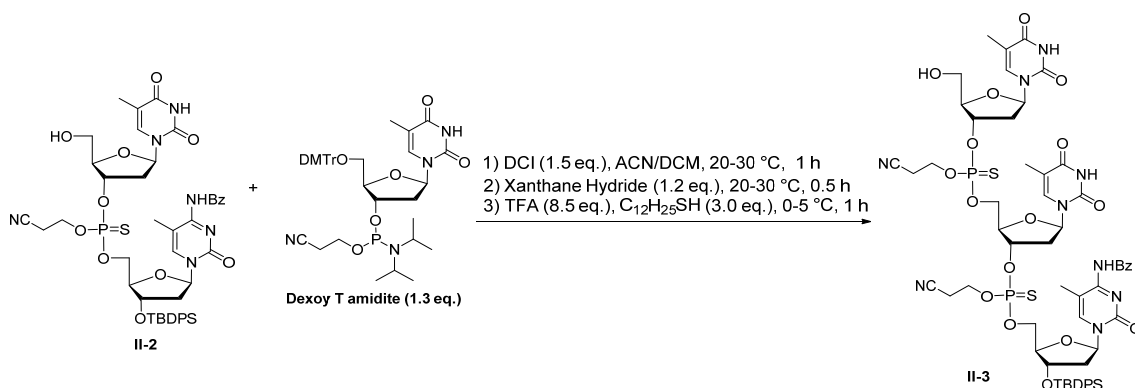

A mixture of **II-2** (253.5 g, 265.1 mmol, 1.00 eq), ACN/DCM (1400 mL, 1:1, v/v), deoxy T amidite (256.5 g, 344.6 mmol, 1.30 eq) and 3 Å MS (210.0 g) was stirred at 20-30 °C for 1 h and DCI (47.0 g, 397.6 mmol, 1.50 eq) was added. The reaction mixture was stirred for 1.0 h at 20-30 °C (HPLC indicated the reaction conversion > 99.9%). IPA (1.6 g, 26.6 mmol, 0.103 eq.) was added and stirred for 0.5 h at 20-30 °C to quench the excess amidite. Xanthane hydride (47.8 g, 318.1 mmol, 1.2 eq) was added and the mixture was stirred at 20~30 °C for 0.5 h. The reaction mixture was cooled to  $0 \pm 5$  °C and dodecane-1-thiol (161.0 g, 795.3 mmol, 3.0 eq) and TFA (257.0 g, 2.25 mol, 8.5 eq) were added slowly, and the reaction mixture was stirred at  $0 \pm 5$  °C for 1 h (HPLC indicated the reaction conversion > 99.9%).

The reaction mixture was filtered to remove 3 Å MS and was added into Na<sub>2</sub>CO<sub>3</sub> solution (147.5 g Na<sub>2</sub>CO<sub>3</sub> in 2.6 L DI water) in 30 min under vigorous stirring. EtOAc/TBME (10 L, 1:2, v/v) was added and stirred vigorously for 10 min. The organic layer was separated, washed with NaHCO<sub>3</sub> solution (3.5% wt, 2 x 2.5 L), brine (2 x 2.5 L), dried over MgSO<sub>4</sub> (250 gram), filtered, and concentrated in vacuo. The concentrated crude product was dissolved in EtOAc (1300 mL) and added to a mixture of TBME/heptane (7.9 L, 1:1, v/v). The precipitated product was filtered, washed with MTBE/heptane (2 x 250 mL, 1:1, v/v) and dried under vacuum at 20-30 °C for 40 h to yield **II-3** as a lightly yellow solid (315.0 g, 89.4% yield). HRMS calcd for C<sub>59</sub>H<sub>69</sub>N<sub>9</sub>O<sub>17</sub>P<sub>2</sub>S<sub>2</sub>Si<sup>+</sup> [M+H]<sup>+</sup>: 1330.3576, found: 1330.3634.

## 5'-DMTr-MOE-U-Deoxy TTC-3'-OH, II

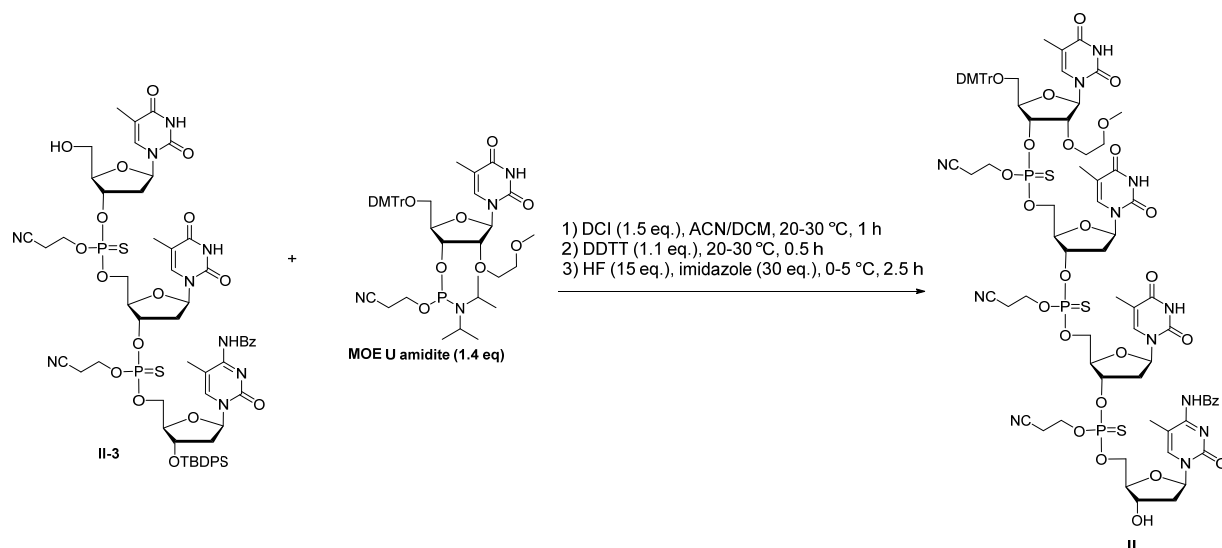

A mixture of **II-3** (301.5 g, 226.8 mmol, 1.00 eq), ACN (1500 mL), MOE U amidite (245.0 g, 299.4 mmol, 1.32 eq) and 3 Å MS (301.0 g) was stirred at 20-30 °C for 1 h and DCI (40.1 g, 340 mmol, 1.50 eq) was added. The mixture was stirred for ~1 h (HPLC indicated the reaction conversion > 99.8%). DDTT (51.5 g, 251.7 mmol, 1.10 eq) was added and the mixture was stirred at 20-30 °C for 0.5 h.

To a separated reactor containing a solution of imidazole (462.9 g, 6.8 mol, 30.00 eq) in anhydrous THF (1200 mL) at  $0 \pm 5$  °C was added HF•Py (97.0 g, 15.0 eq, ~70% HF in pyridine) slowly and the mixture was stirred at  $0 \pm 5$  °C for 30 min. The freshly prepared HF-imidazole solution was slowly added into the reaction mixture from above step and the resulting mixture was stirred at  $0 \pm 5$  °C for 2.5 h (HPLC indicated the reaction conversion > 99.8%).

EtOAc (7.5 L) was added and the 3 Å MS was removed by filtration. The filtrate was washed with 3.5% aqueous NaHCO<sub>3</sub> solution (2 x 3.0 L), water (3.0 L), brine (3.0 L), dried over MgSO<sub>4</sub> (300 gram), filtered, and concentrated in vacuo. The concentrated crude product was dissolved in DCM (2.1 L) and slowly added into EtOH (23.0 L). The precipitated product was filtered, washed with EtOH (2 x 300 mL) and dried under vacuum at 20-30 °C for 40 h to yield **II** as a lightly yellow solid (308.4 g, 74% yield). HRMS calcd for C<sub>80</sub>H<sub>92</sub>N<sub>12</sub>O<sub>27</sub>P<sub>3</sub>S<sub>3</sub><sup>+</sup> [M+H]<sup>+</sup>: 1841.4570, found: 1841.4640.

## 5'-DMTr-MOE-U-Deoxy TTC-3'- Phosphoramidite, **IIa**

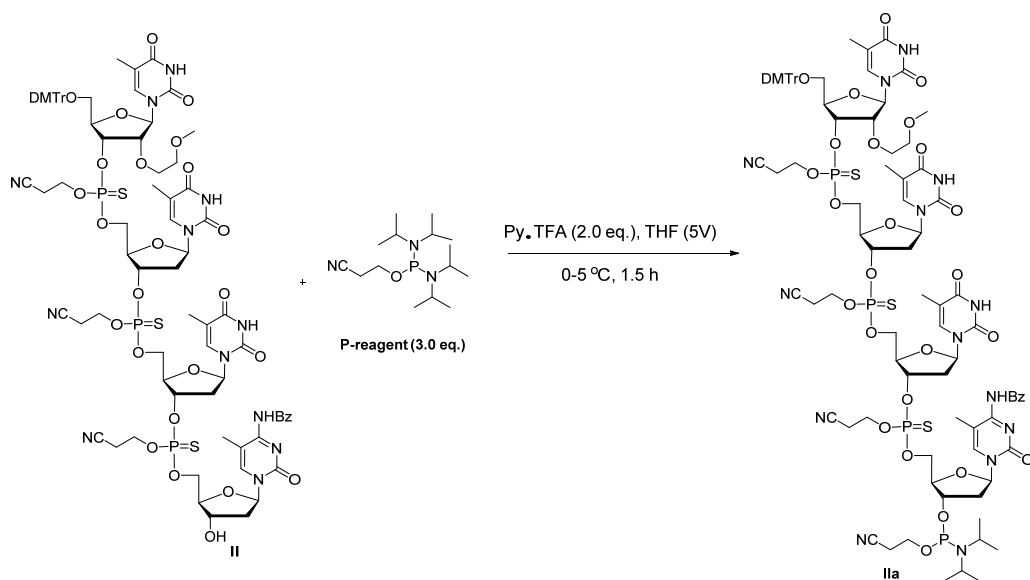

A solution of **II** (210 gram, 114.1 mmol) in DCM (1000 mL) was azeotropically distilled on a rotary evaporator with continuous addition of DCM (2 L) until the water content of the final solution was <0.05% by Karl Fischer analysis. After removal of most of the DCM with the rotary evaporator, the dried **II** was dissolved in THF (1050 mL). The mixture was cooled to  $0 \pm 5$  °C and 2-cyanoethyl tetraisopropylphosphorodiamidite (103.5 gram, 342 mmol) and TFA•Py (44.0 gram, 228.2 mmol) were added. The reaction mixture was stirred at  $0 \pm 5$  °C for 1 h (the starting material conversion was > 99%, monitored by HPLC). The reaction mixture was then added into TBME/heptane (10.5 L, 6:1, v/v) in 30 min with vigorous stirring and the mixture was agitated at  $0 \pm 5$  °C for 30 min. The product was filtered, washed with heptane/TBME (2 x 675 mL, 6:1, v/v) and dried under vacuum at 20-30 °C for 24 h to yield **IIa** as a white solid (230 gram, yield 98.7%).

### 3. Synthesis of fragment III

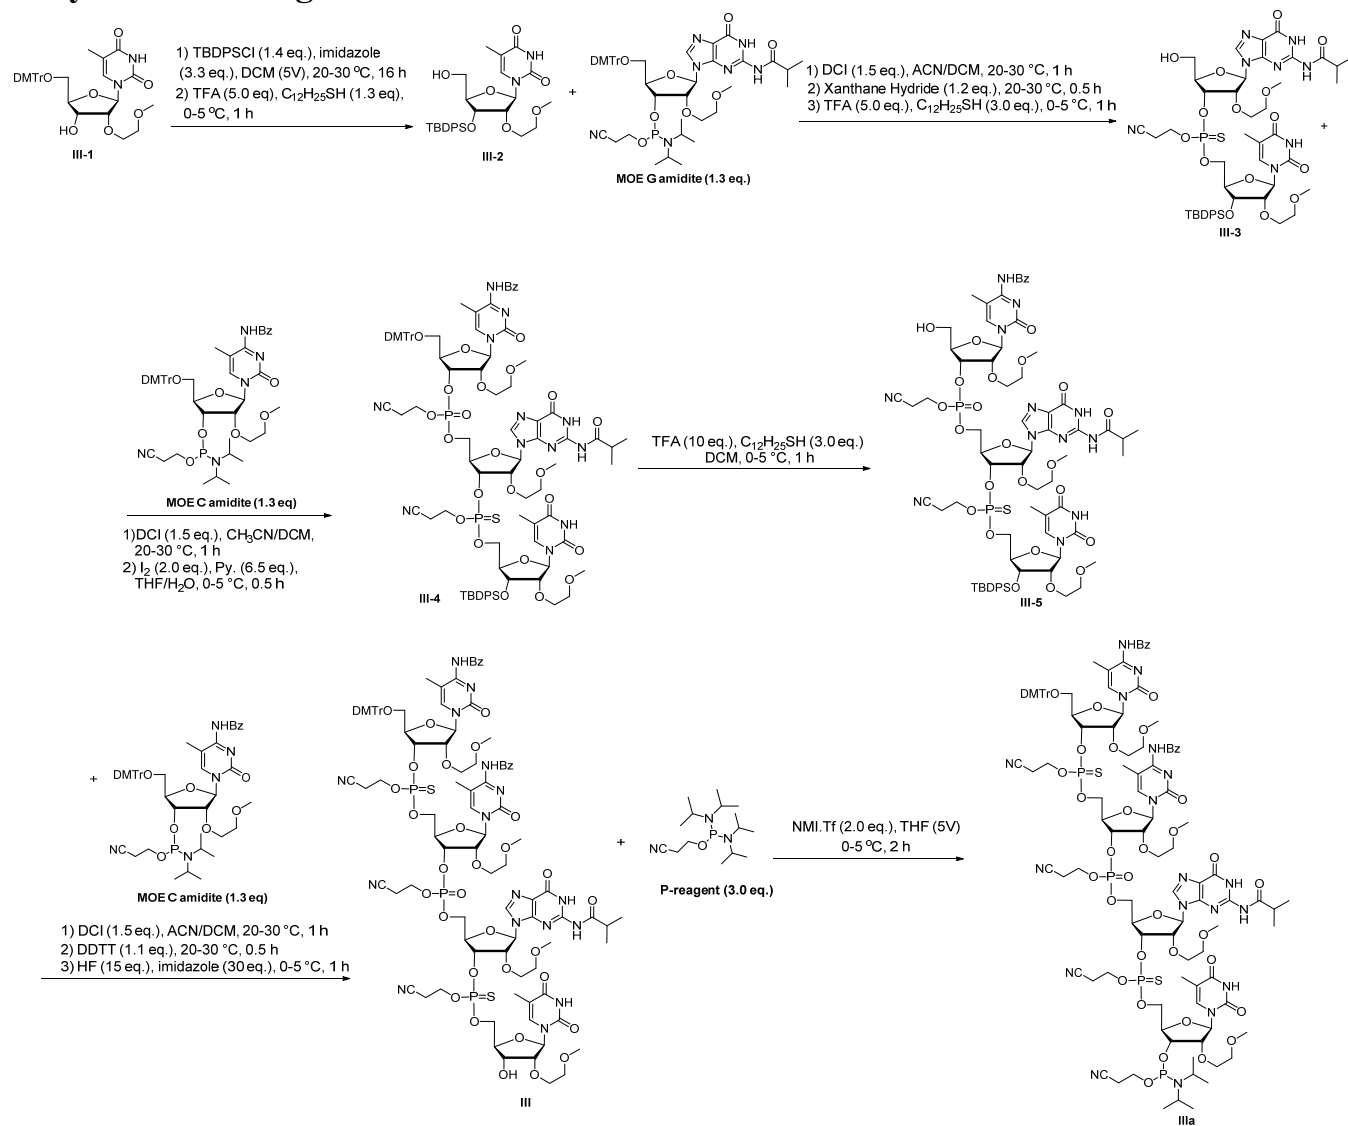

*Scheme 3. Synthesis route of fragment III*

#### 5'-OH-MOE-U-3'-TBDPS, III-2

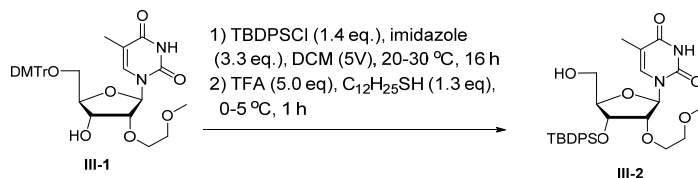

A mixture of **III-1** (150.0 g, 242.0 mmol, 1.00 eq), imidazole (54.6 g, 798 mmol, 3.3 eq) and TBDPSCI (93.3 g, 338.8 mmol, 1.40 eq) in DCM (750 mL) was stirred at 25°C for 16 h (HPLC indicated compound **III-1** was consumed > 99.9%). After IPA (14.6 g, 18.6 mL, 1.00 eq) was

added, the mixture was stirred at 25 °C for 0.5 h and then cooled to 0 °C. 1-Dodecanethiol (63.8 g, 314.6 mmol, 75.3 mL, 1.30 eq) and TFA (138 g, 1210 mmol, 92.5 mL, 5.00 eq) were added dropwise and the mixture was stirred at 0 °C for 1 h (HPLC indicated the reaction conversion > 99.9%). The reaction mixture was added into Na<sub>2</sub>CO<sub>3</sub> solution (77.1 g Na<sub>2</sub>CO<sub>3</sub> in 750 mL DI water) in 30 min with vigorous stirring. The organic layer was separated, washed with brine (2 x 450 mL), dried over MgSO<sub>4</sub> (100 g), filtered, and concentrated in vacuo. The crude product was dissolved in ACN/H<sub>2</sub>O (1350 mL, 2:1, v/v) and extracted with heptane/TBME (2 x 1350 mL, 4:1, v/v). The organic layer was washed with brine (2 x 450 mL), dried over MgSO<sub>4</sub> (100 g), filtered, and concentrated in vacuo. The product was dried under vacuum at 20-30 °C for 40 h to yield **III-2** as a white foam solid (130.5 g, 97% yield). HRMS calcd for C<sub>29</sub>H<sub>38</sub>N<sub>2</sub>O<sub>7</sub>Si<sup>+</sup> [M+H]<sup>+</sup>: 555.2527, found: 555.2596.

### 5'-OH-MOE-GU-3'-TBDPS, **III-3**

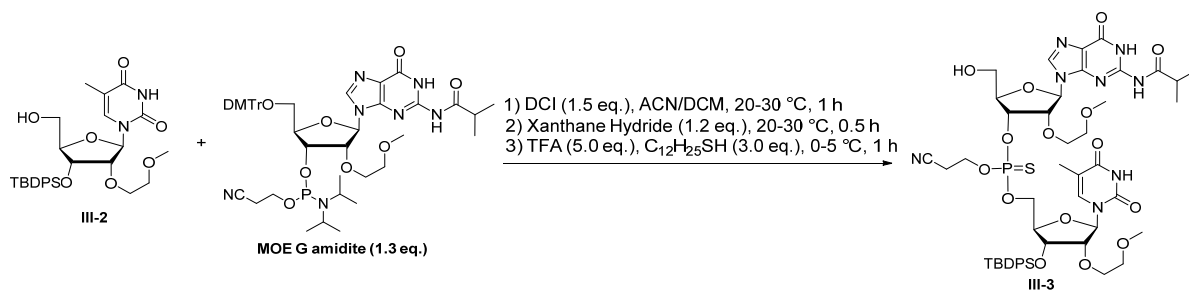

A mixture of **III-2** (120.0 g, 216.5 mmol, 1.00 eq), MOE G amidite (257 g, 281.5 mmol, 1.30 eq) and 3 Å MS (120.0 g) in ACN (1.2 L) was stirred at 20~30 °C for 1 h and DCI (38.3 g, 324.8 mmol, 1.50 eq) was added. The reaction mixture was stirred for 1.0 h at 20~30 °C (HPLC indicated the reaction conversion > 99.9%). IPA (1.3 gram, 21.6 mmol, 0.103 eq.) was added and the reaction mixture was stirred for 0.5 h at 20~30 °C to quench the excess amidites. Xanthane hydride (39 g, 259.8 mmol, 1.2 eq) was added and the reaction mixture was stirred at 20~30 °C for 0.5 h, cooled to 0 ± 5 °C and dodecane-1-thiol (131.4 g, 649.6 mmol, 3.0 eq). TFA (123.3 g, 1.08 mol, 5.0 eq) were added slowly and the reaction mixture was stirred at 0±5 °C for 1.0 h (HPLC indicated the reaction conversion > 99.9%).

The reaction mixture was filtered to remove 3 Å MS and added into Na<sub>2</sub>CO<sub>3</sub> solution (80.3 g Na<sub>2</sub>CO<sub>3</sub> in 1.2 L DI water) in 30 min with vigorous stirring. EtOAc/TBME (3.6 L, 1:2, v/v) was added and stirred vigorously for 10 min. The organic layer was separated, washed with NaHCO<sub>3</sub> solution (3.5wt %, 2 x 2.4 L), brine (2.4 L), dried over MgSO<sub>4</sub> (120 g), filtered, and concentrated in vacuo. The crude product was dissolved in ACN/water (1.8 L, v/v, 2:1) and extracted with heptane/TBME (2 x 1.2 L, 4:1, v/v). The top layer was discarded and TBME (720 mL) and brine (500 mL) were added to the bottom layers. The organic layer was separated, washed with brine (2 x 500 mL), and concentrated. The crude product was dissolved in EtOAc/MTBE (1.2 L, 7:3, v/v) and PPh<sub>3</sub> (22.7 g, 86.6 mmol, 0.40 eq) was added. The solution was slowly added to a mixture of TBME/heptane (5.2 L, 7:36, v/v). The precipitated product was filtered, washed with heptane (2 x 120 mL), dried under vacuum at 20-30 °C for 40 h to yield **III-3** as a lightly yellow solid (214.4 g, 90.3% yield). HRMS calcd for C<sub>49</sub>H<sub>66</sub>N<sub>8</sub>O<sub>15</sub>PSSi<sup>+</sup> [M+H]<sup>+</sup>: 1097.3875, found: 1097.3854.

### 5'-DMTr-MOE-CoGU-3'-TBDPS, III-4

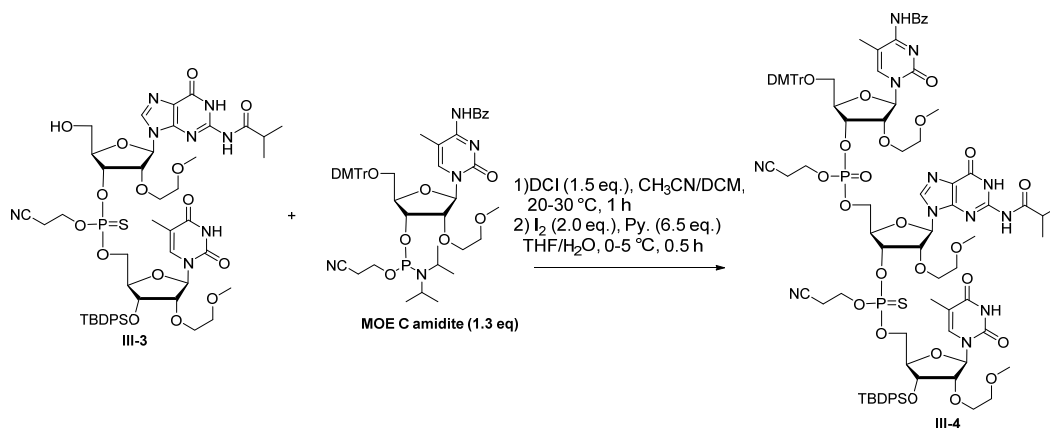

A mixture of **III-3** (200 g, 182.4 mmol, 1.00 eq), MOE C amidite (231.6 g, 237.2 mmol, 1.30 eq) and 3Å MS (200.0 g, 10 % wt/vol of solvent) in ACN (2.0 L) was stirred at 20-30 °C for 1 h, DCI (32.3 g, 273.6 mmol, 1.50 eq) was added, and the reaction mixture was stirred at 20-30 °C for 1.0 h (HPLC indicated the reaction conversion > 99.9%). A solution of iodine (92.5 g, 364.8 mmol, 2.00 eq) and pyridine (86.5 g, 1094.0 mmol, 6.00 eq) in THF/H<sub>2</sub>O (1.2 L, 5:1, v/v) was added to the reaction mixture dropwise at 0-5 °C in 0.5 h and stirred at 0-5 °C for 0.5 h. A 4 wt% aqueous solution of Na<sub>2</sub>S<sub>2</sub>O<sub>3</sub> (90.5 g, 364.8 mmol, 2.00 eq) was added dropwise at 0-5 °C and stirred at 15-25 °C for 10 min. EtOAc/TBME (6.0 L, 1:1, v/v) was added and stirred vigorously for 30 min. The top organic layer was separated, washed with 5 wt% NaHCO<sub>3</sub> solution (2 x 2.0 L), brine (2.0 L), dried over MgSO<sub>4</sub> (200 g), filtered, and concentrated in vacuo to yield the crude product **III-4** (253.6 g), which was used for the next step without further purification.

### 5'-OH-MOE-CoGU-3'-TBDPS, III-5

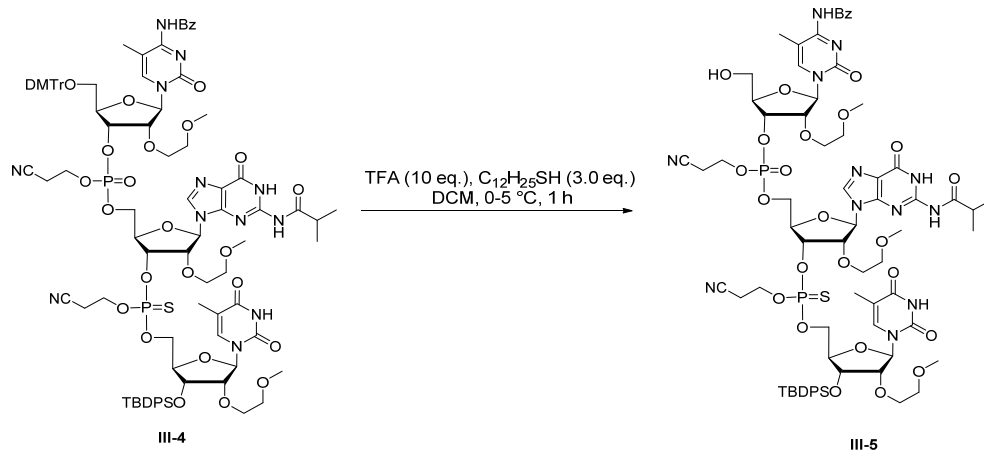

A solution of **III-4** (325.5 g, 168.4 mmol, 1.00 eq) 3Å MS (81 g) in DCM (1.63 L) was stirred at 25 °C for 1.0 h and cooled down to 0-5 °C. 1-Dodecanethiol (102.0 g, 505.2 mmol, 3.0 eq) and TFA (191.8 g, 1684 mmol, 10.00 eq) were added dropwise at 0 °C in 0.5 h, the reaction mixture

was stirred at 0±5 °C for 1.0 h (HPLC indicated the reaction conversion > 99.9%).

The reaction mixture was filtered to remove 3 Å MS and added into Na<sub>2</sub>CO<sub>3</sub> solution (107 g Na<sub>2</sub>CO<sub>3</sub> in 1.7 L DI water) with vigorous stirring. EtOAc (4.8 L) and MTBE (4.8 L) were added and stirred vigorously for 10 min. The organic layer was separated, washed with 5wt% aqueous NaHCO<sub>3</sub> solution (2 x 1.5 L), brine (1.5 L), dried over MgSO<sub>4</sub> (350 g), filtered, and concentrated in vacuo. The crude product was dissolved in EtOAc (650 mL) slowly added to a mixture of heptane/TBME (3.2 L, 1:1, v/v). The precipitated product was filtered, washed with heptane/TBME (2 x 350 mL, 1:1, v/v) and dried under vacuum at 20-30 °C for 40 h to yield **III-5** as a white solid (245.1 g, 89.2% yield). HRMS calcd for C<sub>72</sub>H<sub>93</sub>N<sub>12</sub>O<sub>24</sub>P<sub>2</sub>SSi<sup>+</sup> [M+H]<sup>+</sup>: 1631.5391, found: 1631.5377.

### 5'-DMTr-MOE-CCoGU-3'-OH, **III**

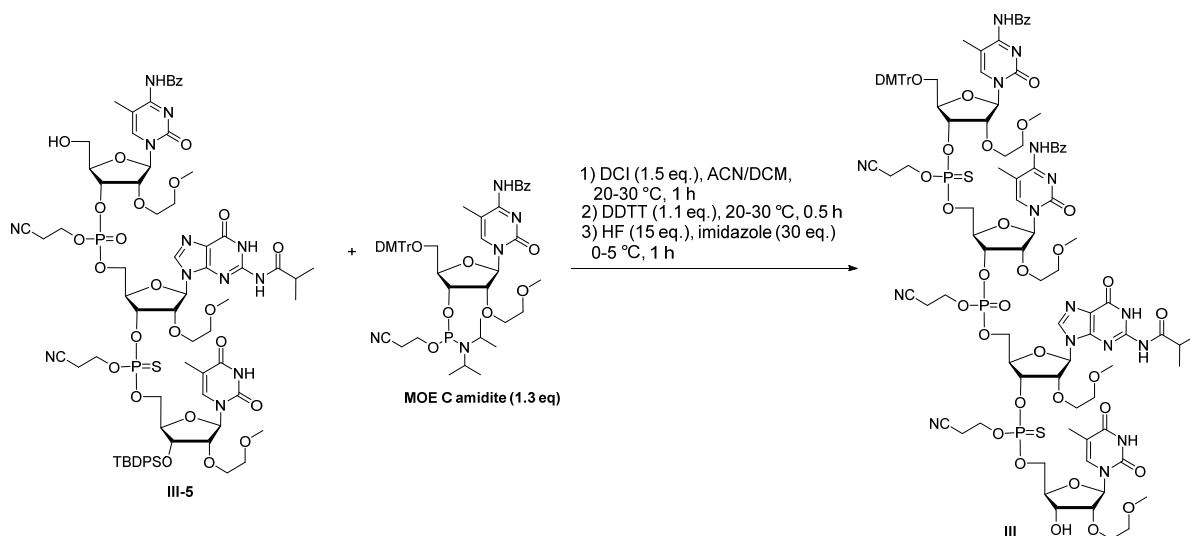

A mixture of **III-5** (250 g, 153.3 mmol, 1.00 eq), MOE C amidite (183.7 g, 199.3 mmol, 1.30 eq) and 3Å MS (250.0 g, 10 % wt/vol of solvent) in ACN (2.5 L) was stirred at 20-30 °C for 1.0 h, DCI (27.5 g, 231.5 mmol, 1.50 eq) was added and the reaction mixture was stirred at 20-30 °C (for 1.0 h HPLC indicated the reaction conversion > 99.9%). DDTT (34.5 g, 168.6 mmol, 1.10 eq) was added and the reaction mixture was stirred at 20~30 °C for 0.5 h.

In a separated reactor, HF-Py (65.8 g, 2.30 mol HF, 15.0 eq, ~70% HF in pyridine) was slowly added into a solution of imidazole (313.1 g, 4.6 mol, 30.00 eq) in anhydrous THF (0.75 L) at -0±5 °C and stirred at 0±5 °C for 30 min. This HF-imidazole solution slowly added to the reaction mixture from above and the reaction mixture was stirred at 0±5 °C for 2.5 h (HPLC indicated the reaction conversion > 99.8%).

The reaction mixture was filtered to remove 3Å MS and EtOAc (5.0 L) was added. The solution was washed with the 2.5 wt% aqueous NaHCO<sub>3</sub> solution (2 x 3.7 L), brine (5 wt%, 9.0 L), brine (2 x 3.0 L), dried over MgSO<sub>4</sub> (150 g), filtered, and concentrated in vacuo. The crude product was dissolved in EtOAc (1.5 L) and slowly added to IPA (11.3 L). The precipitated product was filtered, washed with IPA (2 x 500 mL) and dried under vacuum at 20-30 °C for 40 h to yield **III** as a lightly yellow solid (323.5 g, 93.6% yield). HRMS calcd for C<sub>100</sub>H<sub>120</sub>N<sub>16</sub>O<sub>34</sub>P<sub>3</sub>S<sub>2</sub><sup>+</sup> [M+H]<sup>+</sup>: 2246.6841, found: 2246.6826.



### 5'-DMTr-MOE-CCoGU-3'- Phosphoramidite, **IIIa**

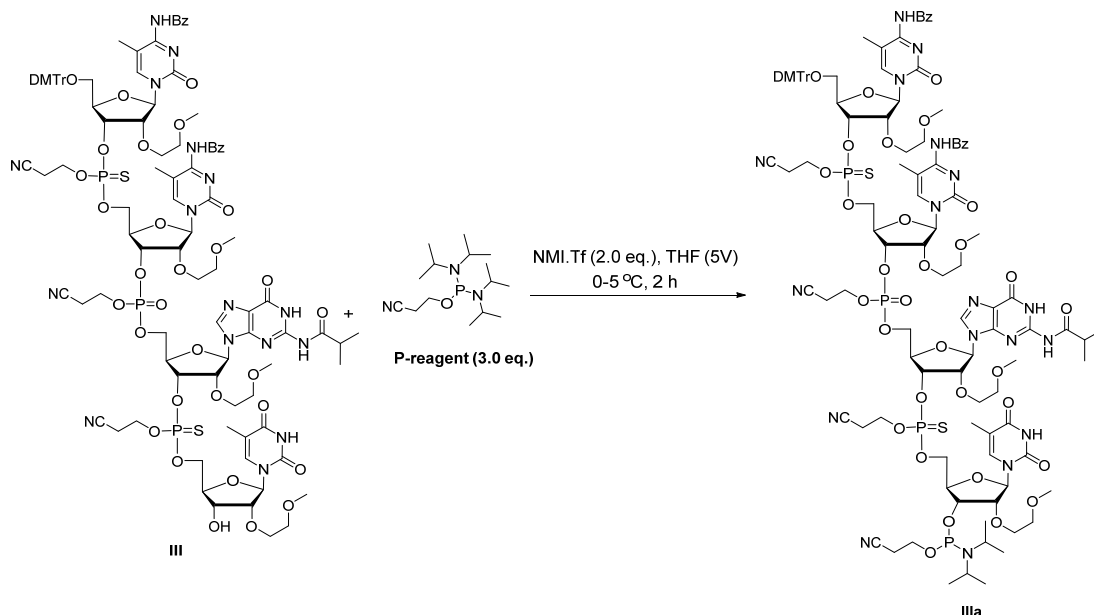

A solution of **III** (100 g, 44.5 mmol) in DCM (500 mL) was evaporated azeotropically on a rotary evaporator at 20-35 °C (vapor temperature) with simultaneous addition of DCM to maintain a constant volume until the water content was <0.05% by Karl Fischer analysis and then concentrated. The dried **III** was dissolved in THF (500 mL) and the solution was cooled down to 0±5 °C. The 2-cyanoethyl tetraisopropylphosphorodiamidite (40.2 gram, 133.5 mmol) and NMI·TFA (20.7 gram, 90.0 mmol) were added. The reaction mixture was stirred at 0±5 °C for 1 h (HPLC indicated the reaction conversion > 99.0%) and added into 5wt % aqueous NaHCO<sub>3</sub> solution (2.0 L). EtOAc (3.0 L) was added with vigorous stirring for 10 min. The organic layer was separated and washed with 5 wt% aqueous NaHCO<sub>3</sub> solution (2.0 L), brine (2 x 1.0 L), dried over Na<sub>2</sub>SO<sub>4</sub> (200 g), filtered, and concentrated in vacuo to about 500 mL. The concentrated crude mixture was added to heptane/MTBE/Pyridine (4.525 L, 2:7:0.025, v/v/v) at 0±5 °C in 30 min with vigorous agitation. The precipitated product was filtered, washed with heptane/TBME (2 x 250 mL, 2:7, v/v) and dried under vacuum at 20-30 °C for 36 h to yield **IIIa** as a white solid (92.5 g, 84.9% yield).

## 4. Synthesis of fragment V

### 5'-DMTr-MOE-U-3'-Succinate, **V-1**

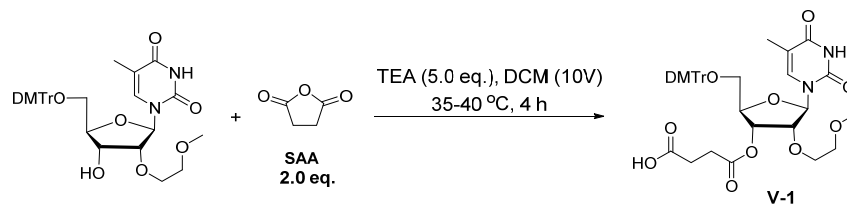

A mixture of 5'-DMT-MOE U (120 g, 194 mmol), TEA (98.16 g, 5.001 eq) and dihydrofuran-2,5-dione (SAA) (38.82 g, 2.0 eq) in DCM (1.20 L, 10V) was stirred for 4.0 h at 35-40 °C (HPLC indicated the reaction conversion > 99.0%). The reaction mixture was washed with the 0.2 M aqueous triethylamine phosphate solution (3 x 1.8 L) and brine (1.8 L). The bottom layer was separated, dried over Na<sub>2</sub>SO<sub>4</sub> (120.0 g), filtered, and concentrated in vacuo. The crude product **V-1** was used directly in the next step without further purification.

### 5'-DMTr-MOE-U-3'-SDG, **V-2**

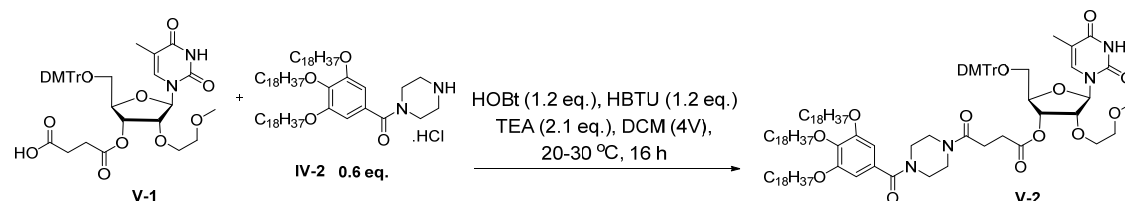

To a solution of **IV-2** (120 g, 115 mmol) in DCM (480 mL), TEA (41.22 g, 2.100 eq.), **V-1** (139.4 g, 191 mmol), HBTU (88.30 g, 1.200 eq) and HOBT (31.44 g, 1.200 eq) were added (Note: the order of reagent addition was essential in this step), the reaction mixture was stirred at 20-30 °C for 16 h (HPLC indicated the reaction conversion > 99.0%), and concentrated to about 250 mL. The concentrated reaction mixture was slowly added to ACN (2.4 L) in 0.5 h with vigorous agitation at 20-30 °C. The precipitated product was filtered, washed with ACN (2 x 120 mL) and dried under vacuum at 27-33 °C for 56 h to give an off-white solid **V-2** (188.16 g, 95.3% yield).

### 5'-OH-MOE U-3'-SDG, **V**

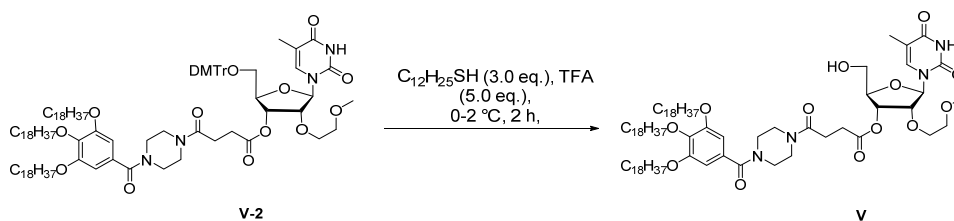

A solution of **V-2** (180.00 g, 106 mmol) in DCM (1.8 L, 10V) was cooled down to 0-5 °C, 1-dodencanethiol (64.43 g, 3.0 eq) and TFA (60.49 g, 5.0 eq.) were added slowly. The reaction mixture was stirred at 0±5 °C for 2 h (HPLC indicated the reaction conversion > 99.0%). Pyridine (58.75 g, 7.0 eq) was added slowly at 0±5 °C and the reaction mixture was added to ACN (5.4 L, 30 V) slowly at 0±5 °C with vigorous agitation. The precipitated product was filtered, washed with ACN (2 x 180 mL, 2V) and dried under vacuum at 20-30 °C for 40 h to give a white solid **V** (154.09 g, 104.2% yield).

## 5. Synthesis of fragment VI

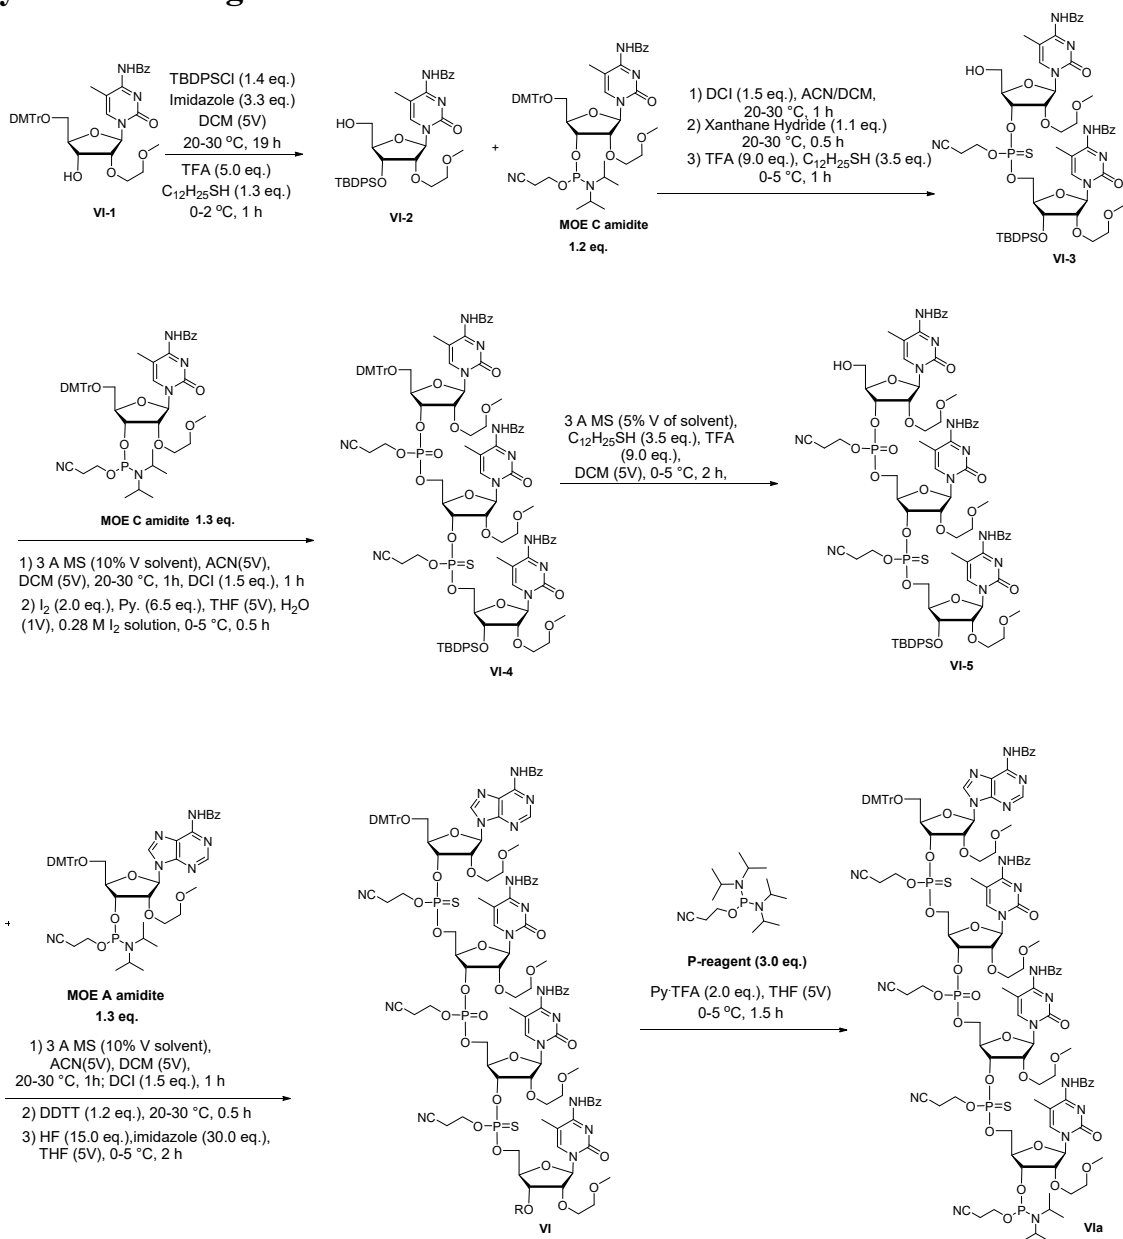

**Scheme 4.** *Synthesis route of fragment VI*

### 5'-OH-MOE C-3'-TBDPS, VI-2

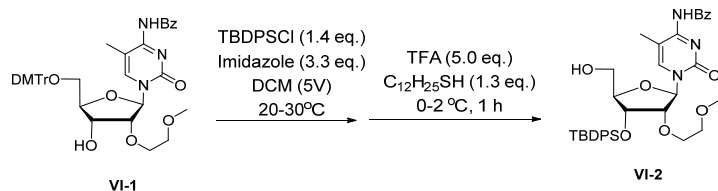

A mixture of compound **VI-1** (100 g, 138.6 mmol, 1.00 eq), DCM (500 mL), imidazole (31.1 g, 457 mmol, 3.30 eq), and TBDPSCl (53.3 g, 194 mmol, 1.40 eq) was stirred at 25 °C for 20 h (HPLC indicated compound **VI-1** was consumed > 99.9%). IPA (8.3 g, 138.6 mmol, 1.00 eq) was added and the mixture was stirred at 25 °C for 0.5 h, cooled to 0 ± 5 °C, and 1-dodecanethiol (36.5 g, 180 mmol, 43.1 mL, 1.30 eq) was added. TFA (79 g, 693 mmol, 53.0 mL, 5.00 eq) was added dropwise in 0.5 h, and the mixture was stirred at 0 °C for 1 h (HPLC indicated the reaction conversion > 99.9%). The reaction mixture was added into aqueous Na<sub>2</sub>CO<sub>3</sub> solution (44.1 g Na<sub>2</sub>CO<sub>3</sub> dissolved in 500 mL of deionized water) in 30 min with vigorous stirring. The organic layer was separated, washed with brine (2 x 300 mL), dried over anhydrous MgSO<sub>4</sub> (100 g), filtered, and concentrated in vacuo. The crude product was dissolved in DCM (150 mL) and added to a mixture of heptane-TBME (2.85 L, 18:1, v/v). The precipitated product was filtered and washed with heptane (2 x 100 mL), dried under vacuum at 20-30 °C for 36 h to yield **VI-2** as a white solid (83.10 g, 91.2% yield). HRMS calcd for C<sub>36</sub>H<sub>43</sub>N<sub>3</sub>O<sub>7</sub>Si<sup>+</sup> [M+H]<sup>+</sup>: 658.2949, found: 658.2869.

### 5'-OH-MOE CC-3'-TBDPS, VI-3

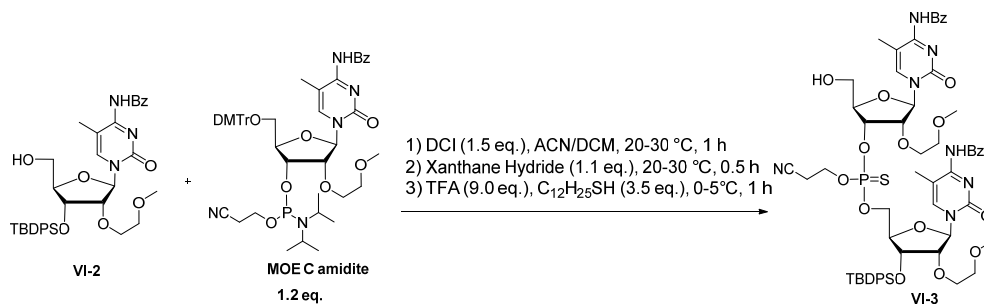

A mixture of **VI-2** (120 g, 182.6 mmol, 1.00 eq), ACN/DCM (1200 mL, 1:1, v/v), MOE C amidite (201.8 g, 219.1 mmol, 1.20 eq) and 3 Å MS (120.0 g) was stirred at 20-30 °C for 1 h and then DCI (32.3 g, 273.9 mmol, 1.50 eq) was added. The mixture was stirred at 20-30 °C for 1.0 h (HPLC indicated the reaction conversion > 99.9%). After xanthane hydride (30.2 g, 200.9 mmol, 1.10 eq) was added the mixture was stirred at 20-30 °C for 0.5 h. The reaction mixture was cooled to 0 ± 5 °C, dodecane-1-thiol (129.2 g, 639.1 mmol, 3.50 eq) and TFA (187.0 g, 1.64 mol, 9.00 eq) were added sequentially and stirred at 0 ± 5 °C for 2 h (HPLC indicated the reaction conversion > 99.9%). The reaction mixture was filtered to remove 3 Å MS and the filtrate was added into Na<sub>2</sub>CO<sub>3</sub> solution (80.0 g Na<sub>2</sub>CO<sub>3</sub> dissolved in 1.20 L DI water) in 30 min with vigorous stirring. To the mixture was added a mixture of EtOAc/TBME (3.6 L, 1:2, v/v) at 0-15 °C and stirred vigorously for 10 min. The organic layer was separated and washed with aqueous NaHCO<sub>3</sub> solution (5%wt, 2 x 1.2 L), brine (1.2 L) and concentrated on a rotary evaporator. The residue was dissolved in ACN (600 mL) and water (360 mL) was added. The mixture was extracted with a mixture of heptane/TBME (1.2 L, 4:1, v/v). The bottom layers were collected and mixed with TBME (720 mL) and water (300 mL). The organic layer (upper layer) was separated, washed with brine (360 mL) and concentrated. The residue was dissolved in DCM (1.2 L) and filtered through a silica gel pad (300~400 mesh, 600 g) and the pad was washed with a mixture of EtOAc/DCM (7.2 L, 1:1, v/v). All the filtrates were collected and concentrated. The residue was redissolved in EtOAc (360 mL) and slowly added into the mixture of diisopropyl ether/heptane (5.4 L, 1:4, v/v). The product

precipitated was filtered, washed with heptane (2 x 120 mL)), dried under vacuum at 20-30 °C for 40 h to yield **VI-3** as a white solid (225.5 g, 102.3% yield). HRMS calcd for C<sub>59</sub>H<sub>70</sub>N<sub>7</sub>O<sub>15</sub>PSSi<sup>+</sup> [M+H]<sup>+</sup>: 1208.4236, found: 1208.4189.

#### 5'-DMTr-MOE CoCC-3'-TBDPS, VI-4

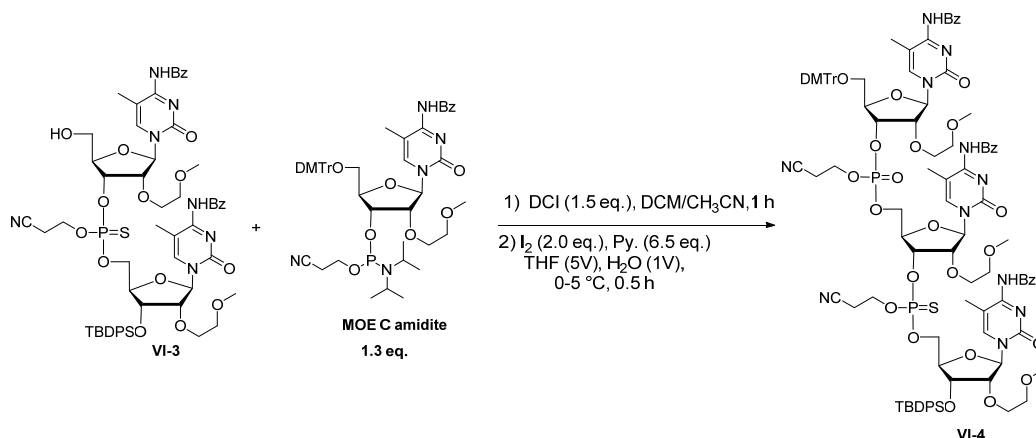

A mixture of **VI-3** (210 g, 174 mmol, 1.00 eq), ACN/DCM (2100 mL, 1:1, v/v), MOE C amidite (208.3 g, 226.2 mmol, 1.30 eq) and 3 Å MS (210.0 g) was stirred at 20-30 °C for 1 h, and then DCI (30.8 g, 161.0 mmol, 1.50 eq) was added and stirred for 1.0 h at 20-30 °C (HPLC indicated the reaction conversion > 99.9%). A solution of iodine (88.2 g, 348.0 mmol, 2.00 eq) and pyridine (89.4 g, 1131.0 mmol, 6.50 eq) in THF/H<sub>2</sub>O (1260 mL, 5:1, v/v) was added to the reaction mixture dropwise at 0 ± 5 °C in 30 min and stirred at 0 ± 5 °C for 30 min. An aqueous solution of 4 % Na<sub>2</sub>S<sub>2</sub>O<sub>3</sub> solution (86.3 g, 348.0 mmol, 2.00 eq) was charged dropwise to the reaction mixture at 0 ± 5 °C and stirred at 15-25 °C for 10 min. A mixture of EtOAc/TBME (6.3 L, 1:2, v/v) was added and stirred vigorously for 30 min. The organic layer was separated, washed with 5 % NaHCO<sub>3</sub> aqueous solution (2 x 2.10 L) and brine (2.10 L), dried over MgSO<sub>4</sub> (210 g), filtered, and concentrated in vacuo to yield the crude product **VI-4** (~335.4 g). **VI-4** was used into the next step without further purification.

#### 5'-OH-MOE CoCC-3'-TBDPS, VI-5

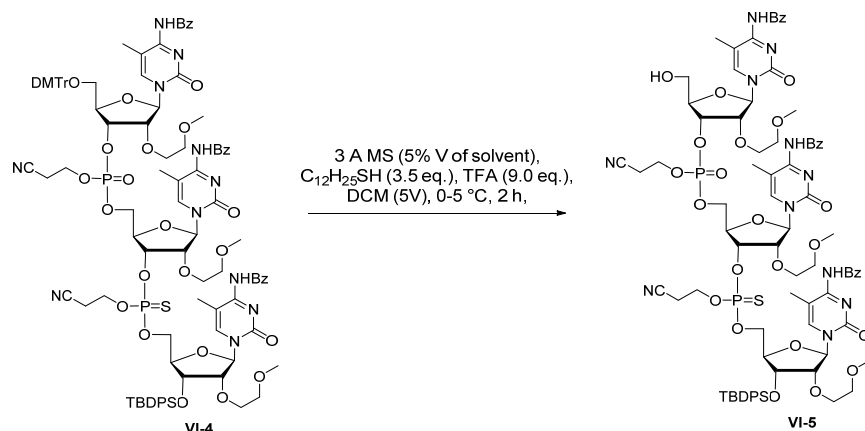

A mixture of compound **VI-4** (335.4 g, 164.2 mmol, 1.00 eq), DCM (1.67 L), and 3 Å MS (83.7 g) was stirred at 25 °C for 1 h, cooled to 0 ± 5 °C and 1-dodecanethiol (116.1 g, 574.7 mmol, 3.5 eq) was added. TFA (168.3 g, 1477 mmol, 9.00 eq) was added dropwise at 0 ± 5 °C in 0.5 h and the mixture was stirred at 0 ± 5 °C for 2 h (HPLC indicated the reaction conversion > 99.9%). After removal of the 3 Å MS by filtration, the reaction mixture was slowly added into an aqueous Na<sub>2</sub>CO<sub>3</sub> solution (95.6 g Na<sub>2</sub>CO<sub>3</sub> dissolved in 1000 mL DI water) with vigorous stirring. The mixture was then extracted with a mixture of EtOAc/MTBE (4200 mL, 1:1, v/v). The organic layer was separated, washed with 5% aqueous NaHCO<sub>3</sub> solution (2 x 1000 mL) and brine (1000 mL), dried over anhydrous MgSO<sub>4</sub> (210 g), filtered, and concentrated in vacuo. The concentrated crude product was dissolved in EtOAc (630 mL) and slowly added to a mixture of heptane/TBME (9.45 L, 4:1, v/v). The product precipitated was filtered, washed with heptane/TBME, 2 x 210 mL, 4:1, v/v) and dried under vacuum at 20-30 °C for 40 h to yield **VI-5** as a white solid (253.5 g, 83.7% yield). HRMS calcd for C<sub>82</sub>H<sub>97</sub>N<sub>11</sub>O<sub>24</sub>P<sub>2</sub>SSi<sup>+</sup> [M+H]<sup>+</sup>: 1742.5751, found: 1742.5732.

### 5'-DMTr-MOE ACoCC-3'-OH, VI

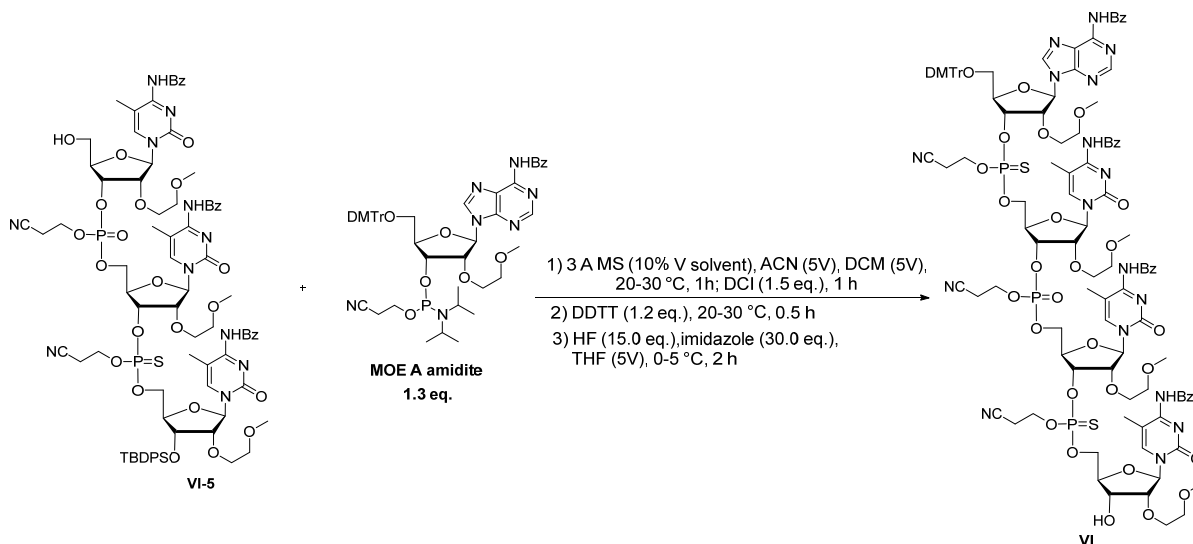

A mixture of **VI-5** (245.0 g, 140.0 mmol, 1.00 eq), ACN/DCM (2450 mL, 1:1, v/v), MOE A amidite (170.3 g, 182.0 mmol, 1.30 eq) and 3 Å MS (245.0 g) was stirred at 20-30 °C for 1 h and DCI (24.9 g, 210.0 mmol, 1.50 eq) was added. The mixture was stirred at 20-30 °C for 1.0 h (HPLC indicated **VI-5** conversion > 99.8%). IPA (0.85 g, 14.0 mmol, 0.1 eq) was added and the mixture was stirred at 20-30 °C for 10 min. DDTT (34.6 g, 168.0 mmol, 1.20 eq) was added and the mixture was stirred at 20~30 °C for 0.5 h.

To a separated reactor containing the solution of imidazole (287.10 g, 4.2 mol, 30.00 eq) in anhydrous THF (1225 mL) at 0 ± 5 °C was added HF•Py (60.2 g, 15 eq., ~70% HF in pyridine) slowly and the mixture was stirred at 0 ± 5 °C for 30 min to yield a homogeneous solution. This freshly prepared HF-imidazole solution was slowly added into the reaction mixture above and the mixture was stirred at 0 ± 5 °C for 2 h (HPLC indicated the reaction conversion > 99.8%). EtOAc (4.9 L) was added and the 3 Å MS was removed by filtration. The filtrate was washed with 2.5%

NaHCO<sub>3</sub> aqueous solution (2 x 2.45 L) and brine (2.45 L), dried over anhydrous MgSO<sub>4</sub> (210 g), filtered, and concentrated in vacuo. The concentrated crude product was dissolved in EtOAc (1225 mL) and slowly added to a mixture of EtOH/heptane (18.5 L, 2:3, v/v). The precipitated product was filtered, washed with TBME (2 x 245 mL), dried under vacuum at 20-30 °C for 40 h to yield **VI** as a slightly yellow solid (292.3 g, 87.8% yield). HRMS calcd for C<sub>110</sub>H<sub>123</sub>N<sub>17</sub>O<sub>33</sub>P<sub>3</sub>S<sub>2</sub><sup>+</sup> [M+H]<sup>+</sup>: 2367.7157, found: 2367.7173.

### 5'-DMTr-MOE ACoCC-3'-Phosphoramidite, **Via**

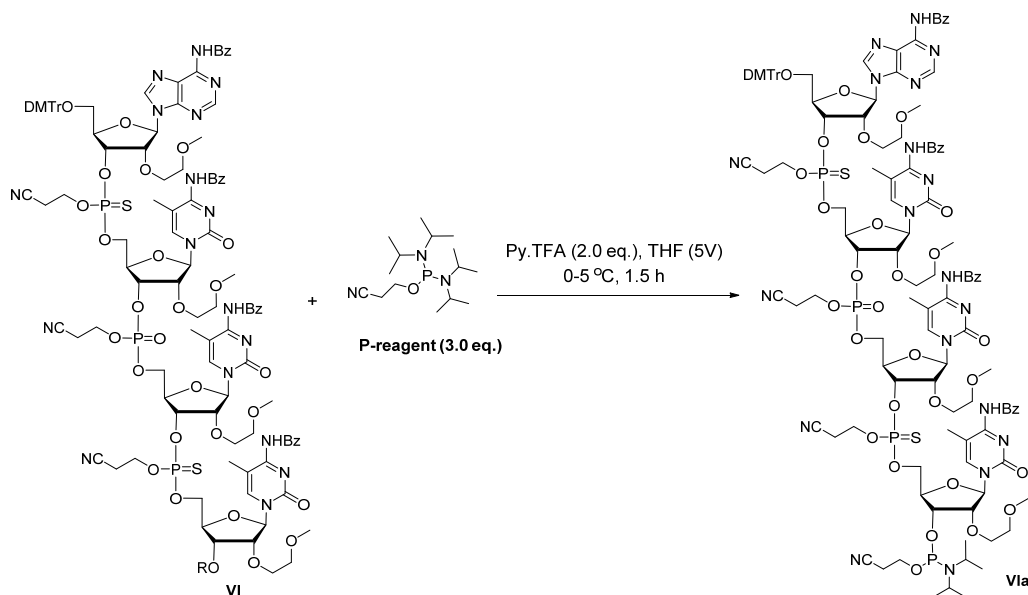

A solution of **VI** (280 gram, 118.4 mmol) in DCM (1000 mL) was azeotropically distilled on a rotary evaporator with continuous addition of DCM (total ~ 2 L) until the water content of the solution was <0.05% by Karl Fischer analysis. After removal of the DCM, THF (1400 mL) was added. The mixture was cooled to 0 ± 5 °C, and then 2-cyanoethyl tetraisopropylphosphorodiamidite (106.7 gram, 355mmol) and Py•TFA (45.7 gram, 236.8 mmol) were added and stirred at 0 ± 5 °C for 1 h until the conversion of **VI** was > 99% (monitored by HPLC).

The reaction mixture was added into TBME/heptane (14 L, 5:2, v/v) 0 ± 5 °C in 30 min under vigorous stirring and stirred for 30 min at the same temperature. Precipitation began immediately when addition started. The product was filtered, washed with heptane/TBME (2 x 700 mL, 5:2, v/v), and dried under vacuum at 20-30 °C for 24 h to yield **Via** as a white solid (292.3 gram, yield 96.3%).

## 6. Synthesis of compounds IV, VII, VIII, and X

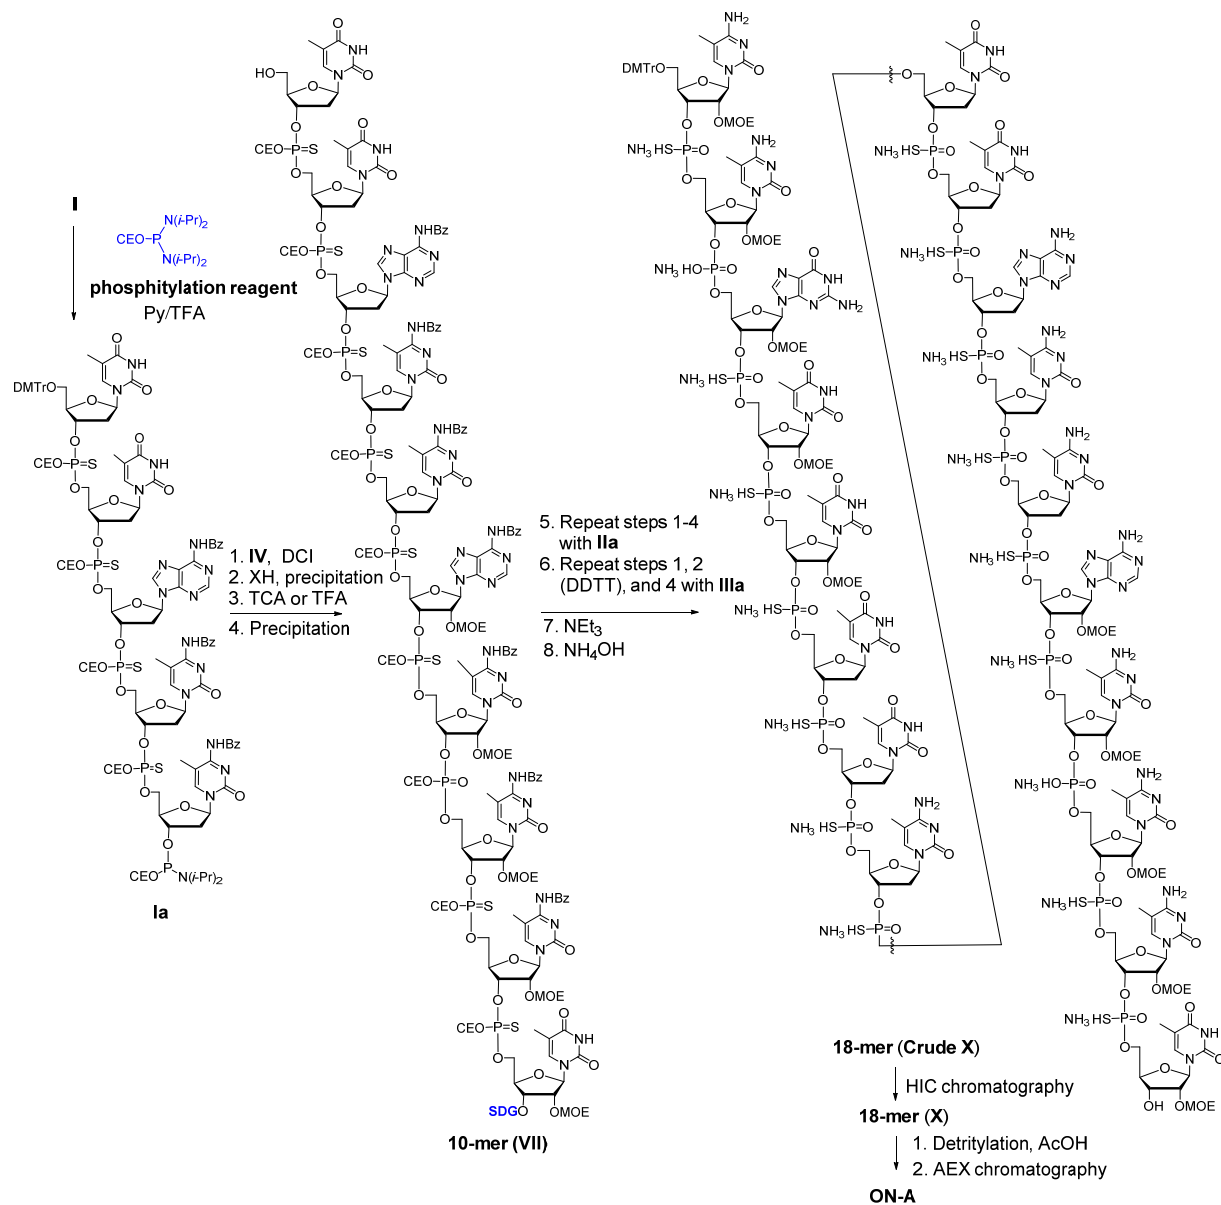

**Scheme 5.** Convergent assembly of **ON-A**

**5'-DMTr-MOE-ACoCCU-3'-SDG, DMT-on IV**



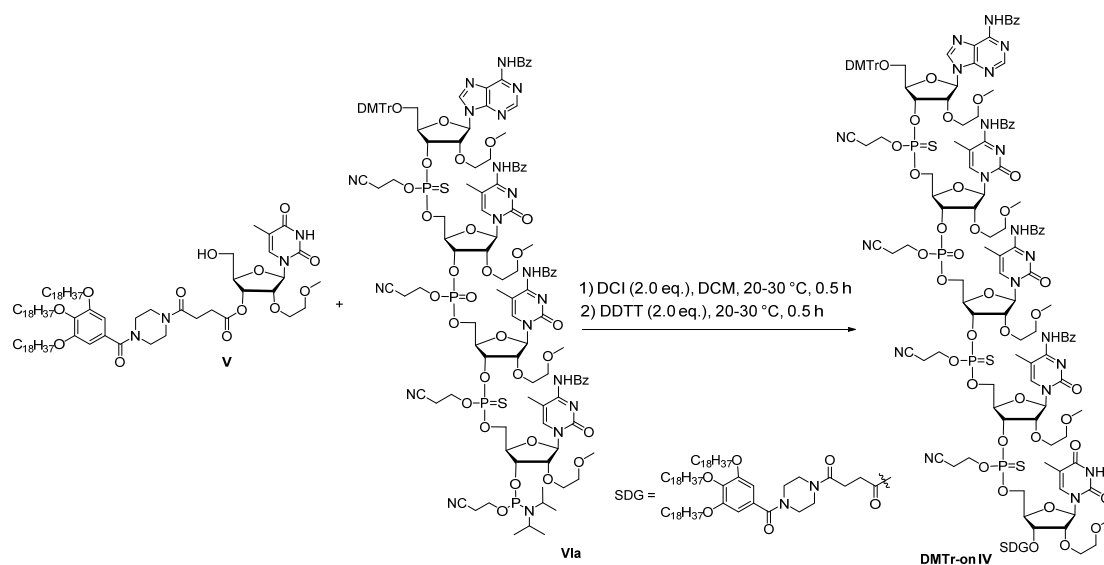

A mixture of **V** (120.0 g, 86.1 mmol), **VIa** (280.7 g, 109.4 mmol), 3 Å MS (10 g/100mL, 300 g), and DCM (3.0 L) under N<sub>2</sub> atmosphere was stirred at 20-25 °C for 1.0 h. DCI (20.33 g, 172.2 mmol) was added and the reaction mixture was stirred for 1.0 h at 20-30 °C (TLC and HPLC indicated the reaction conversion > 99.9%). DDTT (35.35 g, 172.2 mmol) was added and the reaction mixture was stirred at 20-25 °C for 30 min. The reaction mixture was filtrated and 3 Å MS was washed with DCM (2 x 300 mL). The combined filtrate was concentrated to about 600 mL on a rotary evaporator and added to ACN (9.0 L) in 30 min with vigorous agitation. The precipitated product was filtered, washed with ACN (2 x 600 mL) and dried under vacuum at 20-30 °C for 48 h to yield **DMTr-on IV** as a lightly yellow solid (287.1 g, 85.7% yield).

### 5'-OH-MOE-ACoCCU-3'-SDG, IV

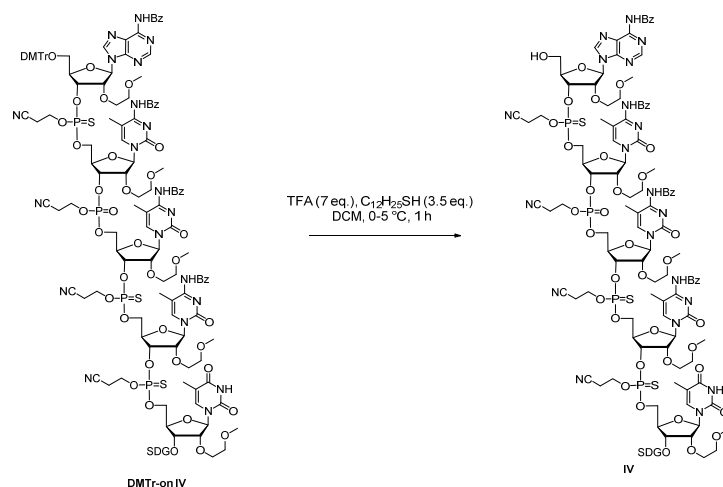

A mixture of **DMTr-on IV** (285.5 g, 79.4 mmol), 3 Å MS (142.0 g) and DCM (2855 mL) was stirred at 20-25 °C for 1.0 h under N<sub>2</sub> atmosphere and cooled to 0±5 °C. Dodecane-1-thiol (51.9 g, 278 mmol) was added and the reaction mixture was stirred at 0±5 °C for 10 min. TFA (58.6 g, 555.8 mmol) was added slowly and the reaction mixture was stirred at 0±5 °C for 1.0 h (TLC and HPLC indicated the reaction conversion > 99.9%). NMI (54.2 g, 714.6 mmol) was added in 10

## IV ammonolysis

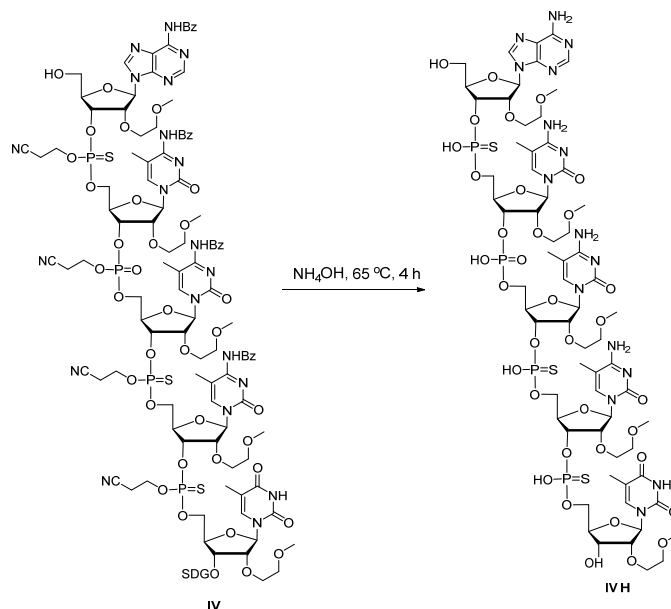

### 5'-DMTr-10-mer-3'-SDG, DMT-on VII

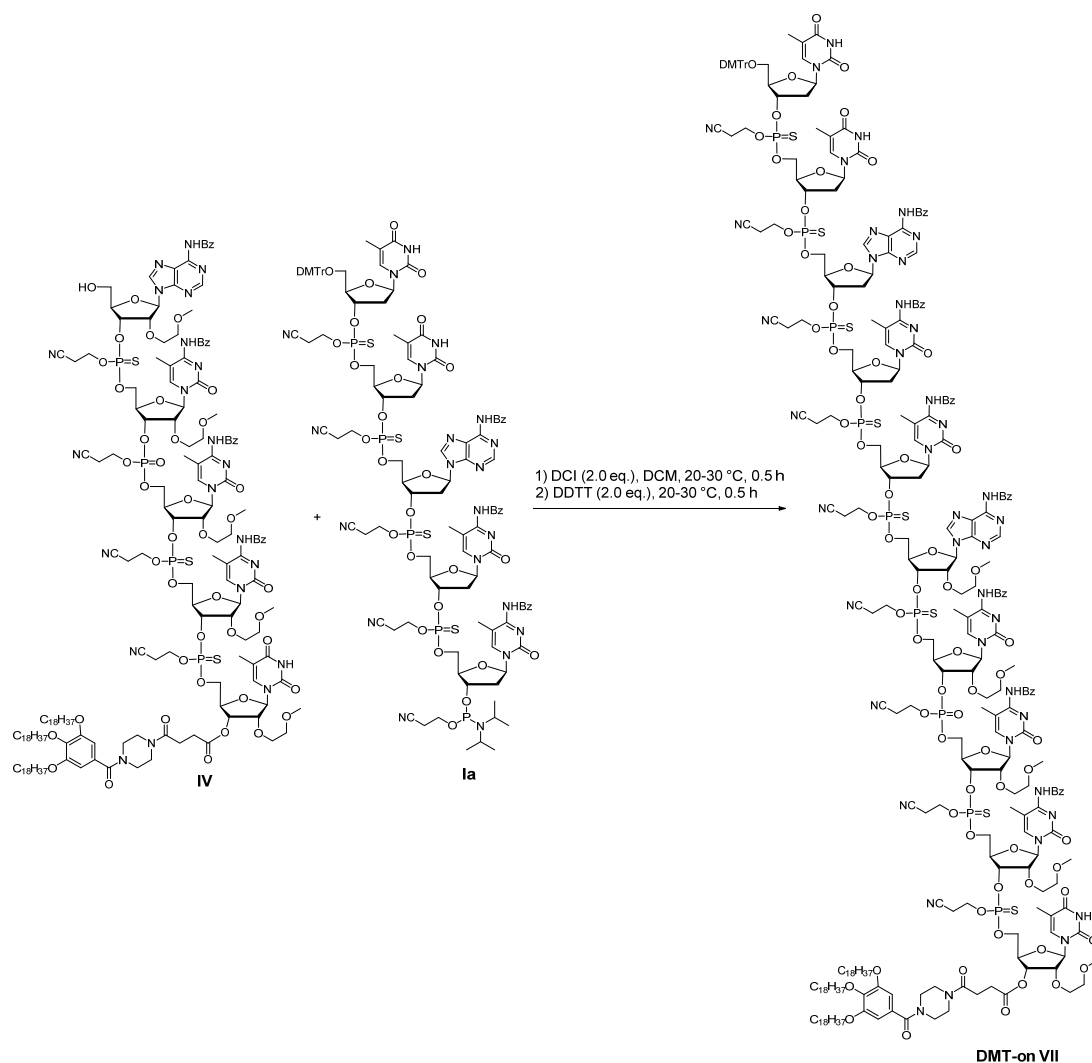

A mixture of **IV** (227.0 g, 63.1 mmol), **Ia** (210.2 g, 82.2 mmol), 3Å MS (255.4 g) and ACN/ DCM (1.7 L, 1:2, v/v) was stirred at 20-25 °C for 1.0 h under N<sub>2</sub> atmosphere. DCI (18.7 g, 158.1 mmol) was added, and the reaction mixture was stirred for 1.0 h (TLC and HPLC indicated the reaction conversion > 99.9%). DDTT (19.5 g, 94.8 mmol) was added and the reaction mixture was stirred at 20-25 °C for 30 min. The reaction mixture was filtrated and the 3Å MS filter cake was washed with DCM (2 x 250 mL). The combined filtrate was concentrated to about 1200 mL on a rotary evaporator and added to ACN (10 L) in 30 min with vigorous agitation at 0±5 °C. The precipitated product was filtered, washed with ACN (2 x 1.0 L) and dried under vacuum at 20-30 °C for 80 h to yield **DMT-on VII** as a slightly yellow solid (384.7 g, 100.1% yield).

## 5'-OH-10-mer-3'-SDG, VII

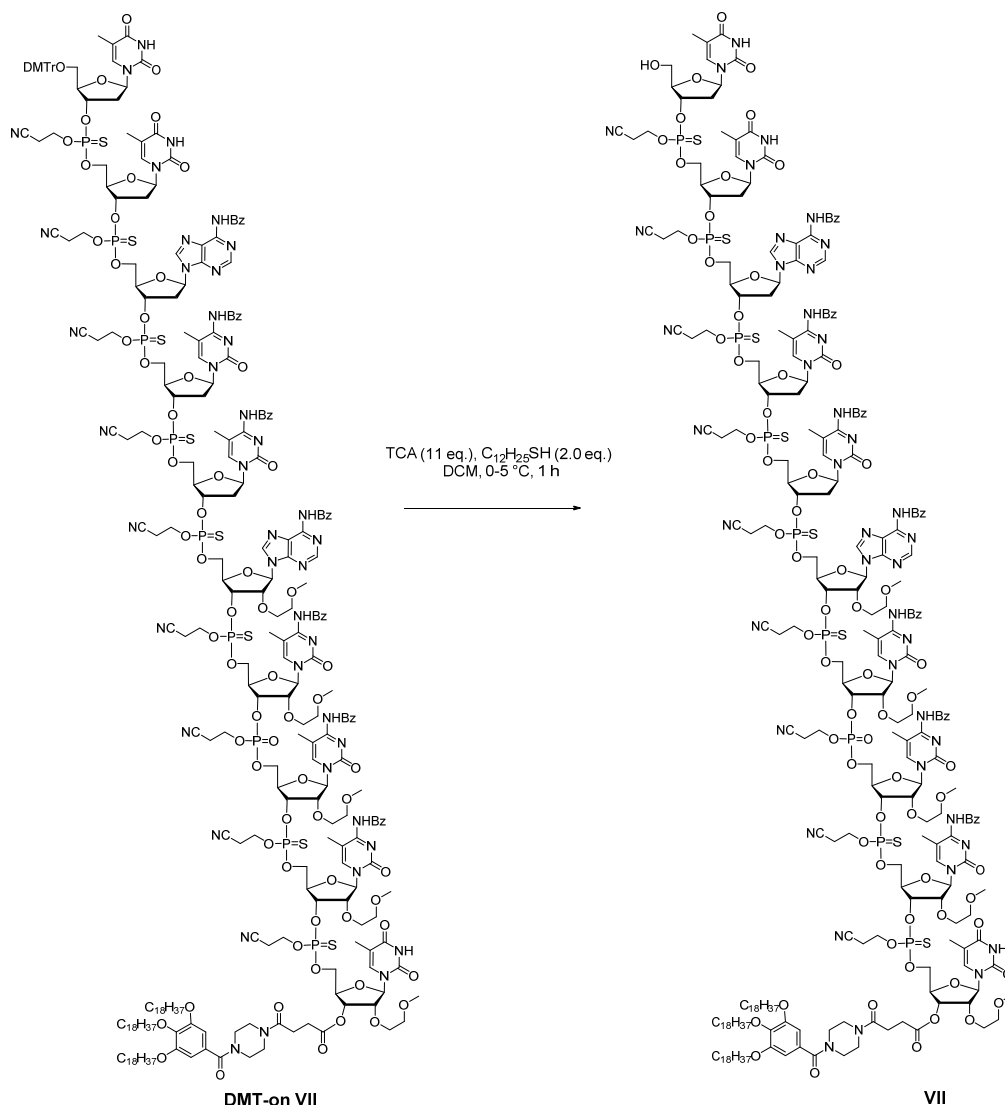

A mixture of **DMT-on VII** (380.0 g, 62.5 mmol), 3Å MS (142.0 g) and DCM (2660 mL) was stirred at 20-25 °C for 1.0 h under N<sub>2</sub> atmosphere and cooled to 0±5 °C. Dodecane-1-thiol (26.3 g, 125 mmol) was added and the reaction mixture was stirred at 0 °C for 10 min. TCA (112.3 g, 687.5 mmol) was added slowly and the reaction mixture was stirred at 0±5 °C for 1.5 h (TLC and HPLC indicated the reaction conversion > 99.9%). NMI (67.7 g, 825 mmol) was added in 10 min, the reaction mixture was filtered to remove 3Å MS, concentrated to about 1000 mL on rotary evaporator and added to ACN (13.6 L) in 30 min with vigorous agitation at 0±5 °C. The precipitated product was filtered, washed with ACN (2 x 1000 mL) and dried under vacuum at 20-30 °C for 48 h to yield **VII** as a white solid (314.5 g, 87.1% yield).

## VII ammonolysis

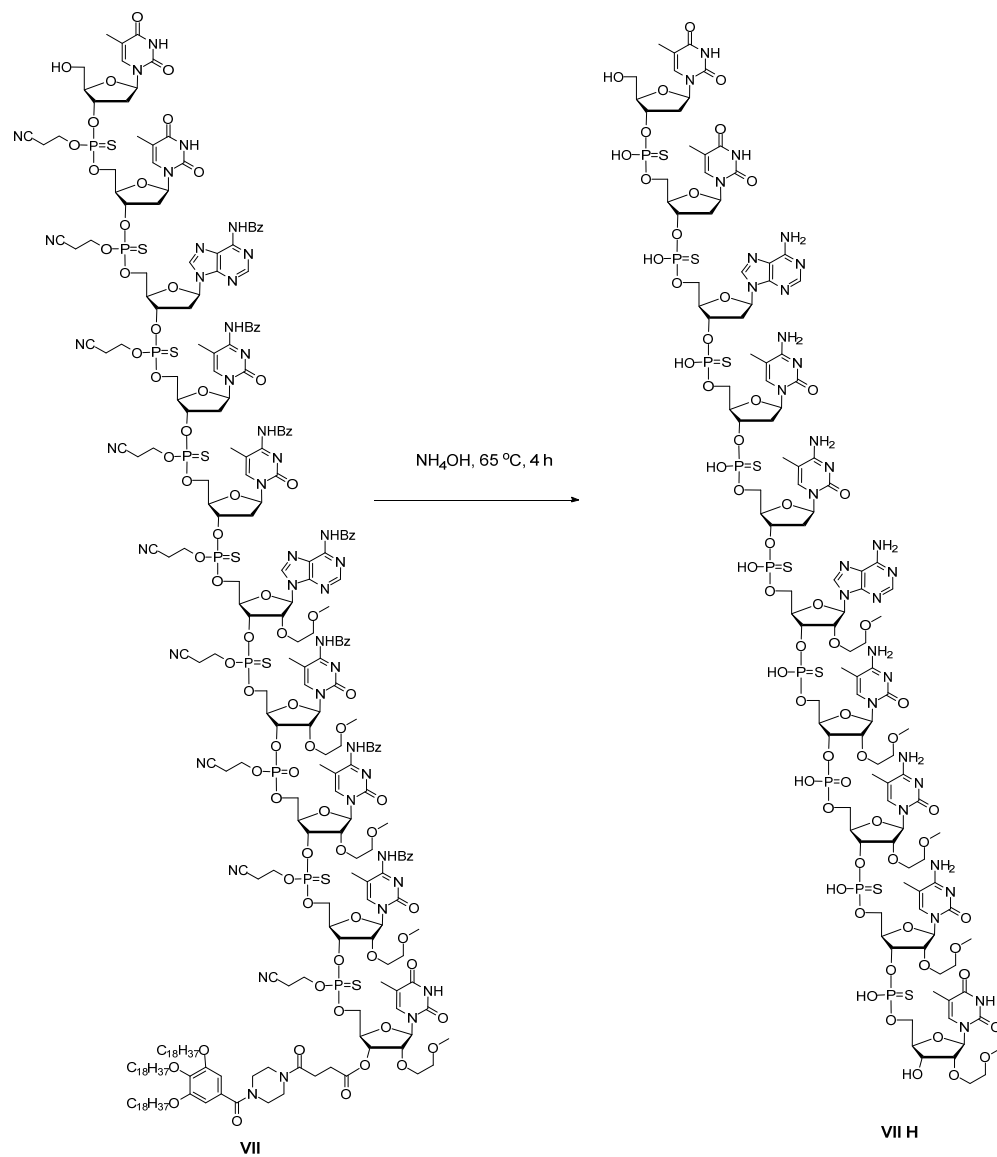

Preparation of **VII H**: The mixture of **VII** (0.2 g) and 30%  $\text{NH}_4\text{OH}$  (2 mL) in a 10 mL pressure flask was stirred at 65 °C for 4 h. The structure of **VII H** was confirmed by LCMS. HRMS calcd for  $\text{C}_{115}\text{H}_{161}\text{N}_{31}\text{O}_{61}\text{P}_9\text{S}_8/3^-$   $[\text{M}-3\text{H}]/3$ : 1162.5295, found: 1162.5245.

## 5'-DMTr-14-mer-3'-SDG, DMT-on VIII

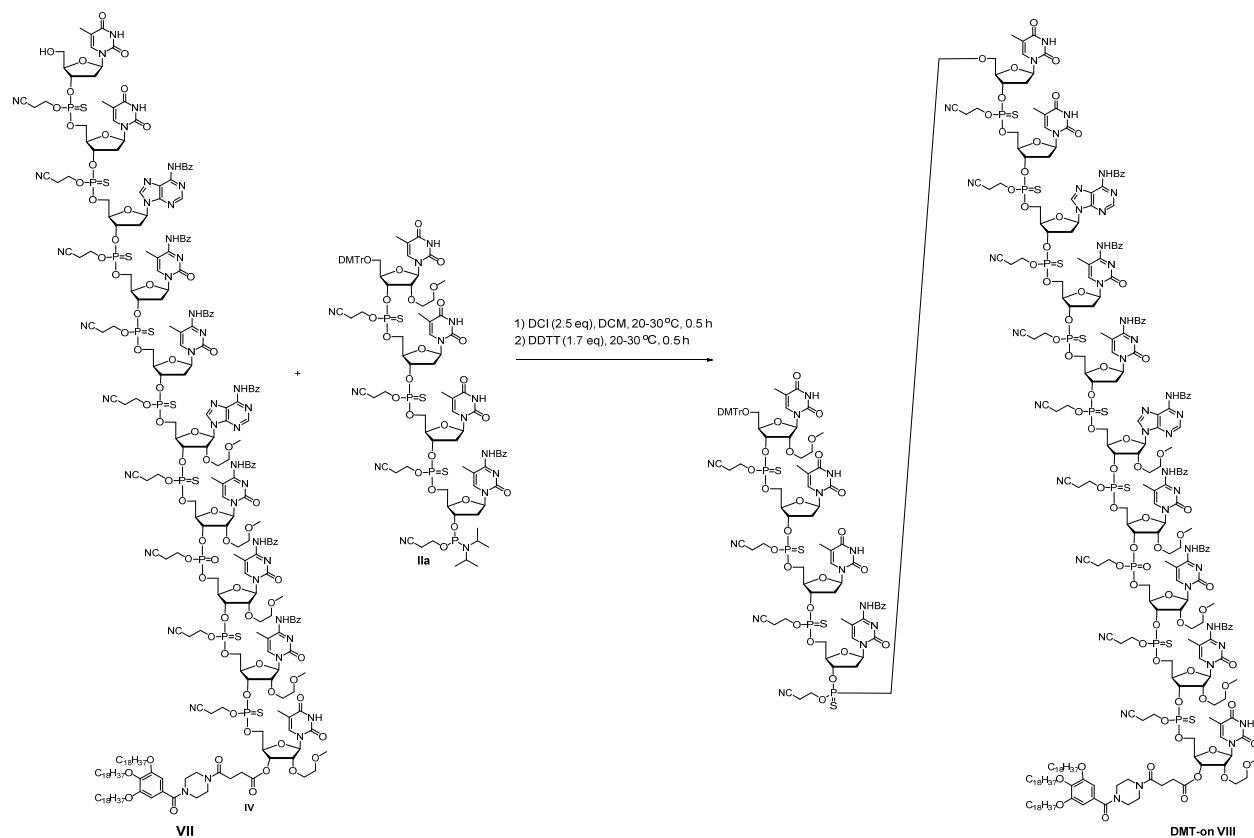

A mixture of **VII** (295.0 g, 51.1 mmol), **IIa** (146.1 g, 71.5 mmol), 3 Å MS (331.9 g) and ACN/DCM (2213 mL, 1:2, v/v) was stirred at 20-25 °C for 1.0 h under N<sub>2</sub> atmosphere. DCI (15.1 g, 127.7 mmol) was added and the reaction mixture was stirred for 1.0 h (TLC and HPLC indicated the reaction conversion > 99.9%). DDTT (17.8 g, 86.9 mmol) was added and the reaction mixture was stirred at 20-25 °C for 30 min. DCM (885 mL) was added and the reaction mixture was filtrated and the 3 Å MS filter cake was washed with DCM (2 x 300 mL). The combined filtrate was concentrated to about 1200 mL on a rotary evaporator and slowly added to ACN (10 L) in 30 min with vigorous agitation at 0±5 °C. The precipitated product was filtered, washed with ACN (3 x 850 mL) and dried under vacuum at 20-30 °C for 48 h to yield **DMT-on VIII** as a light yellow solid (336.8 g, 85.1% yield).

## DMT-on VIII ammonolysis

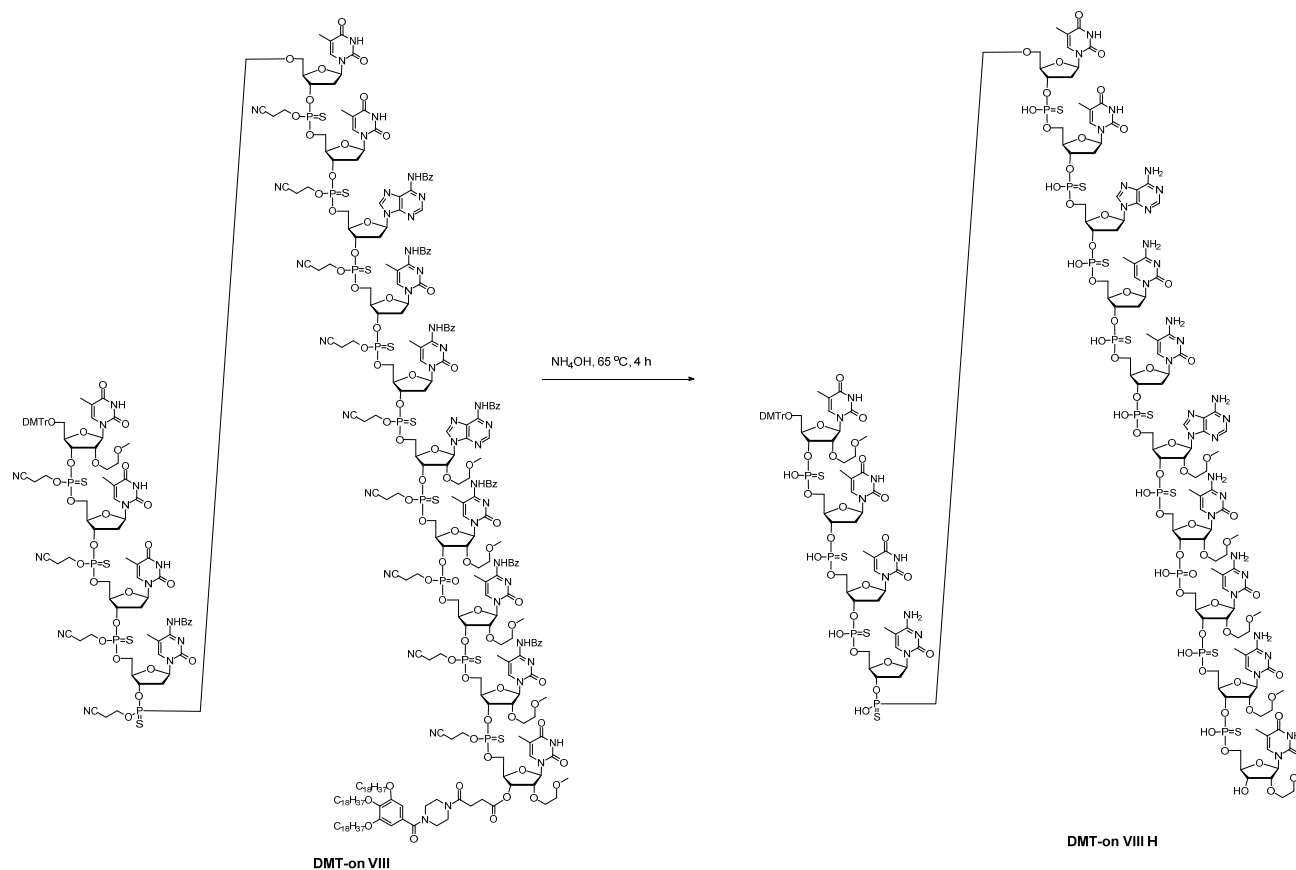

Preparation of **DMT-on VIII H**: a mixture of **DMT-on VIII** (0.2 g) and 30%  $\text{NH}_4\text{OH}$  (2 mL) in a 10 mL pressure flask was stirred at 65 °C for 4 h. The structure of **DMT-on VIII H** was confirmed by LCMS. HRMS calcd for  $\text{C}_{179}\text{H}_{237}\text{N}_{40}\text{O}_{88}\text{P}_{13}\text{S}_{12}/4^-$   $[\text{M}-4\text{H}]/4$ : 1285.4642, found: 1285.4613.

## 5'-OH-14-mer-3'-SDG, VIII

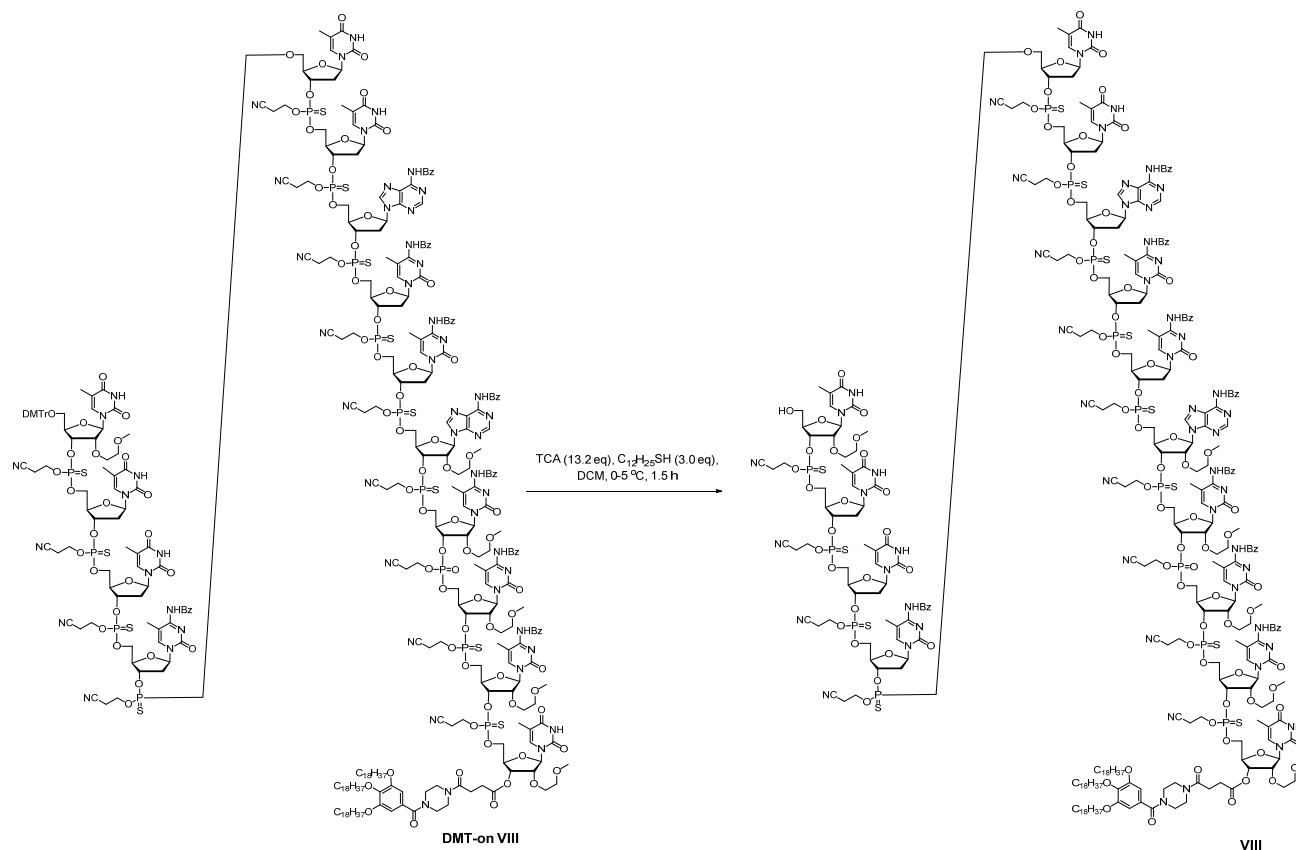

A mixture of **DMT-on VIII** (320.0 g, 41.4 mmol), 3 Å MS (112.0 g) and DCM (2240 mL) was stirred at 20-25 °C for 1.0 h under N<sub>2</sub> atmosphere and cooled down to 0±5 °C. Dodecane-1-thiol (25.1 g, 124.2 mmol) was added, and the reaction mixture was stirred at 0 °C for 10 min. TCA (89.1 g, 546.5 mmol) was added slowly and the reaction mixture was stirred at 0±5 °C for 1.5 h (TLC and HPLC indicated the reaction conversion > 99.9%). NMI (55.9 g, 683.1 mmol) was added in 10 min, and the reaction mixture was filtered, and the 3 Å MS filter cake was washed with DCM. The combined filtrate was concentrated to about 1200 mL on a rotary evaporator and added to ACN (17.0 L) in 30 min with vigorous agitation at 0±5 °C. The precipitated product was filtered, washed with ACN (2 x 650 mL) and dried under vacuum at 20-30 °C for 48 h to yield **VIII** as a white solid (286.0 g, 93.0% yield).



## VIII ammonolysis

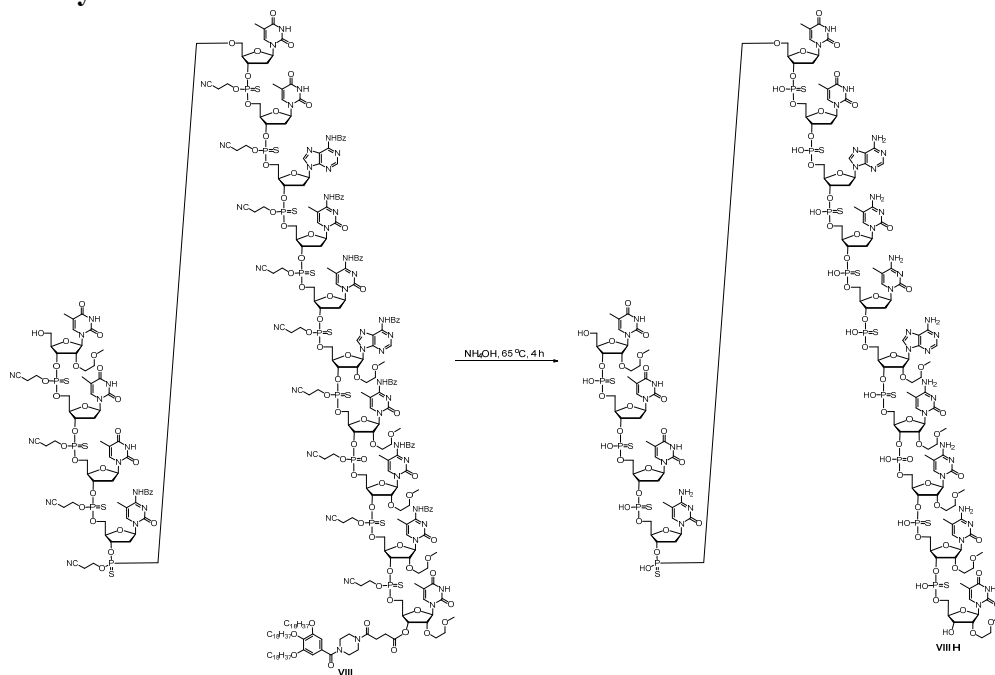

Preparation of **VIII H**. a mixture of **VIII** (0.2 g) and 30%  $\text{NH}_4\text{OH}$  solution (2 mL) in a 10 mL pressure flask was stirred at 65 °C for 4 h. The structure of **VIII H** was confirmed by LCMS. HRMS calcd for  $\text{C}_{158}\text{H}_{219}\text{N}_{40}\text{O}_{86}\text{P}_{13}\text{S}_{12}/4^-$   $[\text{M}-4\text{H}]/4$ : 1209.9316, found: 1209.9237.

## 5'-DMTr-18-mer-3'-SDG, IX

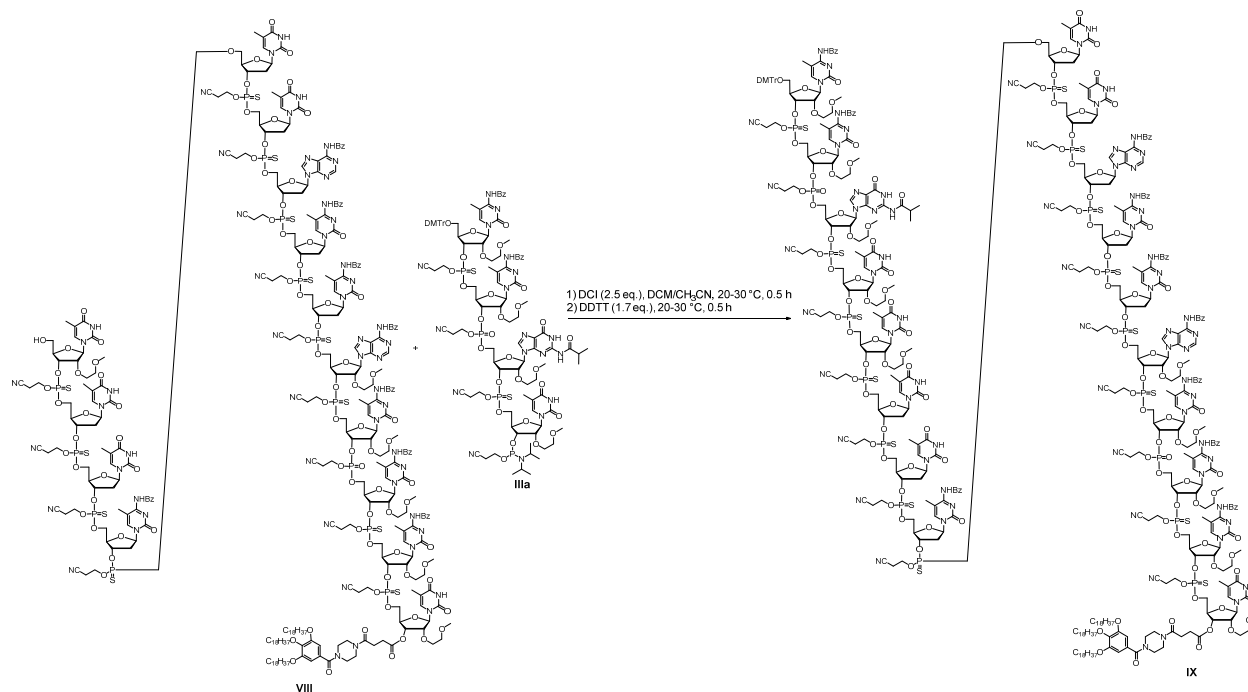

A mixture of **VIII** (150.0 g, 20.2 mmol), **IIIa** (74.0 g, 30.3 mmol), 3Å MS (168.7 g) and DCM (1125 mL, 1:2, v/v) was stirred at 20-25 °C for 1.0 h under N<sub>2</sub> atmosphere. DCI (5.95 g, 50.5 mmol) was added and the reaction mixture was stirred for 1.0 h (TLC and HPLC indicated the reaction conversion > 99.9%). DDTT (7.03 g, 34.3 mmol) was added and the reaction mixture was stirred at 20-25 °C for 30 min. DCM (450 mL) was added and the reaction mixture was filtrated and 3Å MS filter cake was washed with DCM (2 x 150 mL). The combined reaction mixture was concentrated to about 1000 mL on a rotary evaporator and slowly added to ACN (9.0 L) in 30 min with vigorous agitation at 0±5 °C. The precipitated product was filtered, washed with ACN (2 x 550 mL) and dried under vacuum at 20-30 °C for 60 h to yield **IX** as a light yellow solid (181.0 g, 91.5% yield).

### DMT-on ON-A, X

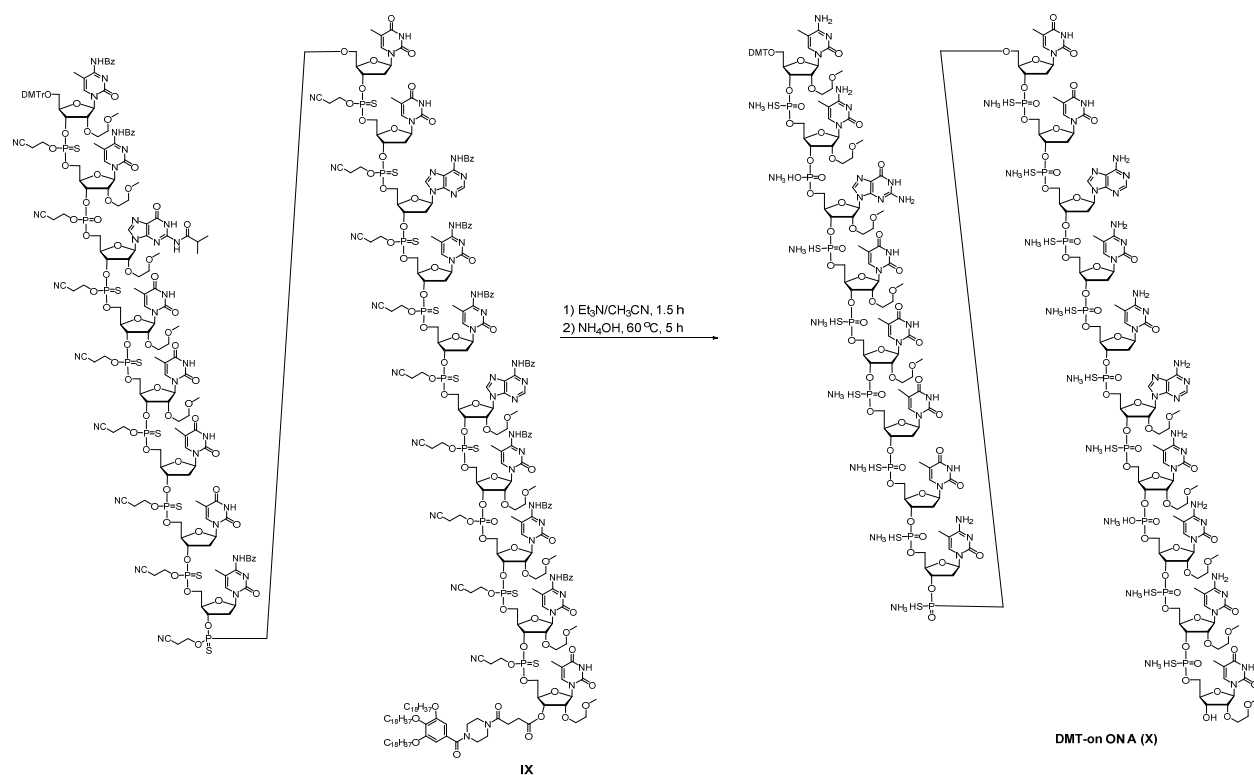

A mixture of **IX** (30 g) and EDTA (150 mg) in ACN/TEA (300 mL, 1:1 v/v) was stirred at 20-25 °C for 90 min, and the reaction mixture was concentrated in vacuo. A 30% NH<sub>4</sub>OH water solution (300 mL) was added and the reaction mixture was stirred until all solids dissolved at 25 °C (20-30 min). The homogenous solution was transferred to a 1.0 L pressure flask and was stirred at 60 °C for 5 h. The crude product solution was cooled down to room temperature and kept at -20 °C before purification.

## Fragments I-VI and VI Synthesis Data and Critical Impurities

| Fragments        | I     | II    |       | III   | IV <sup>1</sup> | VI    |       |
|------------------|-------|-------|-------|-------|-----------------|-------|-------|
| Scale (kg/batch) | 0.3   | 0.3   | 3     | 0.3   | 0.2             | 0.3   | 3     |
| Yield (%)        | 72    | 59    | 76    | 73    | 77              | 68    | 62    |
| Purity (%)       | 93.4  | 90.2  | 93.0  | 87.6  | 90.8            | 86.6  | 87.7  |
| PO (%)           | <0.10 | 0.7   | 0.11  | 0.59  | 0.87            | <0.10 | 0.15  |
| n-1 (%)          | <0.10 | 0.16  | 0.44  | 1.1   | 0.15            | 0.29  | 0.27  |
| n+1 (%)          | 0.14  | <0.10 | <0.10 | <0.10 | <0.10           | <0.10 | 0.19  |
| Deamination (%)  | <0.10 | <0.10 | <0.10 | 0.10  | NT <sup>2</sup> | 0.25  | <0.10 |

<sup>1</sup> Fragment IV was analyzed after ammonolysis

<sup>2</sup> NT: not tested

## 7. Purification of DMTr-on (X) and DMTr-off 18-mer (ON-A)

The DMTr-on **X** and DMTr-off 18-mer purification process consisted of depth filtration, orthogonal chromatography steps (hydrophobic interaction chromatography and anion exchange chromatography) and a low pH detritylation step. An ultra-filtration/dia-filtration step was also employed for final buffer exchange and concentration.

Depth filtration occurred post ammonolysis and required the dilution of the crude. This step removes the insoluble materials in the crude product **X**. The HIC chromatography step was run in a bind and elute mode, where the DMTr-on 18-mer **X** was salted out to bind to the hydrophobic resin (buffer of ammonium sulfate at about 1000mM). Reducing the ammonium sulfate to about 800mM provided an optimal buffer for the wash step. Elution of the product was carried out by further reducing the ammonium sulfate to 50mM. The elute containing **X** was subjected detritylation reaction to remove the 5'-DMTr group from **X**. This step was performed at 10 °C  $\pm$  1 °C by adjusting the pH of HIC eluate to a pH of  $2.7 \pm 0.2$  using 25% citric acid. Once the DMTr removal was complete and filtered, the pH was adjusted to 8.5 in preparation for the AEX step.

The AEX chromatography step was the second purification step. The material from the detritylation reaction was diluted with water prior to loading onto the AEX column. A wash step of 300mM sodium chloride was used to increase the purity of the 18-mer **ON-A**. Elution was carried out by further increasing the sodium chloride to 525mM. The materials and conditions for these steps are provided below.

Depth Filtration:

*Materials:*

DMTr-on 18-mer **X** crude (post ammonolysis, no adjustments)

Dilution buffer: 1111mM ammonium sulfate

Equilibration buffer: 1000mM ammonium sulfate, 50mM tris, pH 8.5

Depth filter

*Method:*

Crude preparation- Dilute the crude 10-fold into 1111mM ammonium sulfate (final ammonium sulfate will be 1000mM)  
Wet and flush the filter according to manufacturer's guidelines.  
Equilibrate the depth filter with 3 bed volumes (BVs) of equilibration buffer.  
Run the diluted crude through the filter.

**Hydrophobic Interaction Chromatography:**

*Materials:*

Column: HIC resin packed into a 14cm ID column  
Equilibration buffer: 1000mM ammonium sulfate, 50mM tris, pH 8.5  
Wash buffer: 800mM ammonium sulfate, 50mM tris, pH 8.5  
Elution buffer: 50mM ammonium sulfate, 50mM tris, pH 8.5  
Strip: deionized water  
Cleaning in place: 1N sodium hydroxide  
Storage: 0.1N sodium hydroxide

UV monitor: 295nm

*Method:*

Equilibrate the column with 4 column volumes (CVs) of 1000mM ammonium sulfate, 50mM tris, pH 8.5 at 200 cm/h.  
Load the sample at 200 cm/h.  
Chase the column with 4 CVs of 1000mM ammonium sulfate, 50mM tris, pH 8.5 at 200 cm/h.  
Wash the column with 800mM ammonium sulfate, 50mM tris, pH 8.5 at 100cm/hr until UV gate (2mm flowcell) hits 0.5 AU.  
Continue column wash with 800mM ammonium sulfate, 50mM tris, pH 8.5 for 2 CVs at 100 cm/h.  
Elute the column with 8 CVs of 50mM ammonium sulfate, 50mM tris, pH 8.5 at 200 cm/h.  
Strip the column with 4 CVs of deionized water at 200 cm/h.  
Clean the column with 3 CVs of 1N sodium hydroxide at 200 cm/h.  
Store the column with 3 CVs of 0.1N sodium hydroxide at 200 cm/h.

**Detritylation:**

*Materials:*

Acidification buffer: 25% (w/w) citric acid  
Neutralization buffer: 5N sodium hydroxide

*Method:*

Equilibrate the material pool to 10°C.

Add 25% (w/w) citric acid until the pH is 2.7.

The reaction will take about 4-5 hours.

Once reaction is completed, neutralize the pool with 5N sodium hydroxide to pH 8.5

Filter the pool through a pre-filter and 0.22um sterilizing filter.

**Anion Exchange Chromatography:**

*Materials:*

Column: AEX resin packed into a 14cm ID column

Dilution buffer: dH<sub>2</sub>O

Charge/ Strip: 2000mM sodium chloride, 250mM tris, pH 8.5

Equilibration buffer: 100mM sodium chloride, 50mM tris, pH 8.5

Wash buffer: 300mM sodium chloride, 50mM tris, pH 8.5

Elution buffer: 525mM sodium chloride, 50mM tris, pH 8.5

Cleaning in place: 1N sodium hydroxide

Storage: 0.1N sodium hydroxide

UV monitor: 295nm

*Method:* -Sample Preparation-Dilute sample into water until conductivity is ~20mS/cm.

*Process Method:*

Charge the column with 2 CVs of 2000mM sodium chloride, 250mM tris, pH 8.5 at 200 cm/h.

Equilibrate the column with 4 CVs of 100mM sodium chloride, 50mM tris, pH 8.5 at 200 cm/h.

Load the sample at 200 cm/h.

Chase the column with 2 CVs of 100mM sodium chloride, 50mM tris, pH 8.5 at 200 cm/h.

Wash the column with 300mM sodium chloride, 50mM tris, pH 8.5 at 200cm/hr until UV gate (2mm flowcell) hits 0.4 AU at 200 cm/h.

Continue column wash with 300mM sodium chloride, 50mM tris, pH 8.5 for 4 CVs at 200 cm/h.

Elute the column with 7 CVs of 525mM sodium chloride, 50mM tris, pH 8.5 at 200 cm/h.

Strip the column with 3 CVs of 2000mM sodium chloride, 250mM tris, pH 8.5 at 200 cm/h.

Clean the column with 3 CVs of 1N sodium hydroxide at 200 cm/h.

Store the column with 3 CVs of 0.1N sodium hydroxide.

## 8. Analytical data and spectrums

### Compound I LC-MS Conditions, Chromatogram, HRMS, <sup>1</sup>H-NMR, <sup>13</sup>C-NMR, <sup>31</sup>P-NMR spectra

#### LC-MS Conditions

| Column           | Acquity UPLC BEH C18 (130 Å, 2.1mm*150mm, 1.7 μm)                                                                                                                                                                                                                                                          |            |    |     |    |     |    |    |    |    |    |    |    |    |    |
|------------------|------------------------------------------------------------------------------------------------------------------------------------------------------------------------------------------------------------------------------------------------------------------------------------------------------------|------------|----|-----|----|-----|----|----|----|----|----|----|----|----|----|
| Oven             | 60°C                                                                                                                                                                                                                                                                                                       |            |    |     |    |     |    |    |    |    |    |    |    |    |    |
| Mobile phase     | A: 20 mM NH <sub>4</sub> OAc in H <sub>2</sub> O, 25% ; B: ACN                                                                                                                                                                                                                                             |            |    |     |    |     |    |    |    |    |    |    |    |    |    |
| Gradient program | <table border="1"> <thead> <tr> <th>Time (min)</th> <th>A%</th> </tr> </thead> <tbody> <tr><td>0.0</td><td>60</td></tr> <tr><td>1.0</td><td>60</td></tr> <tr><td>28</td><td>52</td></tr> <tr><td>30</td><td>20</td></tr> <tr><td>31</td><td>60</td></tr> <tr><td>36</td><td>60</td></tr> </tbody> </table> | Time (min) | A% | 0.0 | 60 | 1.0 | 60 | 28 | 52 | 30 | 20 | 31 | 60 | 36 | 60 |
| Time (min)       | A%                                                                                                                                                                                                                                                                                                         |            |    |     |    |     |    |    |    |    |    |    |    |    |    |
| 0.0              | 60                                                                                                                                                                                                                                                                                                         |            |    |     |    |     |    |    |    |    |    |    |    |    |    |
| 1.0              | 60                                                                                                                                                                                                                                                                                                         |            |    |     |    |     |    |    |    |    |    |    |    |    |    |
| 28               | 52                                                                                                                                                                                                                                                                                                         |            |    |     |    |     |    |    |    |    |    |    |    |    |    |
| 30               | 20                                                                                                                                                                                                                                                                                                         |            |    |     |    |     |    |    |    |    |    |    |    |    |    |
| 31               | 60                                                                                                                                                                                                                                                                                                         |            |    |     |    |     |    |    |    |    |    |    |    |    |    |
| 36               | 60                                                                                                                                                                                                                                                                                                         |            |    |     |    |     |    |    |    |    |    |    |    |    |    |
| Flow rate        | 0.5 mL/min                                                                                                                                                                                                                                                                                                 |            |    |     |    |     |    |    |    |    |    |    |    |    |    |
| Detector         | UV 260 nm                                                                                                                                                                                                                                                                                                  |            |    |     |    |     |    |    |    |    |    |    |    |    |    |
| Injection volume | 2 μL (10mg/mL)                                                                                                                                                                                                                                                                                             |            |    |     |    |     |    |    |    |    |    |    |    |    |    |
| Diluent          | ACN:H <sub>2</sub> O=8:2                                                                                                                                                                                                                                                                                   |            |    |     |    |     |    |    |    |    |    |    |    |    |    |

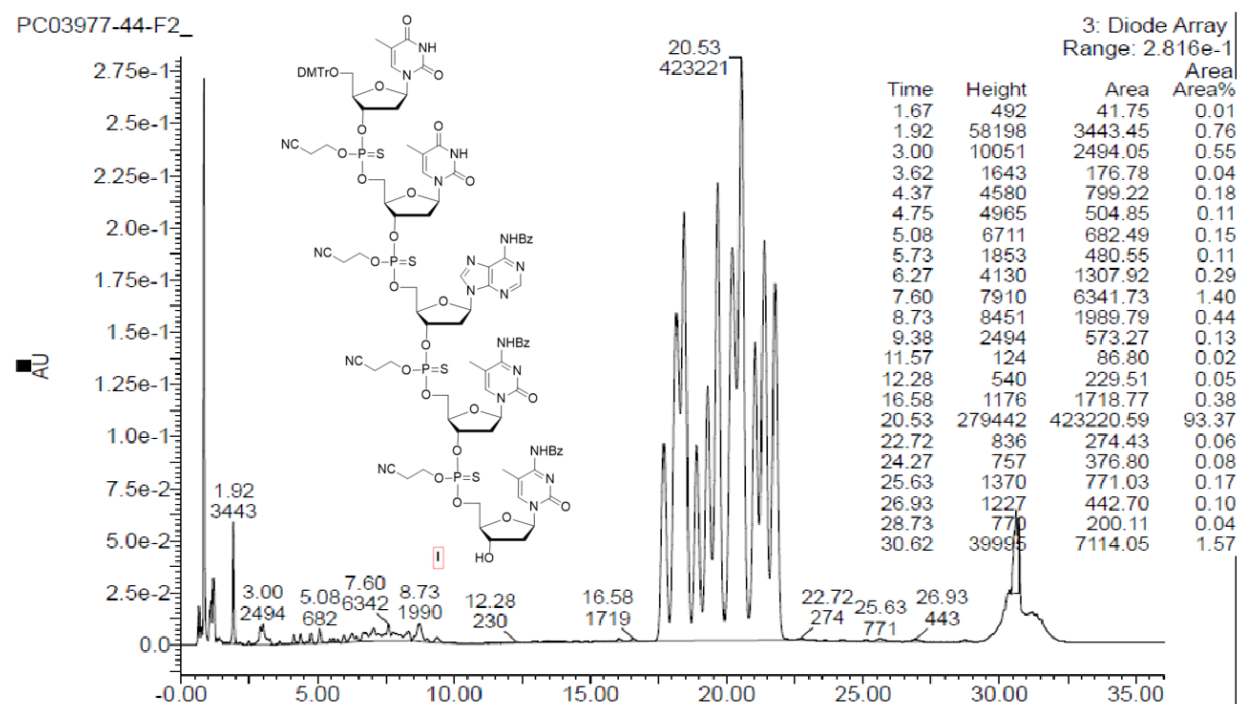

Figure 1. LC chromatogram of **I**

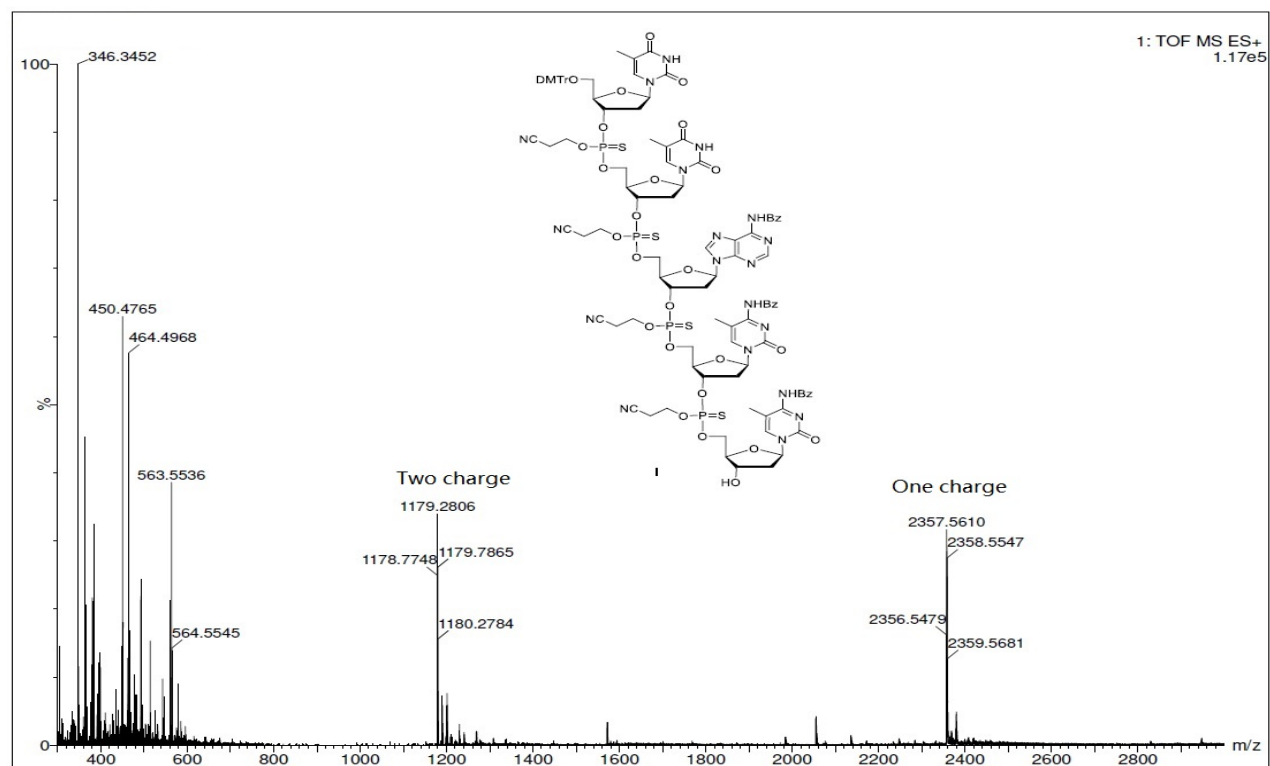

Figure 2. HRMS spectrum of **I**





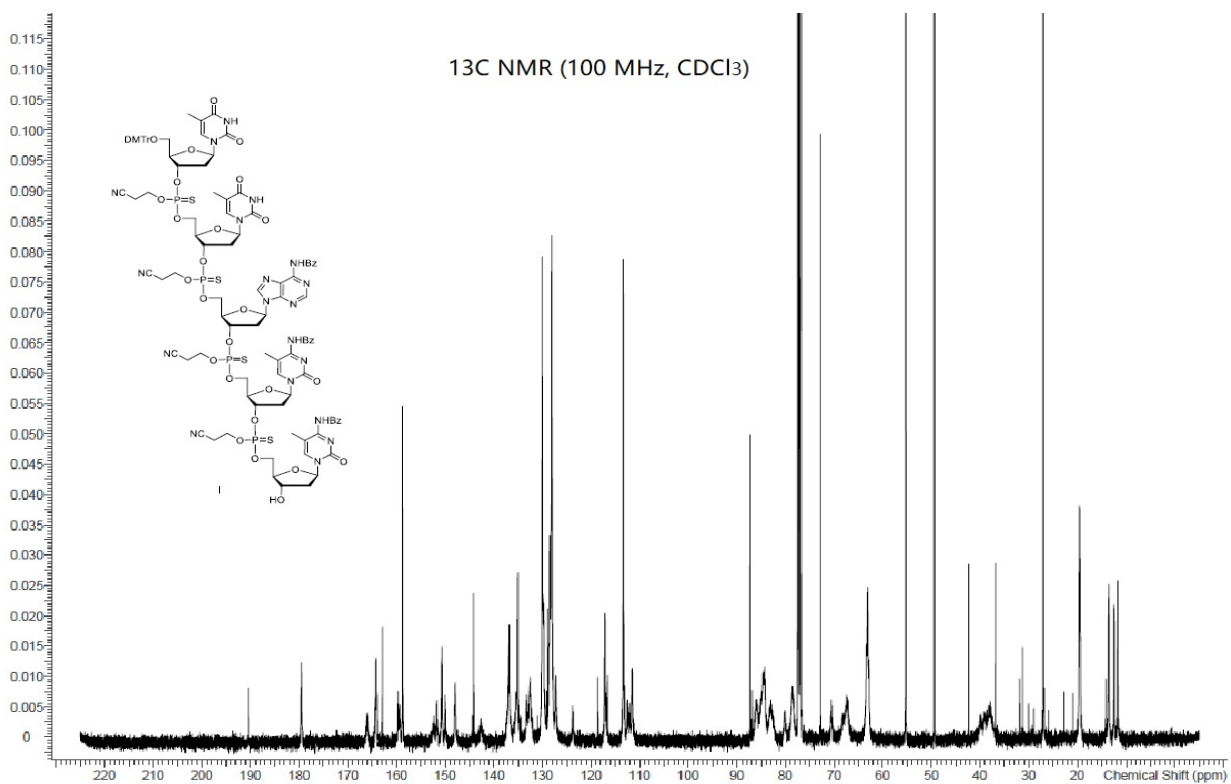

Figure 4. <sup>13</sup>C NMR spectrum of **I**

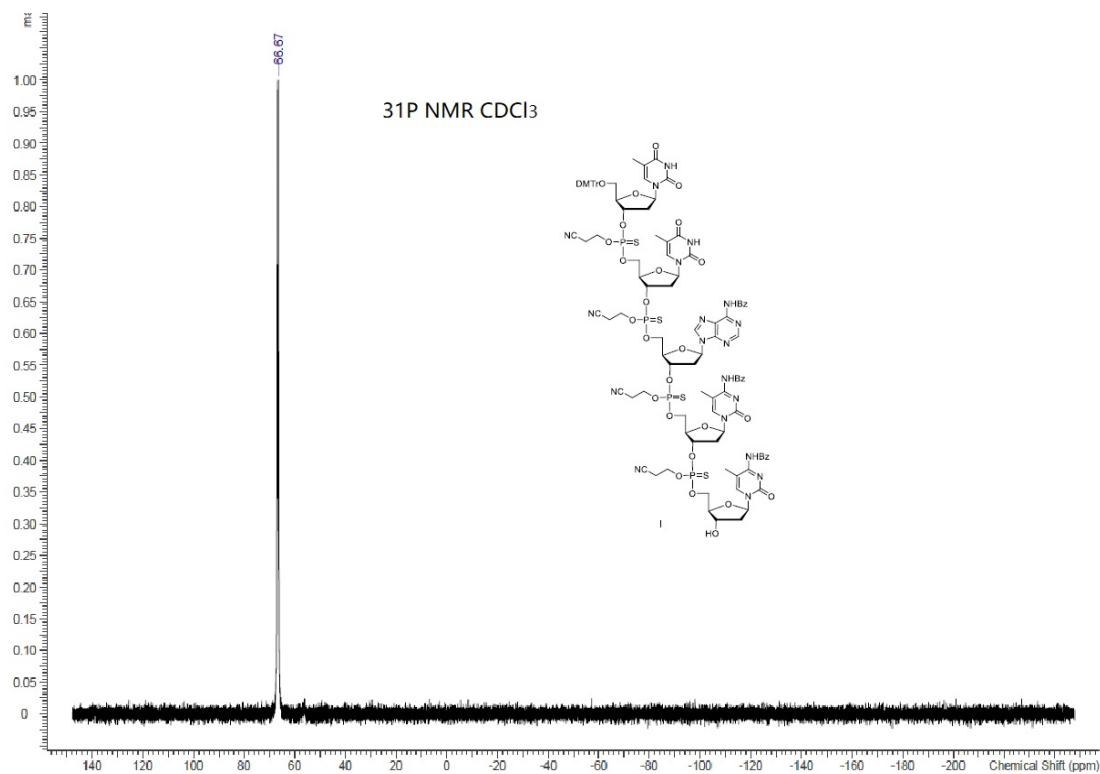

Figure 5. <sup>31</sup>P NMR spectrum of I

## Compound II LC-MS Conditions, Chromatogram, HRMS, <sup>1</sup>H-NMR, <sup>13</sup>C-NMR, <sup>31</sup>P-NMR spectra

### LC-MS Conditions

| Column           | Acquity UPLC BEH C18 (130 Å, 2.1mm*150mm, 1.7 μm)                                                                                                                                                                                                                                                                                          |            |    |     |    |     |    |    |    |    |    |    |    |    |    |    |    |
|------------------|--------------------------------------------------------------------------------------------------------------------------------------------------------------------------------------------------------------------------------------------------------------------------------------------------------------------------------------------|------------|----|-----|----|-----|----|----|----|----|----|----|----|----|----|----|----|
| Oven             | 60°C                                                                                                                                                                                                                                                                                                                                       |            |    |     |    |     |    |    |    |    |    |    |    |    |    |    |    |
| Mobile phase     | A: 20 mM NH <sub>4</sub> OAc in H <sub>2</sub> O, 25% ; B: ACN                                                                                                                                                                                                                                                                             |            |    |     |    |     |    |    |    |    |    |    |    |    |    |    |    |
| Gradient program | <table border="1"> <thead> <tr> <th>Time (min)</th> <th>A%</th> </tr> </thead> <tbody> <tr><td>0.0</td><td>70</td></tr> <tr><td>1.0</td><td>70</td></tr> <tr><td>28</td><td>60</td></tr> <tr><td>29</td><td>10</td></tr> <tr><td>30</td><td>10</td></tr> <tr><td>31</td><td>70</td></tr> <tr><td>36</td><td>70</td></tr> </tbody> </table> | Time (min) | A% | 0.0 | 70 | 1.0 | 70 | 28 | 60 | 29 | 10 | 30 | 10 | 31 | 70 | 36 | 70 |
| Time (min)       | A%                                                                                                                                                                                                                                                                                                                                         |            |    |     |    |     |    |    |    |    |    |    |    |    |    |    |    |
| 0.0              | 70                                                                                                                                                                                                                                                                                                                                         |            |    |     |    |     |    |    |    |    |    |    |    |    |    |    |    |
| 1.0              | 70                                                                                                                                                                                                                                                                                                                                         |            |    |     |    |     |    |    |    |    |    |    |    |    |    |    |    |
| 28               | 60                                                                                                                                                                                                                                                                                                                                         |            |    |     |    |     |    |    |    |    |    |    |    |    |    |    |    |
| 29               | 10                                                                                                                                                                                                                                                                                                                                         |            |    |     |    |     |    |    |    |    |    |    |    |    |    |    |    |
| 30               | 10                                                                                                                                                                                                                                                                                                                                         |            |    |     |    |     |    |    |    |    |    |    |    |    |    |    |    |
| 31               | 70                                                                                                                                                                                                                                                                                                                                         |            |    |     |    |     |    |    |    |    |    |    |    |    |    |    |    |
| 36               | 70                                                                                                                                                                                                                                                                                                                                         |            |    |     |    |     |    |    |    |    |    |    |    |    |    |    |    |
| Flow rate        | 0.5 mL/min                                                                                                                                                                                                                                                                                                                                 |            |    |     |    |     |    |    |    |    |    |    |    |    |    |    |    |
| Detector         | UV 260 nm                                                                                                                                                                                                                                                                                                                                  |            |    |     |    |     |    |    |    |    |    |    |    |    |    |    |    |
| Injection volume | 2 μL (8mg/mL)                                                                                                                                                                                                                                                                                                                              |            |    |     |    |     |    |    |    |    |    |    |    |    |    |    |    |
| Diluent          | ACN:H <sub>2</sub> O=8:2                                                                                                                                                                                                                                                                                                                   |            |    |     |    |     |    |    |    |    |    |    |    |    |    |    |    |

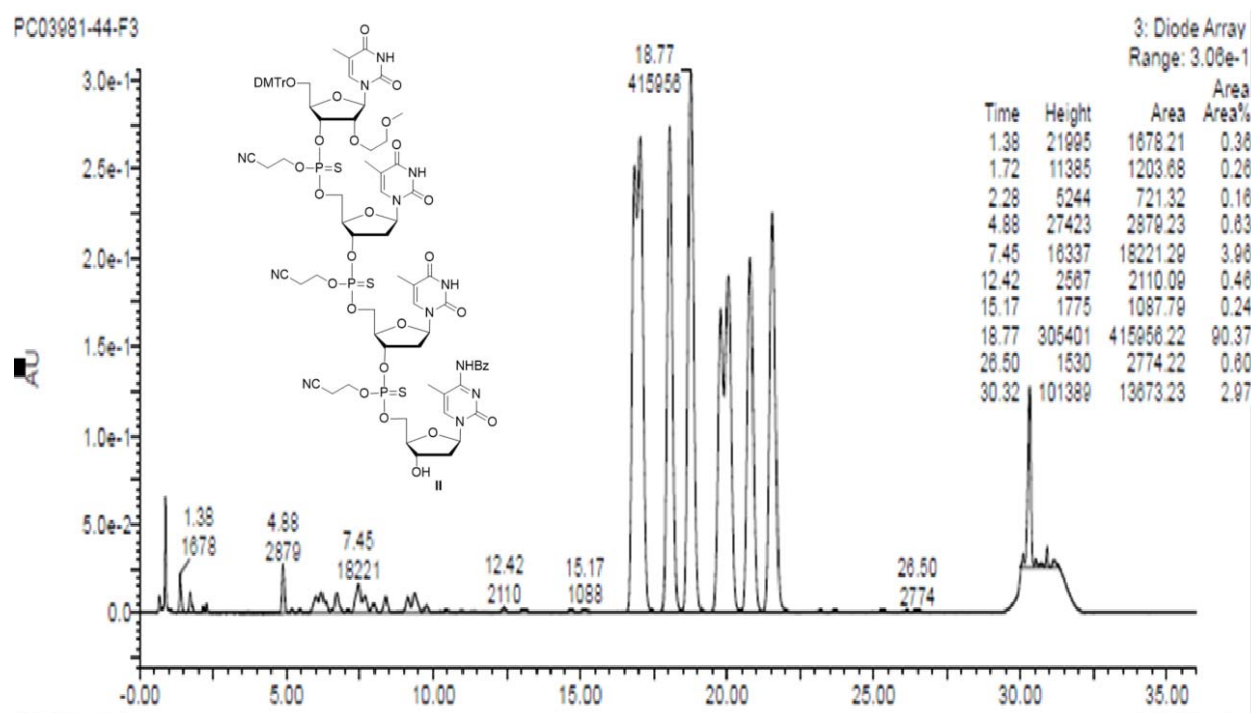

Figure 6. LC chromatogram of II



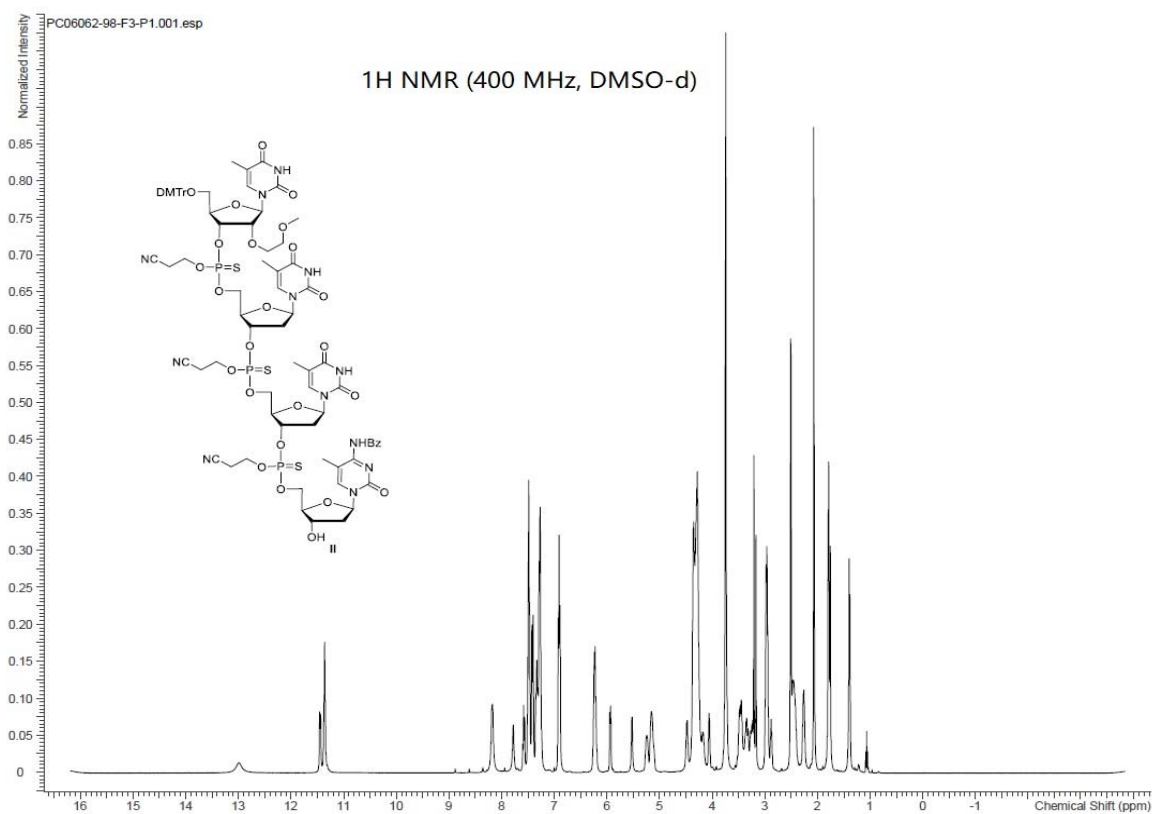

Figure 8. <sup>1</sup>H NMR spectrum of II

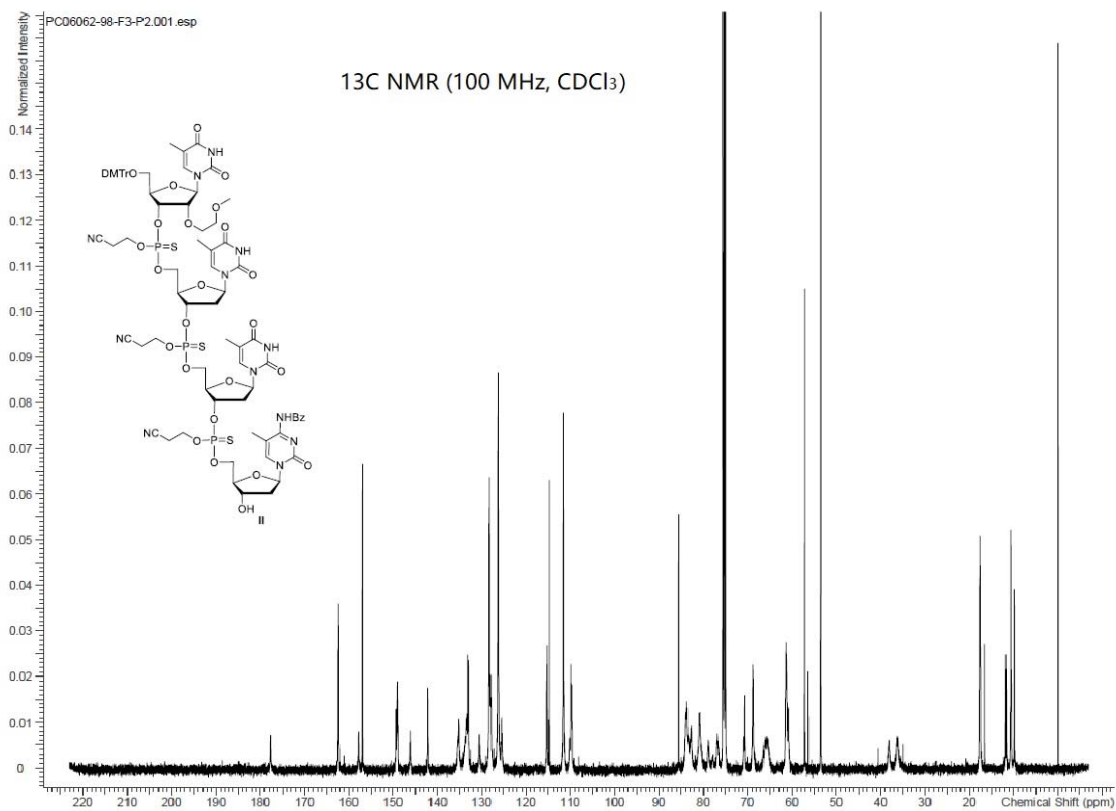

Figure 9. 13C NMR spectrum of II

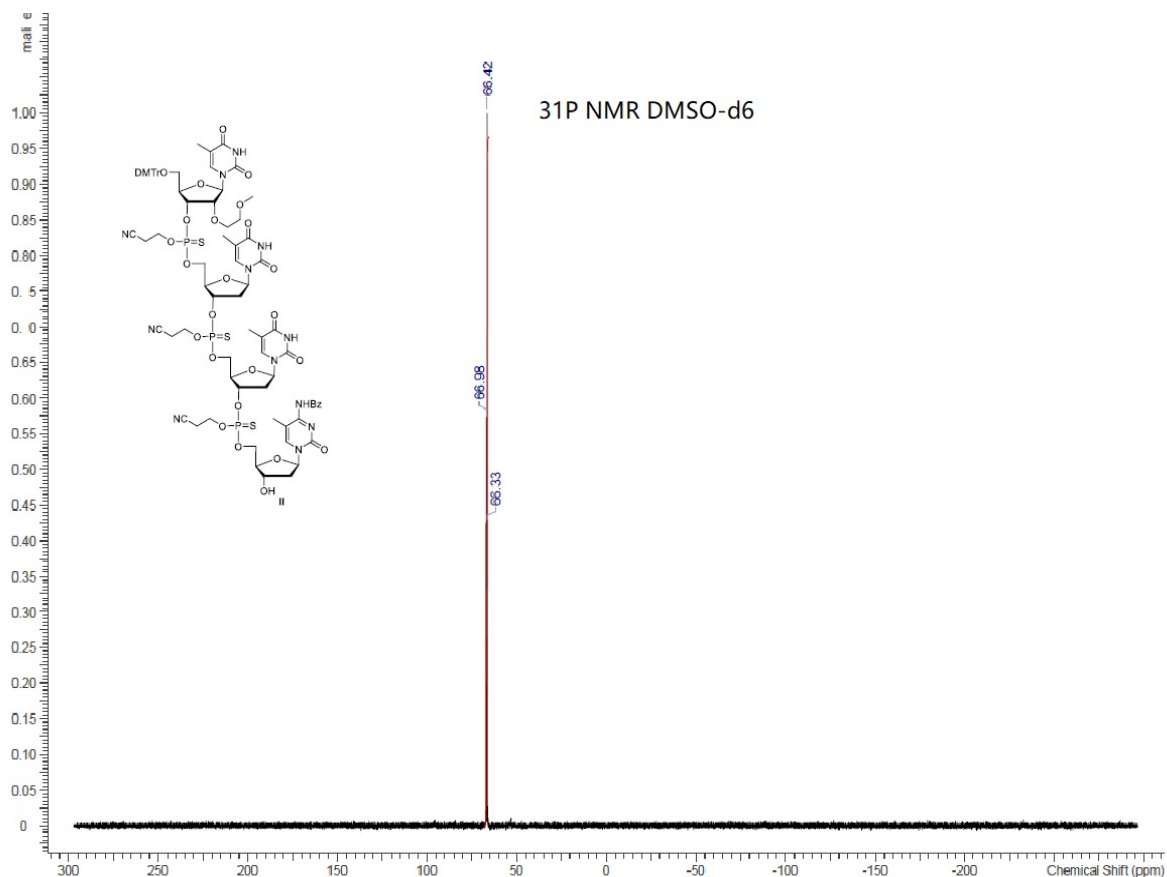

Figure 10. <sup>31</sup>P NMR of II

## Compound III LC-MS Conditions, Chromatogram, HRMS, <sup>1</sup>H-NMR, <sup>13</sup>C-NMR, <sup>31</sup>P-NMR spectra

### LC-MS Conditions

| Column           | Acquity UPLC BEH C18 (130 Å, 2.1mm*150mm, 1.7 um)                                                                                                                                                                                                                                                                                                               |            |    |     |    |     |    |    |    |    |    |    |    |    |    |    |    |
|------------------|-----------------------------------------------------------------------------------------------------------------------------------------------------------------------------------------------------------------------------------------------------------------------------------------------------------------------------------------------------------------|------------|----|-----|----|-----|----|----|----|----|----|----|----|----|----|----|----|
| Oven             | 60°C                                                                                                                                                                                                                                                                                                                                                            |            |    |     |    |     |    |    |    |    |    |    |    |    |    |    |    |
| Mobile phase     | A: 20 mM NH <sub>4</sub> OAc in H <sub>2</sub> O, 25% ; B: ACN                                                                                                                                                                                                                                                                                                  |            |    |     |    |     |    |    |    |    |    |    |    |    |    |    |    |
| Gradient program | <table border="1"> <thead> <tr> <th>Time (min)</th> <th>A%</th> </tr> </thead> <tbody> <tr> <td>0.0</td> <td>60</td> </tr> <tr> <td>1.0</td> <td>60</td> </tr> <tr> <td>28</td> <td>35</td> </tr> <tr> <td>29</td> <td>10</td> </tr> <tr> <td>30</td> <td>10</td> </tr> <tr> <td>31</td> <td>60</td> </tr> <tr> <td>36</td> <td>60</td> </tr> </tbody> </table> | Time (min) | A% | 0.0 | 60 | 1.0 | 60 | 28 | 35 | 29 | 10 | 30 | 10 | 31 | 60 | 36 | 60 |
| Time (min)       | A%                                                                                                                                                                                                                                                                                                                                                              |            |    |     |    |     |    |    |    |    |    |    |    |    |    |    |    |
| 0.0              | 60                                                                                                                                                                                                                                                                                                                                                              |            |    |     |    |     |    |    |    |    |    |    |    |    |    |    |    |
| 1.0              | 60                                                                                                                                                                                                                                                                                                                                                              |            |    |     |    |     |    |    |    |    |    |    |    |    |    |    |    |
| 28               | 35                                                                                                                                                                                                                                                                                                                                                              |            |    |     |    |     |    |    |    |    |    |    |    |    |    |    |    |
| 29               | 10                                                                                                                                                                                                                                                                                                                                                              |            |    |     |    |     |    |    |    |    |    |    |    |    |    |    |    |
| 30               | 10                                                                                                                                                                                                                                                                                                                                                              |            |    |     |    |     |    |    |    |    |    |    |    |    |    |    |    |
| 31               | 60                                                                                                                                                                                                                                                                                                                                                              |            |    |     |    |     |    |    |    |    |    |    |    |    |    |    |    |
| 36               | 60                                                                                                                                                                                                                                                                                                                                                              |            |    |     |    |     |    |    |    |    |    |    |    |    |    |    |    |
| Flow rate        | 0.5 mL/min                                                                                                                                                                                                                                                                                                                                                      |            |    |     |    |     |    |    |    |    |    |    |    |    |    |    |    |

|                  |                          |
|------------------|--------------------------|
| Detector         | UV 260 nm                |
| Injection volume | 2 $\mu$ L (5mg/mL)       |
| Diluent          | ACN:H <sub>2</sub> O=8:2 |

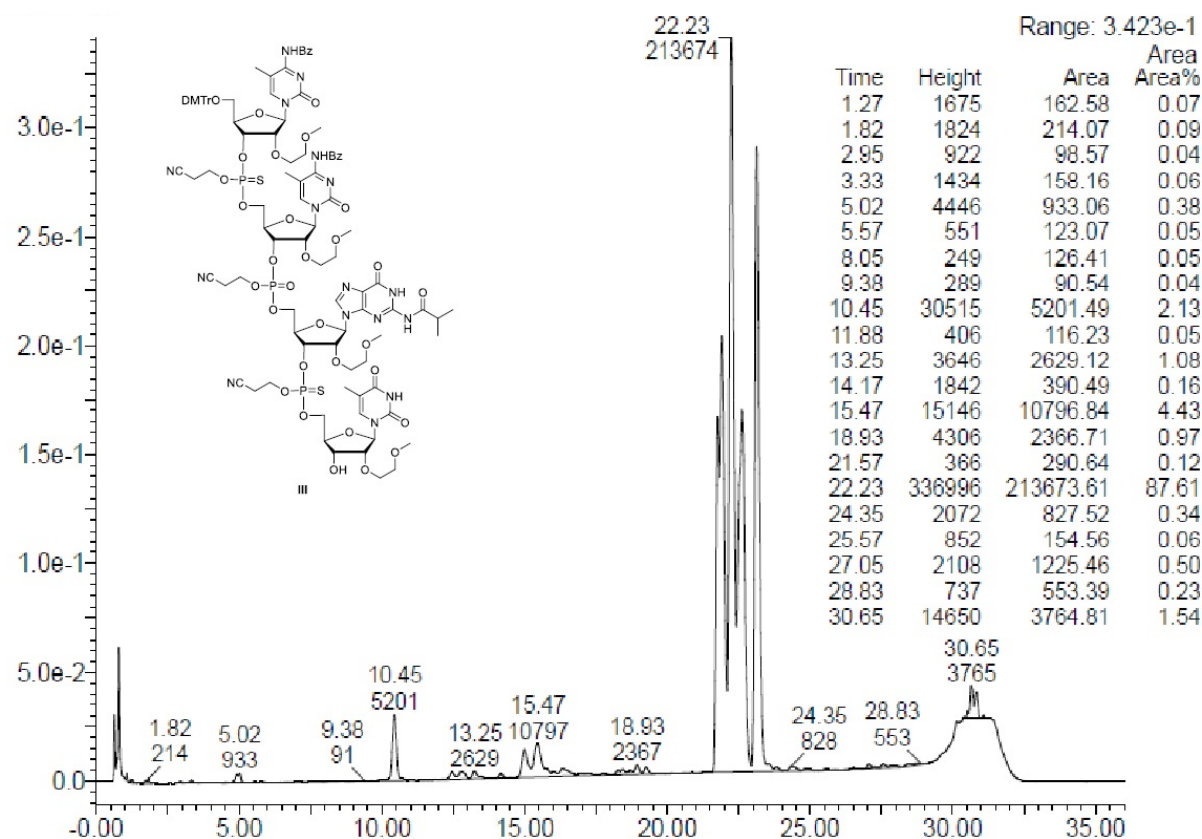

Figure 11. LC chromatogram of III



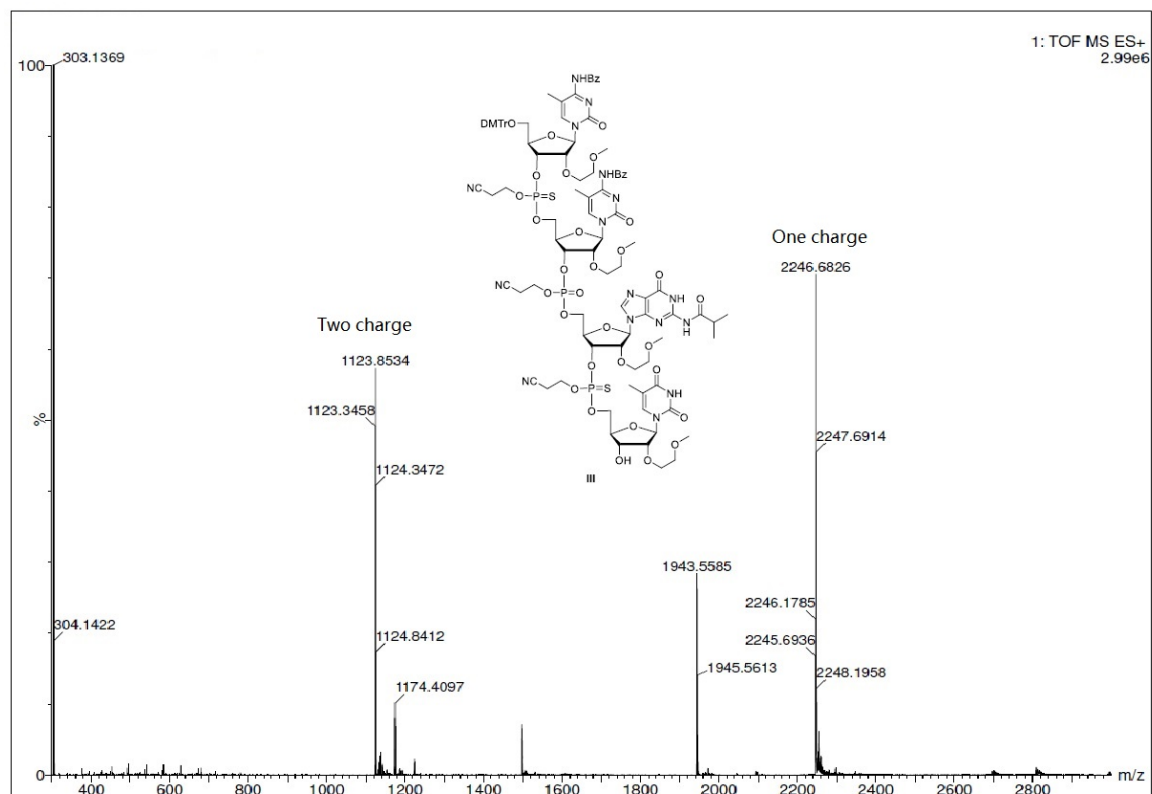

Figure 12. HRMS spectrum of **III**

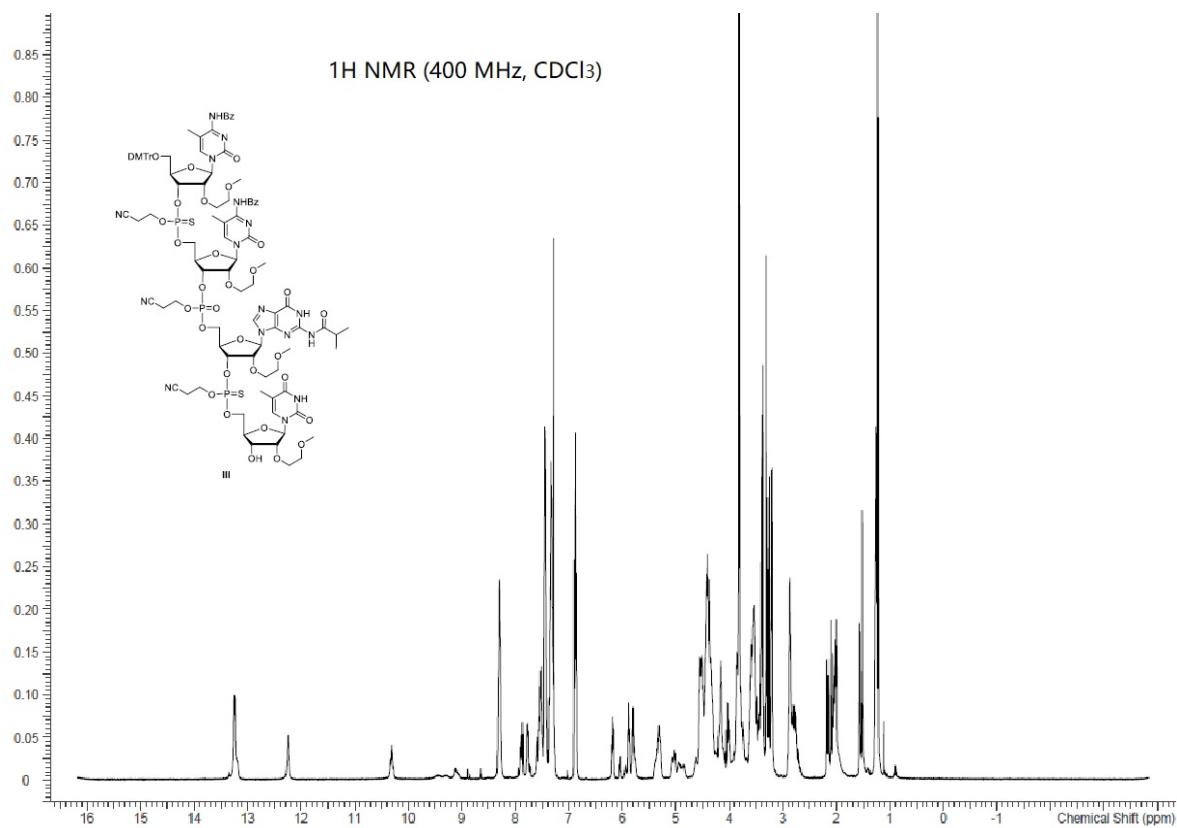

Figure 13. <sup>1</sup>H NMR spectrum of **III**

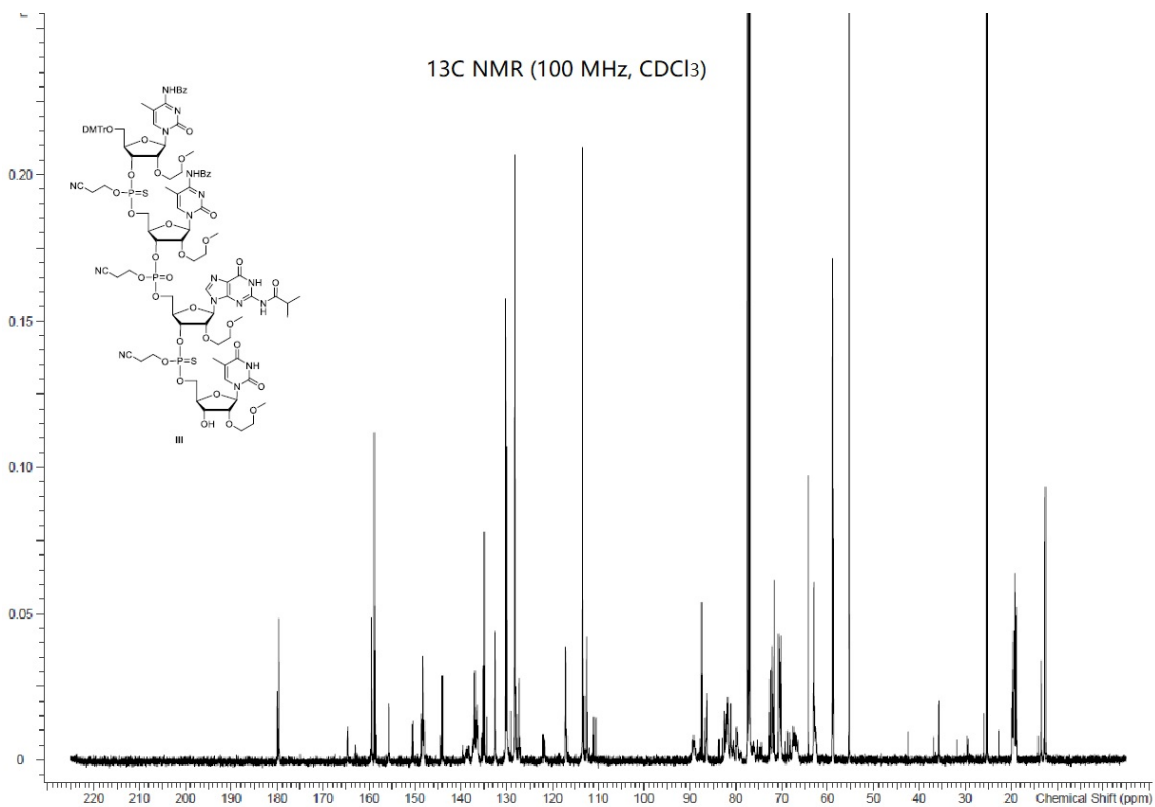

Figure 14. <sup>13</sup>C NMR spectrum of **III**

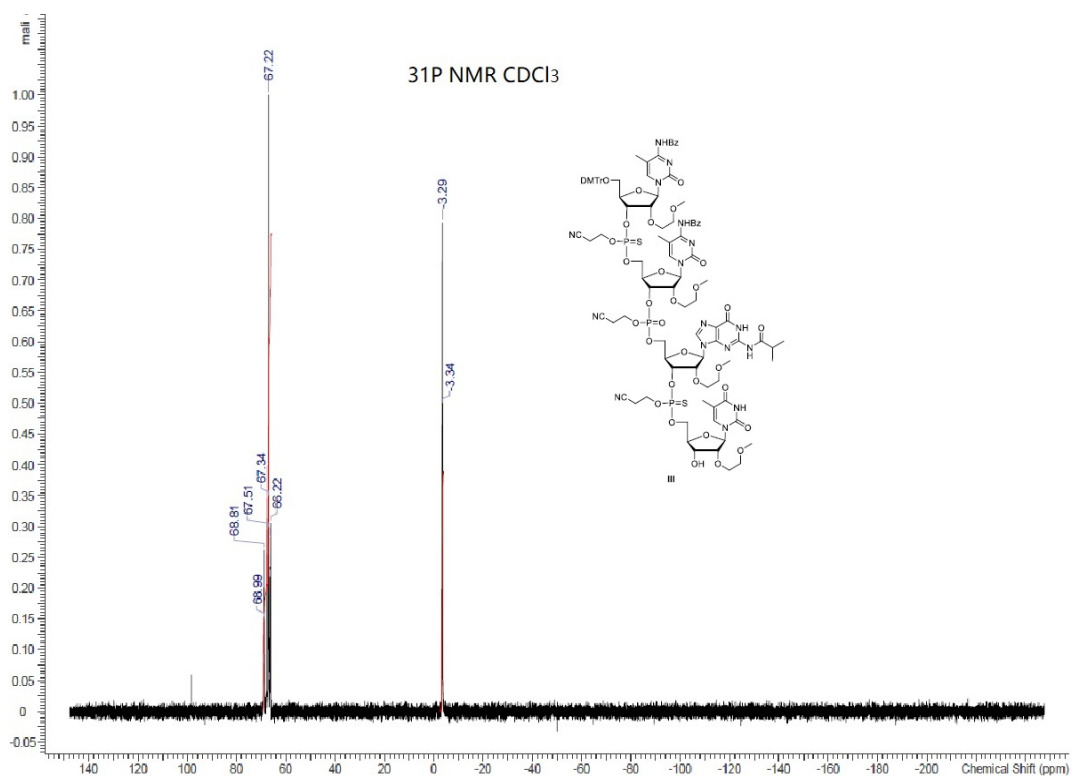

Figure 15. <sup>31</sup>P NMR spectrum of III

**Compound VI LC-MS Conditions, Chromatogram, HRMS, <sup>1</sup>H-NMR, <sup>13</sup>C-NMR, <sup>31</sup>P-NMR spectra**

|                  |                                                         |
|------------------|---------------------------------------------------------|
| Column           | Acquity UPLC BEH C18 (2.1mm*100mm*1.7 um)               |
| Oven             | 45°C                                                    |
| Mobile phase     | A: 5 mM NH <sub>4</sub> OAc in H <sub>2</sub> O; B: ACN |
| Gradient program | Time (min) A%                                           |
|                  | 0 70                                                    |
|                  | 8.0 5                                                   |
|                  | 15 5                                                    |
|                  | 16 70                                                   |
|                  | 20 70                                                   |
| Flow rate        | 0.4 mL/min                                              |
| Detector         | UV 260 nm                                               |
| Injection volume | 1 μL (2mg/mL)                                           |
| Diluent          | ACN:H <sub>2</sub> O=8:2                                |

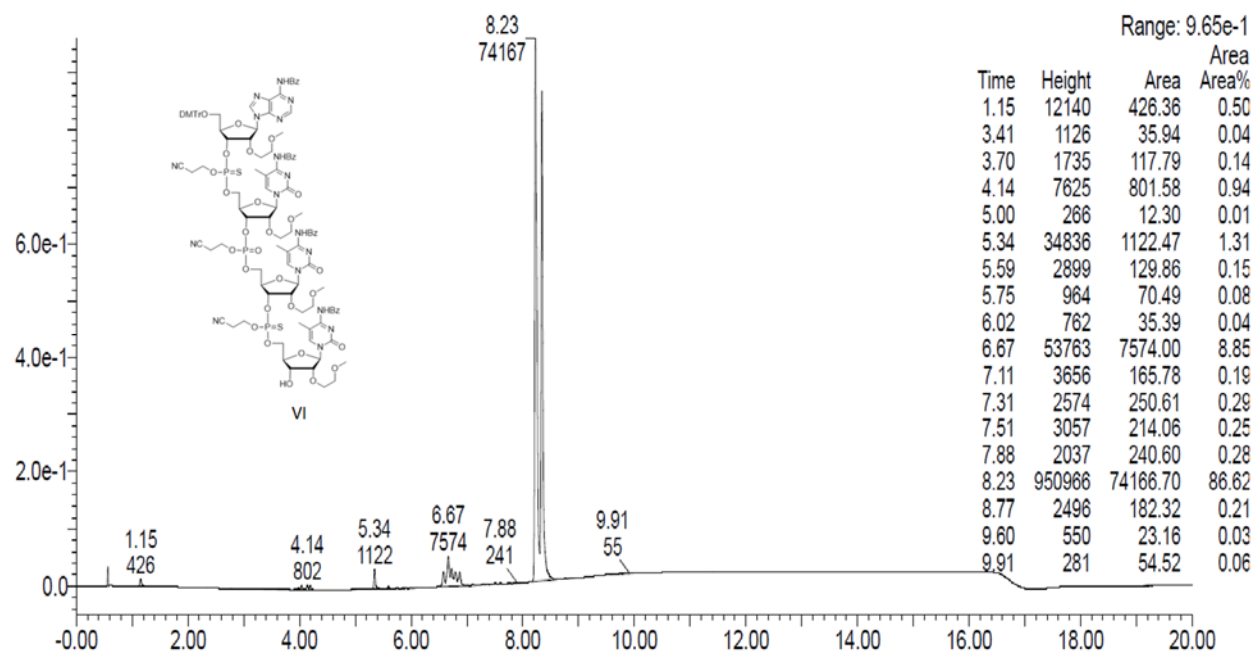

Figure 16. LC chromatogram of VI

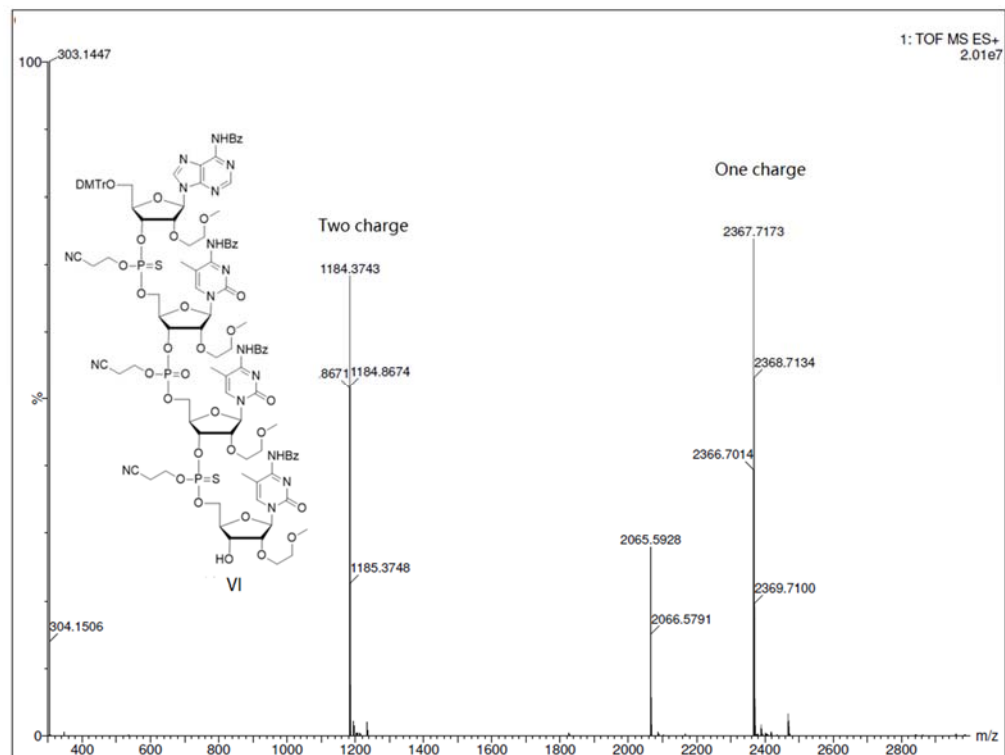

Figure 17. HRMS spectrum of VI

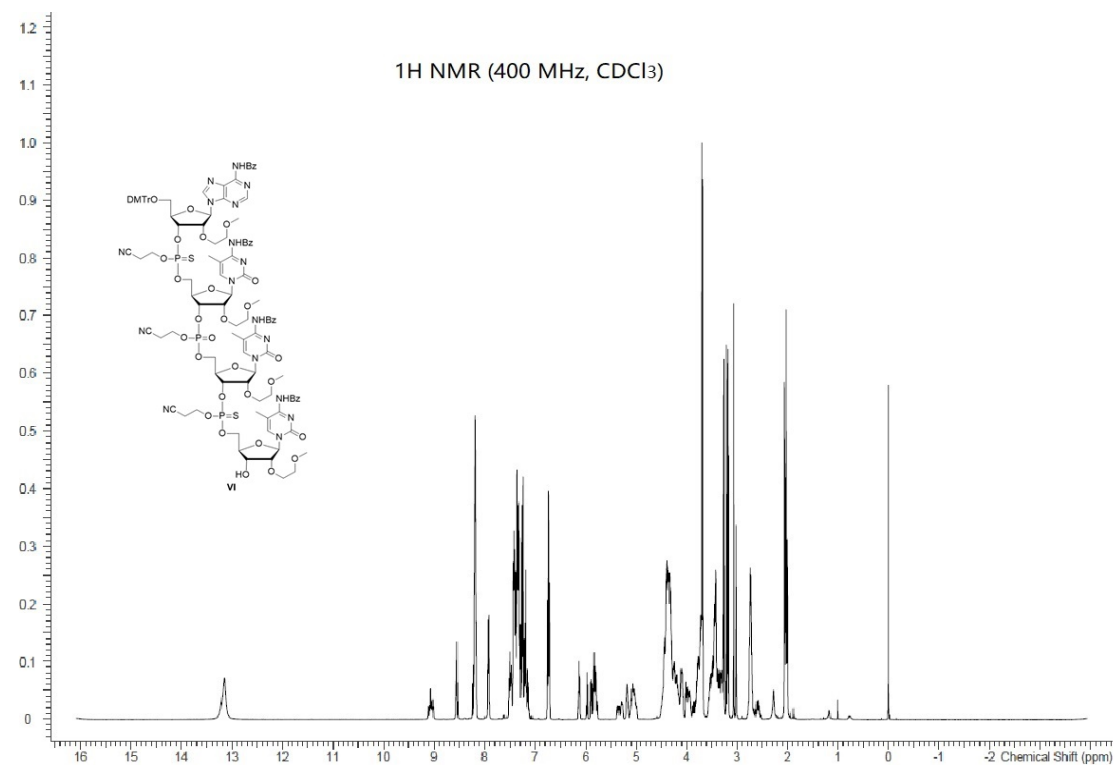

Figure 18. <sup>1</sup>H NMR spectrum of VI

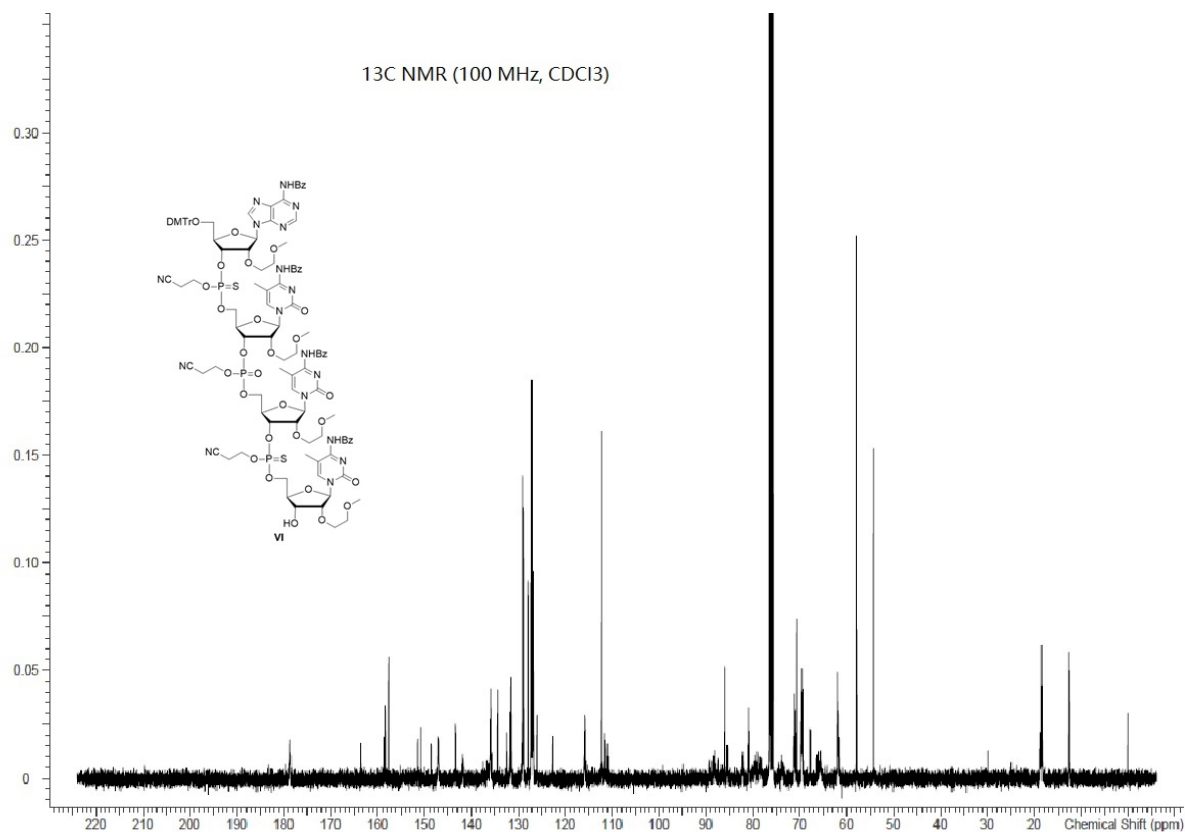

Figure 19. <sup>13</sup>C NMR spectrum of VI

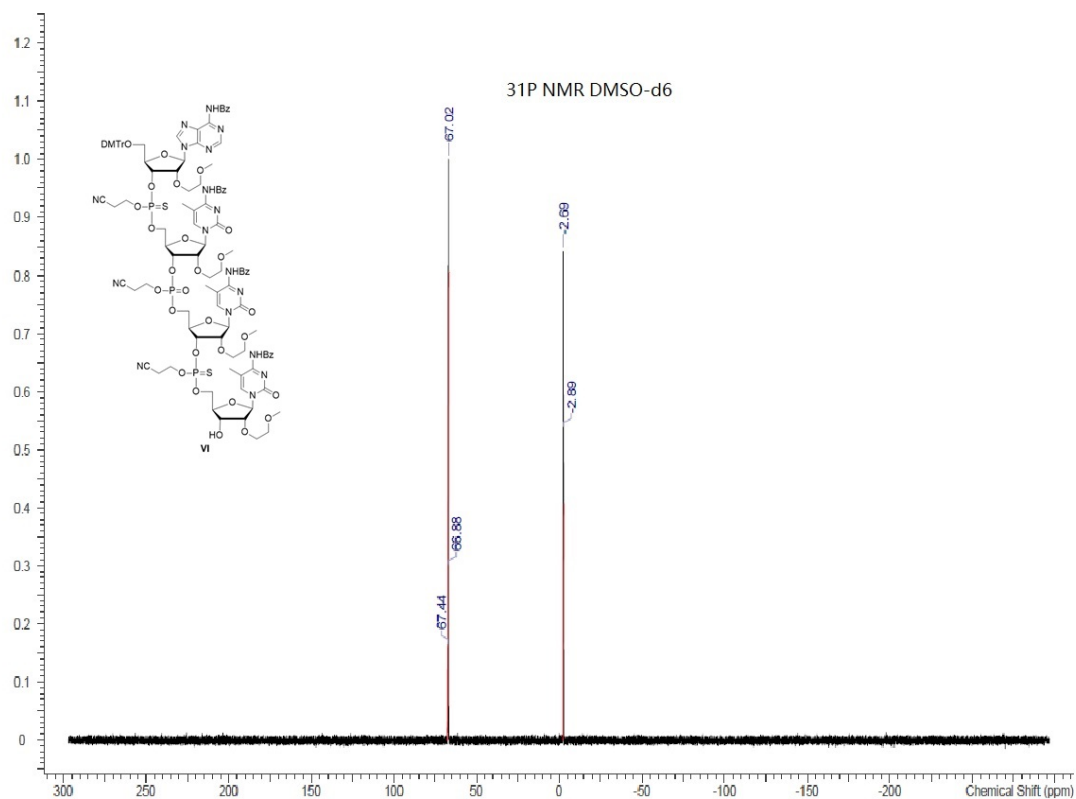

Figure 20. 31P NMR spectrum of VI

## Compound IV-H (after ammonolysis) UPLC-MS Conditions, Chromatogram, and HRMS Spectra

### LC-MS Conditions

|                  |                                            |
|------------------|--------------------------------------------|
| Column           | Acquity UPLC BEH C18 (2.1mm*150mm, 1.7 um) |
| Oven             | 45°C                                       |
| Mobile phase     | A: 1% HFIP, 0.1% HA in water; B: MeOH      |
| Gradient program | Time (min) A%                              |
|                  | 0.0 98                                     |
|                  | 1.0 98                                     |
|                  | 13 50                                      |
|                  | 16 15                                      |
|                  | 16.5 15                                    |
|                  | 17 98                                      |
|                  | 21 98                                      |
| Flow rate        | 0.3 mL/min                                 |
| Detector         | UV 260 nm                                  |
| Injection volume | 3μL (5mg/mL)                               |
| Diluent          | H <sub>2</sub> O                           |

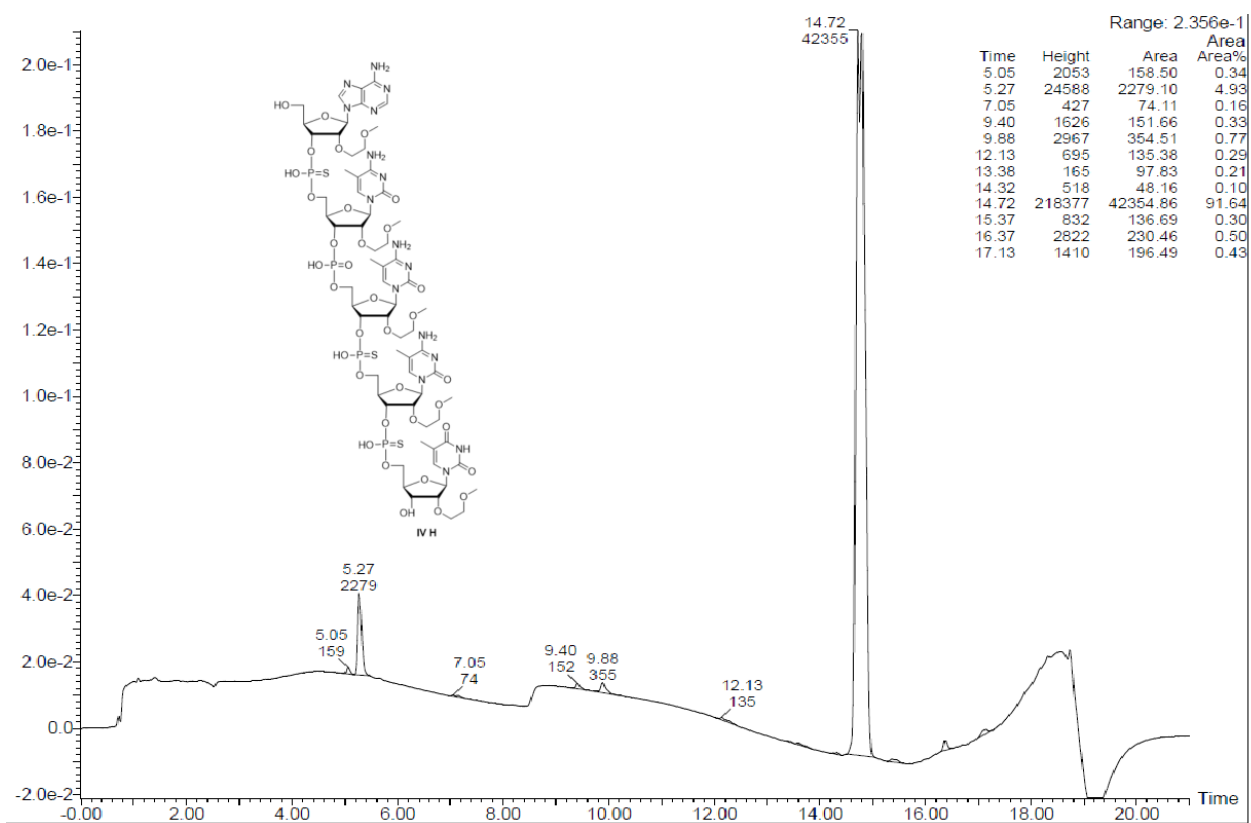

Figure 21. LC chromatogram of IV-H (after ammonolysis of IV)



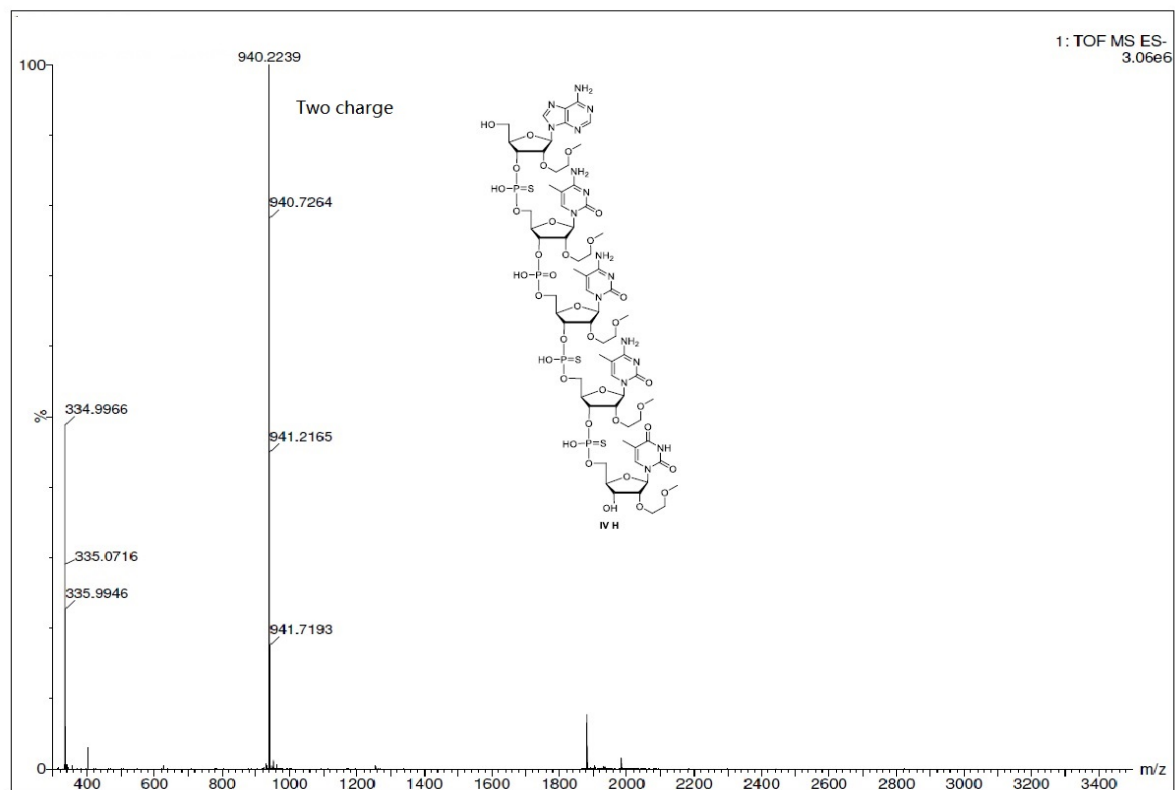

Figure 22. HRMS spectrum of **IV-H** (after ammonolysis of **IV**)

**Compound 5'-HO-10-mer-H (VII-H). UPLC Condition, Chromatogram, and HRMS Spectrum:**

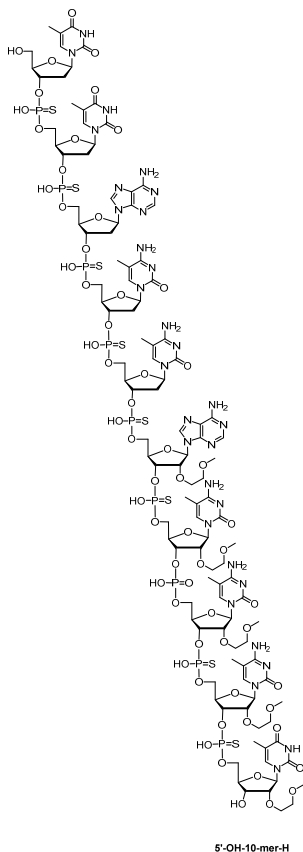

| Column           | Acquity UPLC CSH Fluoro-Phenyl column<br>(2.1mm*150mm, 1.7 um )                                                                             |
|------------------|---------------------------------------------------------------------------------------------------------------------------------------------|
| Oven             | 55°C                                                                                                                                        |
| Mobile phase     | A: 10 mM TEA + 100 mM HFIP in water<br>B: 10 mM TEA + 100 mM HFIP in MeOH                                                                   |
| Gradient program | <div>Time (min)</div> <div>A%</div> <div>0.0 90</div> <div>1.0 90</div> <div>10 50</div> <div>11 15</div> <div>12 90</div> <div>16 90</div> |
| Flow rate        | 0.2 mL/min                                                                                                                                  |
| Detector         | UV 260 nm                                                                                                                                   |
| Injection volume | 0.5 µL                                                                                                                                      |
| Diluent          | H <sub>2</sub> O                                                                                                                            |

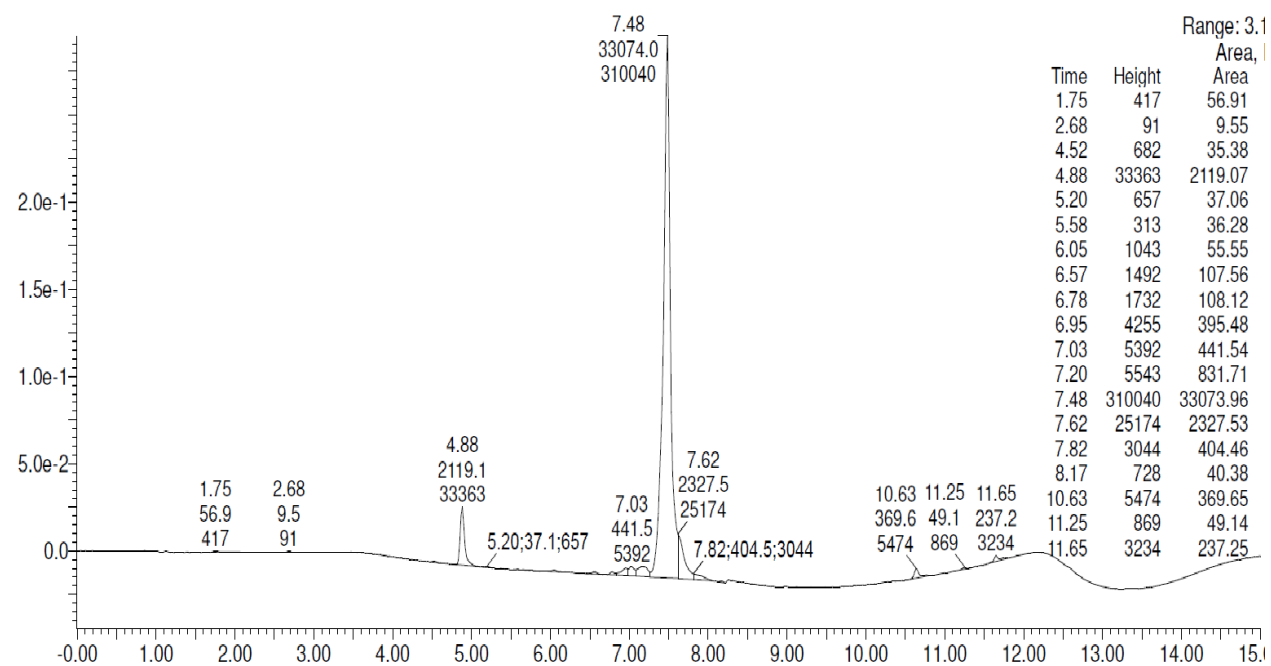

Figure 23. LC chromatogram of **VII-H** (after ammonolysis of **VII**)

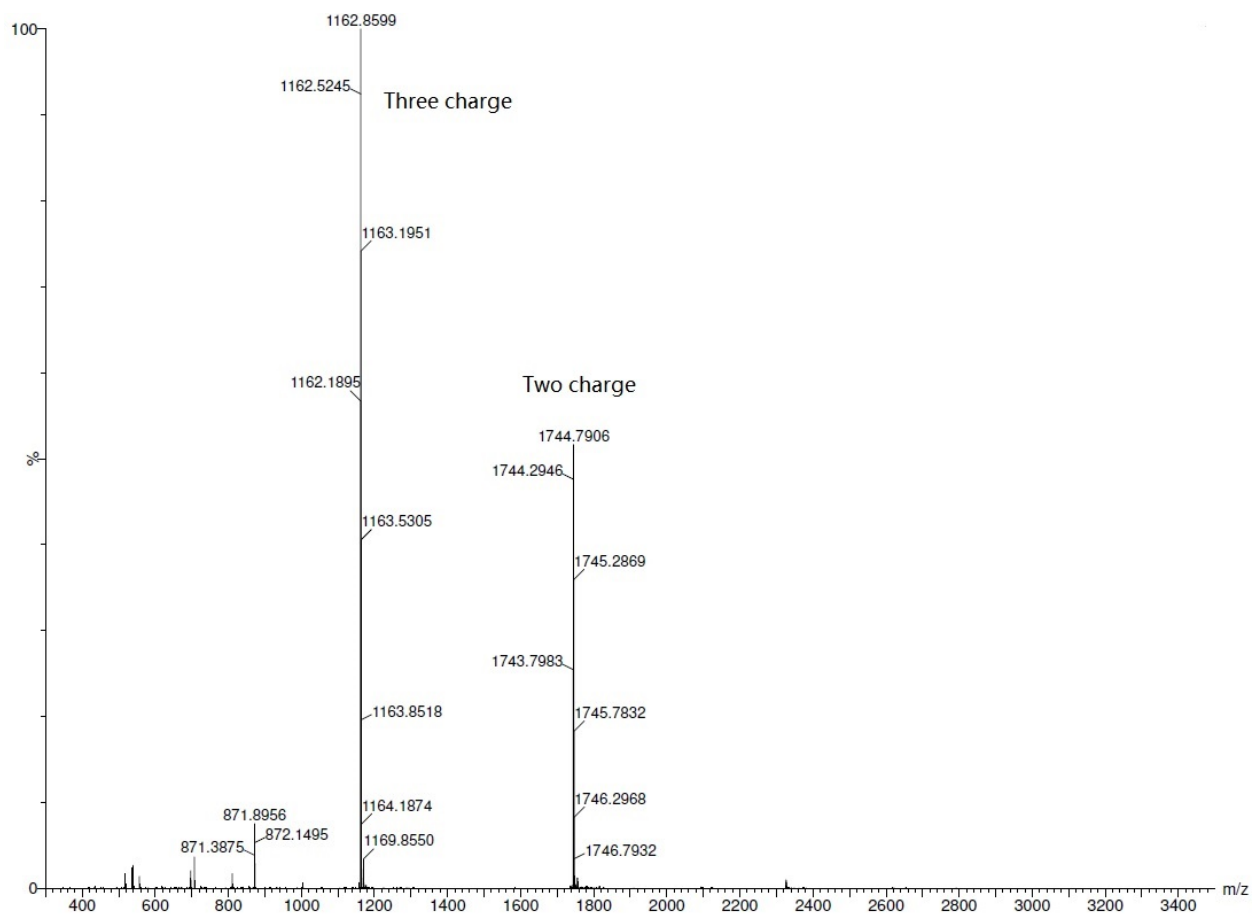

Figure 24. HRMS spectrum of **VII-H** (after ammonolysis of **VII**)

**Compound 5'-DMT-14-mer-H (DMT-on VIII-H) UPLC Condition, Chromatogram, and HRMS Spectrum:**

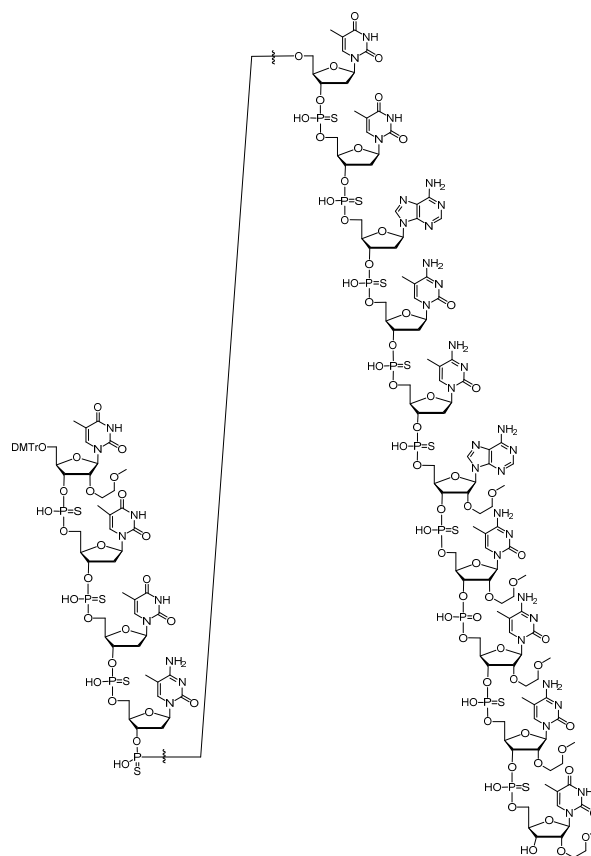

5'-DMTr-14-mer-H

| Column           | Acquity UPLC CSH Fluoro-Phenylcolumn (2.1mm*150mm, 1.7 $\mu$ m)                                                                                                                                                                                                   |            |    |     |    |     |    |    |    |    |    |    |    |    |    |
|------------------|-------------------------------------------------------------------------------------------------------------------------------------------------------------------------------------------------------------------------------------------------------------------|------------|----|-----|----|-----|----|----|----|----|----|----|----|----|----|
| Oven             | 55°C                                                                                                                                                                                                                                                              |            |    |     |    |     |    |    |    |    |    |    |    |    |    |
| Mobile phase     | A: 10 mM TEA + 100 mM HFIP in water<br>B: 10 mM TEA + 100 mM HFIP in MeOH                                                                                                                                                                                         |            |    |     |    |     |    |    |    |    |    |    |    |    |    |
| Gradient program | <table> <tr> <th>Time (min)</th><th>A%</th></tr> <tr> <td>0.0</td><td>90</td></tr> <tr> <td>1.0</td><td>90</td></tr> <tr> <td>10</td><td>50</td></tr> <tr> <td>11</td><td>15</td></tr> <tr> <td>12</td><td>90</td></tr> <tr> <td>16</td><td>90</td></tr> </table> | Time (min) | A% | 0.0 | 90 | 1.0 | 90 | 10 | 50 | 11 | 15 | 12 | 90 | 16 | 90 |
| Time (min)       | A%                                                                                                                                                                                                                                                                |            |    |     |    |     |    |    |    |    |    |    |    |    |    |
| 0.0              | 90                                                                                                                                                                                                                                                                |            |    |     |    |     |    |    |    |    |    |    |    |    |    |
| 1.0              | 90                                                                                                                                                                                                                                                                |            |    |     |    |     |    |    |    |    |    |    |    |    |    |
| 10               | 50                                                                                                                                                                                                                                                                |            |    |     |    |     |    |    |    |    |    |    |    |    |    |
| 11               | 15                                                                                                                                                                                                                                                                |            |    |     |    |     |    |    |    |    |    |    |    |    |    |
| 12               | 90                                                                                                                                                                                                                                                                |            |    |     |    |     |    |    |    |    |    |    |    |    |    |
| 16               | 90                                                                                                                                                                                                                                                                |            |    |     |    |     |    |    |    |    |    |    |    |    |    |
| Flow rate        | 0.2 mL/min                                                                                                                                                                                                                                                        |            |    |     |    |     |    |    |    |    |    |    |    |    |    |
| Detector         | UV 260 nm                                                                                                                                                                                                                                                         |            |    |     |    |     |    |    |    |    |    |    |    |    |    |
| Injection volume | 0.5 $\mu$ L                                                                                                                                                                                                                                                       |            |    |     |    |     |    |    |    |    |    |    |    |    |    |
| Diluent          | H <sub>2</sub> O                                                                                                                                                                                                                                                  |            |    |     |    |     |    |    |    |    |    |    |    |    |    |

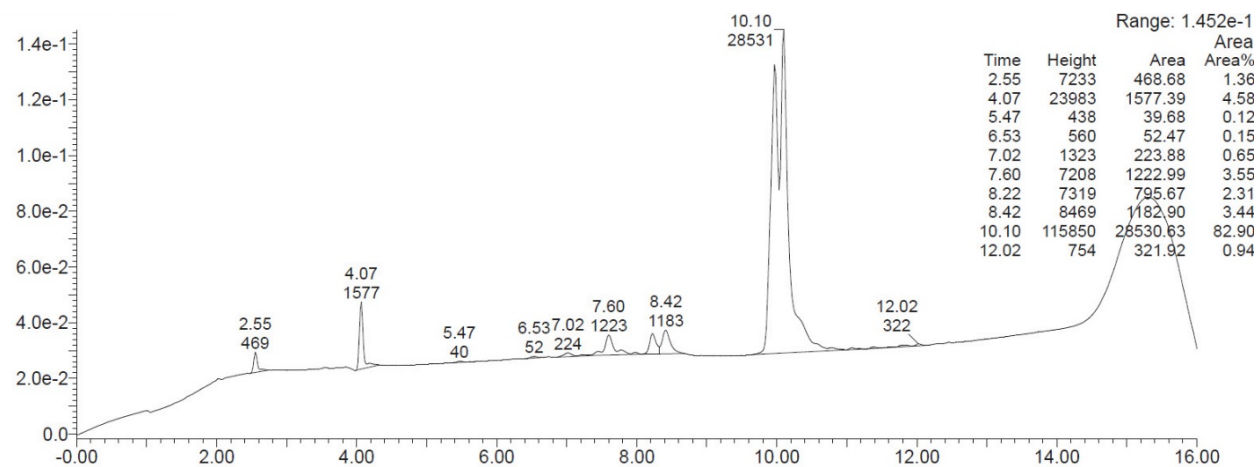

Figure 25. LC chromatogram of *DMT-on VIII-H*

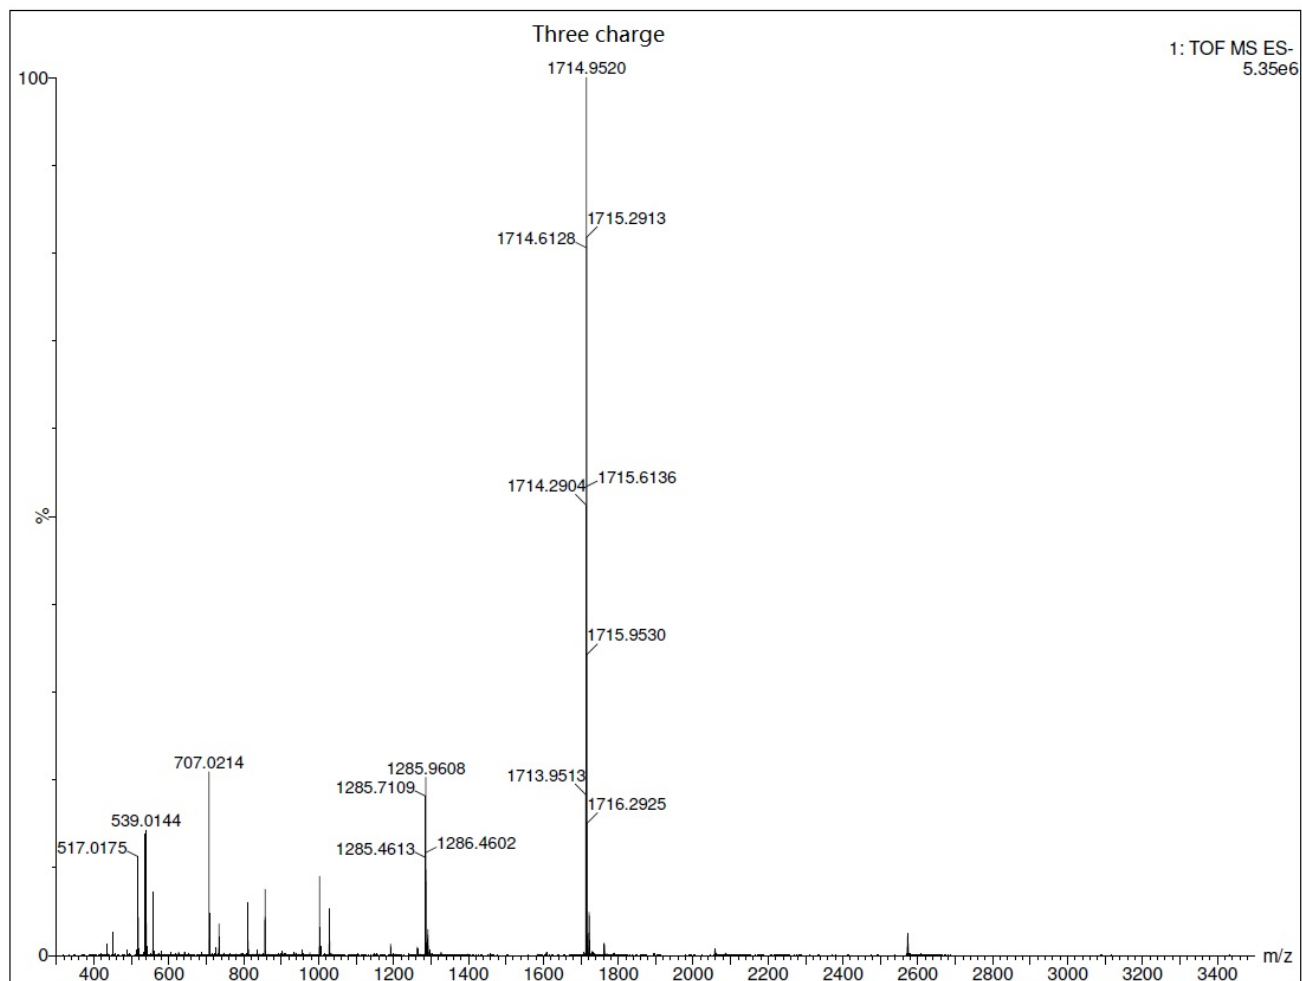

Figure 26. HRMS spectrum of *DMT-on VIII-H*

**Compound 5'-HO-14-mer-H (VIII-H) UPLC Condition, Chromatogram, and HRMS Spectrum:**

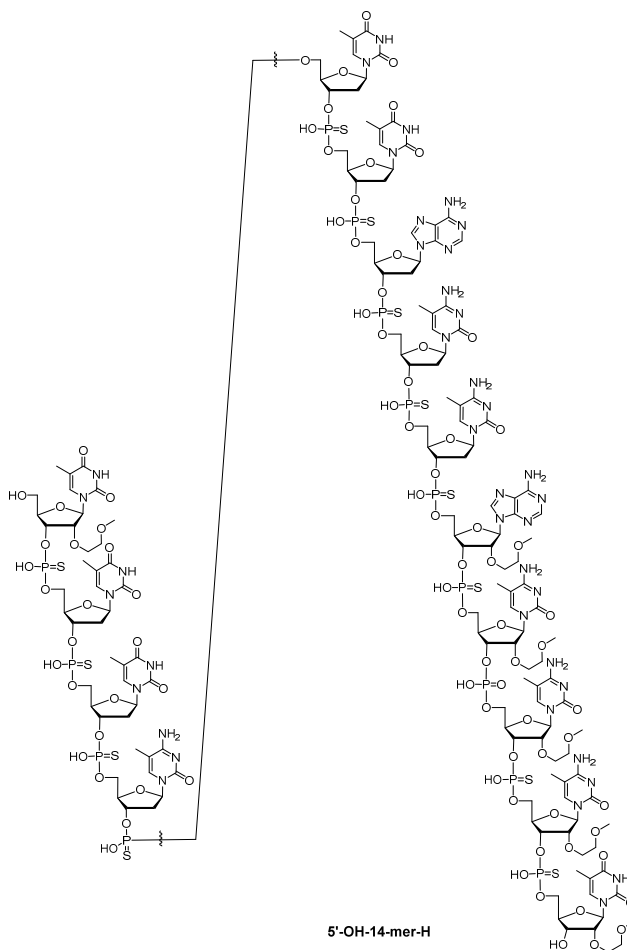

|                  |                                                                                                                                             |
|------------------|---------------------------------------------------------------------------------------------------------------------------------------------|
| Column           | Acquity UPLC CSH Fluoro-Phenylcolumn (2.1mm*150mm, 1.7 um)                                                                                  |
| Oven             | 55°C                                                                                                                                        |
| Mobile phase     | A: 10 mM TEA + 100 mM HFIP in water<br>B: 10 mM TEA + 100 mM HFIP in MeOH                                                                   |
| Gradient program | <div>Time (min)</div> <div>A%</div> <div>0.0 90</div> <div>1.0 90</div> <div>10 50</div> <div>11 15</div> <div>12 90</div> <div>16 90</div> |
| Flow rate        | 0.2 mL/min                                                                                                                                  |
| Detector         | UV 260 nm                                                                                                                                   |
| Injection volume | 0.5 µL                                                                                                                                      |
| Diluent          | H <sub>2</sub> O                                                                                                                            |

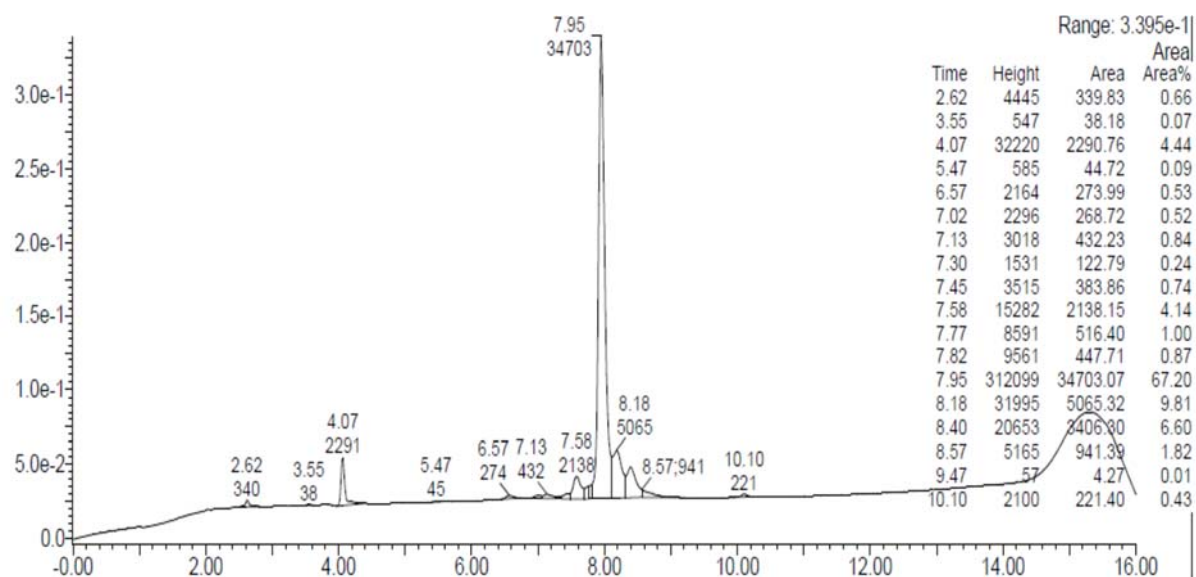

Figure 27. LC chromatogram of *VIII-H* (after ammonolysis of *VIII*)

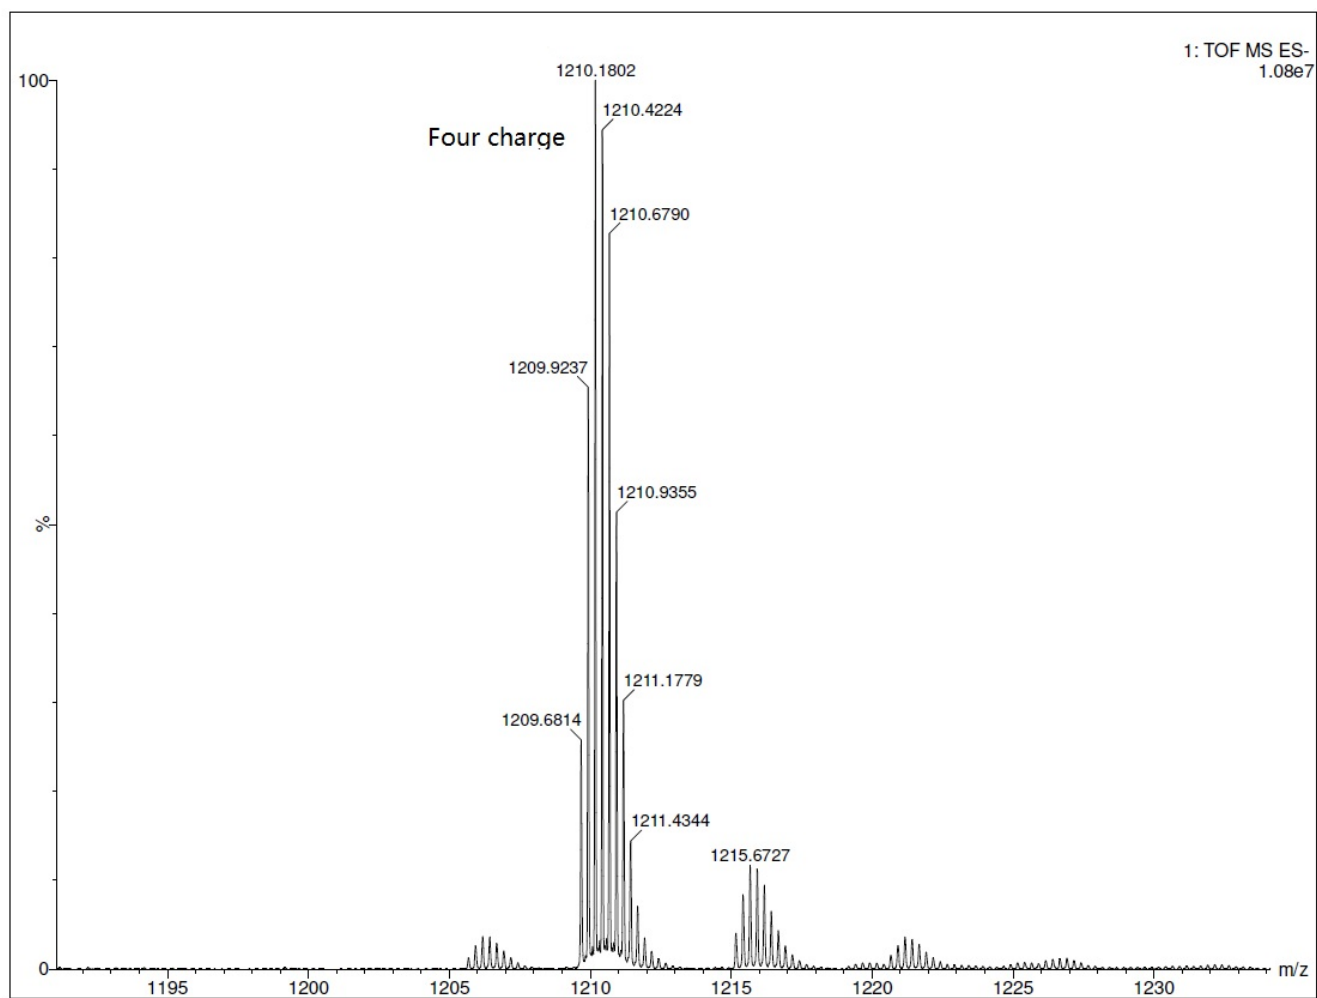

Figure 28. HRMS spectrum of *VIII-H* (after ammonolysis of *VIII*)



**HPLC condition of DMTr-on crude X and purified ON-A**

|                  |                                                                                                    |
|------------------|----------------------------------------------------------------------------------------------------|
| Column           | Waters Acquity BEH C18, 1.7 $\mu$ 2.1x100 mm                                                       |
| Oven             | 50°C                                                                                               |
| Mobile phase     | A: 10% ACN in water, 5 mM TBuAA, 1 $\mu$ M EDTA<br>B: 80% ACN in water, 5 mM TBuAA, 1 $\mu$ M EDTA |
| Gradient program | Time (min)<br>A%<br>0.0 55<br>14.67 55<br>16.67 20<br>17.33 55<br>20 55                            |
| Flow rate        | 0.25 mL/min                                                                                        |
| Detector         | UV 260 nm                                                                                          |
| Injection volume | 25 $\mu$ L                                                                                         |

**MS condition of DMTr-on crude X and purified ON-A**

|                                         |                              |       |
|-----------------------------------------|------------------------------|-------|
| Equipment                               | Agilent single quadrupole MS |       |
| Parameter                               | Standard                     | Harsh |
| Mass range (m/z)                        | 1500-2000                    |       |
| Ionization mode                         | API-ES                       |       |
| Scan mode                               | Negative polarity            |       |
| Needle voltage (V)                      | 4000                         |       |
| Nebulizer press (psig)                  | 30                           |       |
| Drying gas flow (L/min)                 | 12                           | 13    |
| Drying gas temperature (°C)             | 275                          | 350   |
| Fragmentor voltage (V)                  | 100                          |       |
| Gain                                    | 2                            |       |
| Threshold                               | 50                           |       |
| Step size [amu]                         | 0.1                          |       |
| Data acquisition time (min)             | 2-20                         |       |
| Data storage                            | Full                         |       |
| Peak width (min)                        | 0.05                         |       |
| MS extraction window for quantification | -0.3 - +0.7                  |       |

### The purity of the full-length DMTr-on crude X and Purified ON-A

The results of IP-RP-UHPLC-UV-MS analysis of crude and post purification ON-A are shown in the tables below. The upper table shows the UV response percentage of components in each sample based on their retention time range in the UHPLC analysis and the full-length product (FLP) purity determined by the combination of UV and MS response. The difference in FLP purity between crude X from SPOS and LPOS was mainly due to the different levels of early and late eluting impurities which were effectively removed by purification process. The lower table shows the MS response percentage of the components coeluting with FLP in the main peak. Purification process decreased the full-length (P=O) impurity level by 50%. The apparent post purification increase of the 2'-OEOE/dithioate/thioate impurity in the SPOS is likely due to interference by the sodium adduct of the FLP rather than a real increase in this impurity's abundance. A separate analysis in the QC lab with a slightly different method reported a lower 2'-OEOE/dithioate/thioate impurity level at 1.5%.

| Component (%)              | SPOS <sup>1</sup><br>Crude X | SPOS <sup>1</sup><br>ON-A | LPOS Crude X <sup>2</sup> | LPOS ON-A <sup>2</sup> |
|----------------------------|------------------------------|---------------------------|---------------------------|------------------------|
| Full-length product purity | 88.3                         | 92.4                      | 67.9                      | 91.4                   |
| UV purity                  | 93.7                         | 99.1                      | 76.8                      | 97.0                   |
| Early eluting impurities   | 5.3                          | 0.81                      | 17.6                      | 2.5                    |
| Late eluting impurities    | 1.0                          | 0.10                      | 5.6                       | 0.46                   |

For impurities coeluting with FLP under the main peak, MS% is reported as below.

|                                |      |                    |      |       |
|--------------------------------|------|--------------------|------|-------|
| MS purity                      | 94.3 | 93.2               | 88.4 | 94.2  |
| Full-length (P=O) <sup>1</sup> | 0.56 | 0.48               | 4.0  | 2.2   |
| Total n-1                      | 2.6  | 2.9                | 1.4  | 1.2   |
| Total abasic                   | 0.11 | <0.10 <sup>3</sup> | 0.19 | <0.10 |
| 2'-OEOE/dithioate/thioate      | 1.3  | 1.9                | 0.46 | 0.55  |
| Total n+1                      | 0.11 | 0.18               | 0.87 | 0.33  |

1, At 1.2 kg/batch scale. 2. At 180 g/batch scale using the fragments made at ~300 g scales. <sup>3</sup>Limit of detection is 0.10%

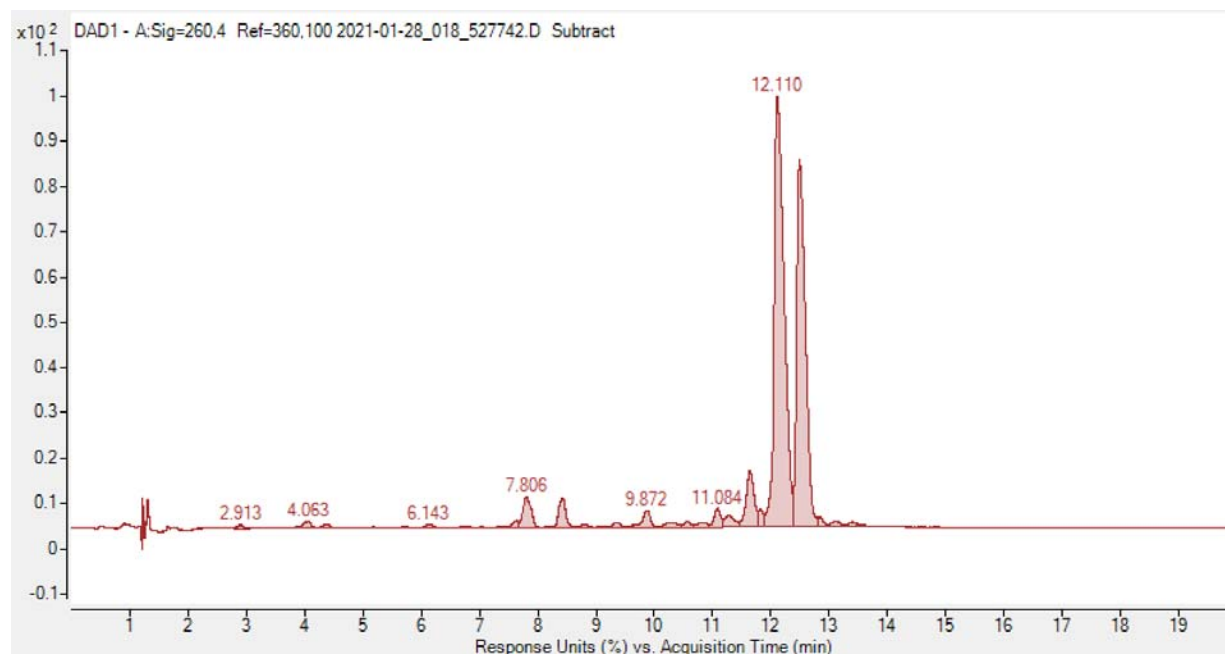

Figure 29. HPLC chromatogram of *crude X*

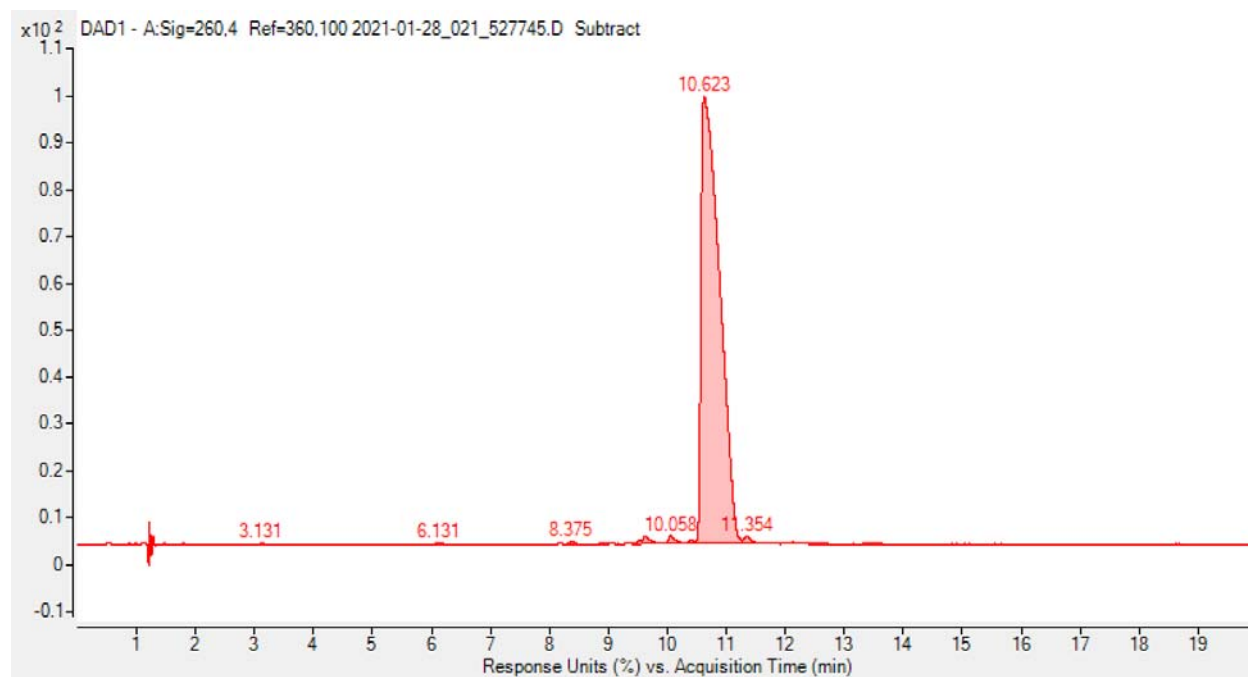

Figure 30. LC chromatogram of *X (after purification)*

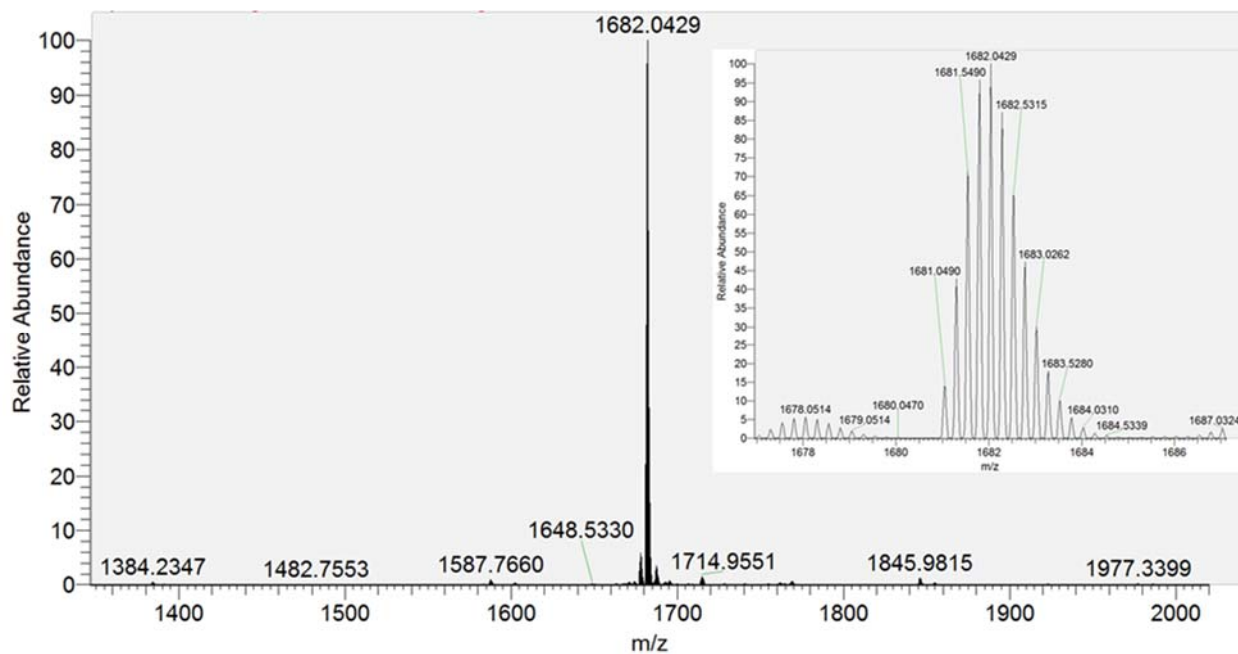

Figure 31.HRMS of Crude X

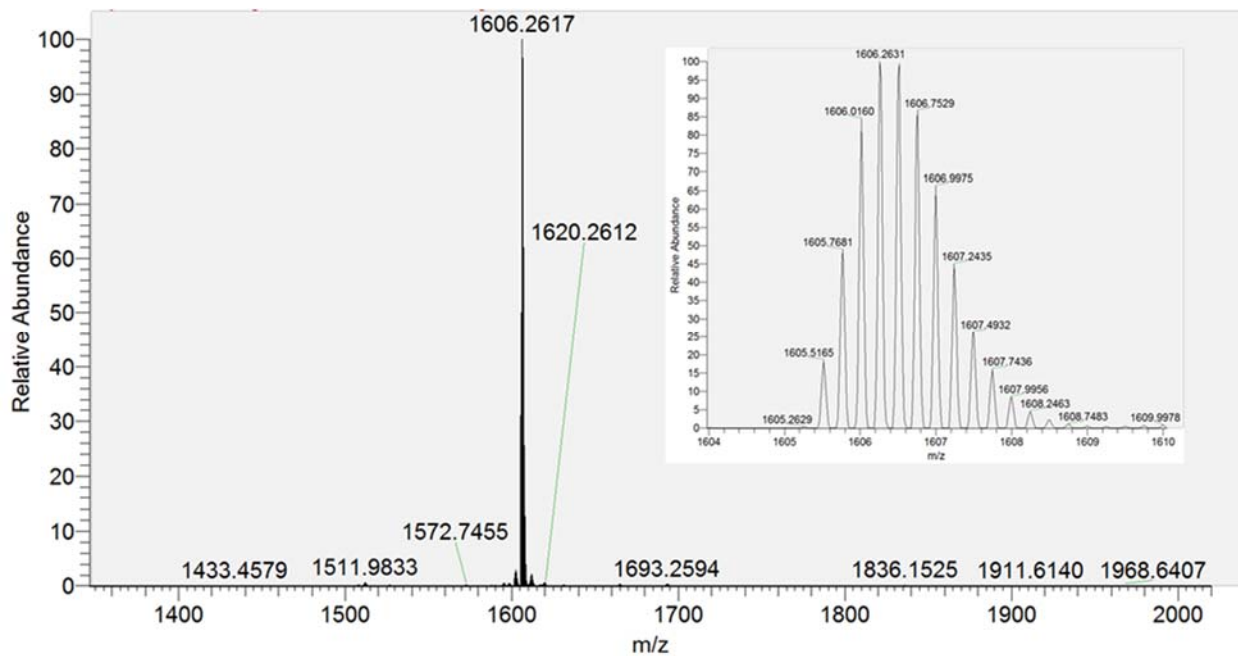

Figure 32.HRMS of ON-A
